# Supplementary material for: Bicyclic (alkyl)(amino)carbene (BICAAC)-supported phosphinidenes
Source: Royal Society of Chemistry journal article supplement (doi:10.1039/d3dt02765a), 2023-01-01
Supplement: d3dt02765a1.pdf [file d3dt02765a1.pdf]

SUPPORTING INFORMATION

**Bicyclic (Alkyl)(Amino)Carbene (BICAAC) Supported Phosphinidenes**

Ritu Yadav,<sup>a</sup> Bindusagar Das,<sup>a</sup> Ashi Singh,<sup>a</sup> Anmol,<sup>a</sup> Ankita Sharma,<sup>a</sup> Chinmoy Majumder,<sup>a</sup> Subrata Kundu\*<sup>a</sup>

Department of Chemistry, Indian Institute of Technology Delhi, Delhi, 110016, India

|                                                                                 |         |
|---------------------------------------------------------------------------------|---------|
| <b>Materials and Methods</b> .....                                              | S2      |
| <b>Experimental Details</b> .....                                               | S2      |
| Synthesis of <b>1</b> .....                                                     | S2      |
| Synthesis of <b>2</b> .....                                                     | S2      |
| Synthesis of <b>3</b> .....                                                     | S3      |
| Synthesis of <b>4</b> .....                                                     | S3      |
| <b>Crystallographic Data</b> .....                                              | S3      |
| General Information.....                                                        | S3-S4   |
| Structural Data.....                                                            | S4-S10  |
| <b>NMR Data</b> .....                                                           | S11-S17 |
| <b>HRMS</b> .....                                                               | S18-S19 |
| <b>Cyclic Voltammetry</b> .....                                                 | S20     |
| <b>Theoretical Studies</b> .....                                                | S20     |
| Roby-Gould Bond Indices (RGBI) analysis.....                                    | S20-S28 |
| Electron localization function (ELF) and Local orbital locator (LOL) plots..... | S28     |
| QTAIM analysis.....                                                             | S29-S38 |
| Second-order perturbation analysis.....                                         | S39     |
| <b>DFT Calculations</b> .....                                                   | S39-S70 |
| <b>References</b> .....                                                         | S70     |

## Materials and Methods:

All manipulations and storage of air-sensitive compounds were performed under an inert atmosphere either in dinitrogen filled Jacomex glove box or using dry dinitrogen standard Schenk line techniques. Dry oxygen and water free solvents were used. THF, Toluene and hexane were dried over sodium- potassium alloy and vacuum distilled over molecular sieves (4 Å) and stored overnight prior to use. BICAAC was prepared as reported in literature<sup>51</sup> for the synthesis of compound **1-3**. NMR Spectra were recorded on Bruker 500MHz and Jeol 400MHz spectrometers and tetramethylsilane (TMS) was used as an internal standard. Deuterated NMR solvent C<sub>6</sub>D<sub>6</sub> were dried over Na-K alloy and vacuum distilled. Melting points were recorded in sealed glass tube using Fischer-Scientific melting point apparatus. Bruker MicrO-TOF-QII model high-resolution mass spectrometer (HRMS) was used for characterization. Elemental analysis was performed using a UNICUBE Elementar GmbH analyser. Single crystal X-ray diffraction data for compounds **1-4** were collected using a Bruker SMART APEX diffractometer equipped with a 3-axis goniometer.<sup>52</sup> The crystals were covered with Paratone-N and mounted on a glass capillary. The data were collected at 302 K for compound **1-3** and at 100 K for compound **3** using Mo K $\alpha$  radiation ( $\lambda = 0.71073$  Å). The integration of data was performed using the SAINT. Empirical absorption correction was applied using SADABS.<sup>53</sup> Structural solutions were accomplished by direct methods and refined by fullmatrix least-squares on F2 using either ShelXT<sup>54</sup> or ShelXL<sup>55</sup> incorporated in Olex2<sup>56</sup>. All the non-hydrogen atoms were refined anisotropically. The positions of hydrogen atoms were fixed according to a riding model and were refined isotropically. Cyclic voltammograms were recorded at room temperature with a BioLogic SP-300 potentiostat. The working electrode was a glassy carbon disk (area = 0.02 cm<sup>2</sup>), the reference electrode was Ag/AgCl (saturated), and the counter electrode was a platinum wire. Important crystallographic data are given in Table S1-6.<sup>57</sup>

## Experimental Details:

1. Synthesis of (BICAAC)PCl (**1**): PCl<sub>3</sub> (220 mg, 1.6 mmol) was added dropwise to a solution of free BICAAC (1 g, 3.2 mmol) in THF at 0 °C to obtain a yellow solution with little precipitate. The solution was brought to room temperature slowly and stirred overnight to obtain a yellow suspension. The solvent was removed under vacuum and the remaining solid was extracted with n-hexane (2\* 40 ml). After filtration, the solvent was evaporated to obtain yellow crystalline solid in 25% yield. Crystals suitable for single crystal X-ray diffraction studies were obtained by keeping concentrated n-hexane solution at -20 °C. Melting point: 116°C. HRMS (FAB) m/z calculated for [C<sub>22</sub>H<sub>33</sub>CINP (M+H)<sup>+</sup> ] 378.2117, found 378.2119. <sup>1</sup>H NMR (500 MHz, C<sub>6</sub>D<sub>6</sub>)  $\delta$ (ppm): 7.20-7.16 (m, 1H), 7.02-7.00 (m, 2H), 3.33-3.27 (m, 1H), 3.15 – 3.07 (m, 1H), 1.87 – 1.78 (m, 1H), 1.76 – 1.68 (m, 1H), 1.56 – 1.48 (m, 8H), 1.26 – 1.15 (m, 12H), 1.05 (d, 3H), 0.57 (s, 3H). <sup>13</sup>C NMR (126 MHz, C<sub>6</sub>D<sub>6</sub>)  $\delta$ (ppm): 189.36 (d,  $J_{C-P} = 130.5$  Hz), 148.60, 148.25, 137.26, 123.96, 58.85, 44.30, 37.19, 36.51, 34.08, 29.28, 28.76, 25.13, 24.73, 23.80, 21.68, 18.26. <sup>31</sup>P NMR (203 MHz, C<sub>6</sub>D<sub>6</sub>)  $\delta$ (ppm): 115.34 (s). <sup>31</sup>P {<sup>1</sup>H} NMR (203 MHz, C<sub>6</sub>D<sub>6</sub>)  $\delta$ (ppm): 115.35 (s). Elemental analysis (%): calcd for C<sub>23</sub>H<sub>35</sub>CINP; C 70.48, H 9.00, N 3.57; found: C 69.12, H 9.376, N 3.14.
2. Synthesis of (BICAAC)PBr (**2**): PBr<sub>3</sub> (434 mg, 1.6 mmol) was added dropwise to a solution of free BICAAC (1g, 3.2mmol) in THF at 0 °C to obtain a yellow solution with little precipitate. The solution was brought to room temperature slowly and stirred overnight to obtain a yellow suspension. The solvent was removed under vacuum and the remaining solid was extracted with n-hexane (2\* 40

ml). After filtration, the solvent was evaporated to obtain yellow solid in 17% yield. Crystals suitable for single crystal X-ray diffraction studies were obtained by keeping concentrated toluene solution at -20 °C. Melting point: 142-145°C. HRMS (FAB) m/z calculated for [C<sub>22</sub>H<sub>33</sub>BrNP (M+H)<sup>+</sup>] 422.1612, found 422.1619. <sup>1</sup>H NMR (500 MHz, CDCl<sub>3</sub>) δ(ppm): 10.34 (s, 1H), 7.49-7.53 (m, 2H), 7.38 – 7.29 (m, 4H), 3.60-3.61 (m, 1H), 3.42-3.47 (m, 3H), 2.71 – 2.66 (m, 2H), 2.39-2.44 (m, 2H), 1.87 – 1.82 (m, 8H), 1.64-1.70(m, 8H)1.39 – 1.34 (m, 12H), 1.29-1.32 (dd, 12H), 0.85-0.88 (m, 3H), 0.81 (s, 3H), 0.11 (s, 3H), 0.07 (s, 3H). <sup>31</sup>P NMR (162 MHz) δ (ppm): 103.12. Elemental analysis (%): calcd for C<sub>23</sub>H<sub>35</sub>ClNP; C 63.30, H 8.08, N 3.21; found: C 64.03, H 8.438, N 3.40.

- Synthesis of (BICAAC)PI (**3**): PI<sub>3</sub> (660 mg, 1.6 mmol) was added dropwise to a solution of free BICAAC (1g, 3.2mmol) in THF at 0 °C to obtain a yellow solution with little precipitate. The solution was brought to room temperature slowly and stirred overnight to obtain a yellow suspension. The solvent was removed under vacuum and the remaining solid was extracted with n-hexane (2\* 40 ml). After filtration, the solvent was evaporated to obtain yellow crystalline solid in 15% yield. Crystals suitable for single crystal X-ray diffraction studies were obtained by keeping concentrated n-hexane solution at -20 °C. Melting point: 156-158 °C. HRMS (FAB) m/z calculated for [C<sub>22</sub>H<sub>33</sub>I<sub>2</sub>NP (M+H)<sup>+</sup>] 470.1474, found 470.1475. <sup>1</sup>H NMR (500 MHz, C<sub>6</sub>D<sub>6</sub>) δ(ppm): 7.25 – 7.22 (m, 1H), 7.06 – 7.03 (m, 1H), 3.22-3.17 (m, 1H), 3.01-2.96 (m, 1H), 1.84 – 1.79 (m, 1H), 1.73-1.69 (m, 1H), 1.62-1.59 (m, 6H), 1.48 (s, 2H), 1.32-1.28 (m, 6H), 1.20 – 1.14 (m, 6H), 1.05 (d, 3H), 0.58 (s, 3H). <sup>13</sup>C NMR (126 MHz, C<sub>6</sub>D<sub>6</sub>) δ(ppm): 149.12, 148.82, 136.27, 124.62, 58.94, 47.07, 44.15, 36.39, 33.94, 28.96, 25.64, 25.09, 24.81, 24.31, 23.78, 18.23. <sup>31</sup>P NMR (203 MHz, C<sub>6</sub>D<sub>6</sub>) δ(ppm): 56.13. <sup>31</sup>P {<sup>1</sup>H} NMR (203 MHz, C<sub>6</sub>D<sub>6</sub>) δ(ppm): 56.13. Elemental analysis (%): calcd for C<sub>23</sub>H<sub>35</sub>ClNP; C 57.15, H 7.30, N 2.90; found: C 54.14, H 7.45, N 2.80.
- Synthesis of (BICAAC)P-P(BICAAC) (**4**): KC<sub>8</sub> (144 mg, 1.065 mmol) was added to a solution of (BICAAC)PBr (450 mg, 1.065 mmol) in THF at rt to obtain a blue solution. Within 5 minutes, the colour of solution changed to yellow which was stirred for additional 3 hours. The solvent was removed under vacuum and the remaining solid was extracted with toluene (2\* 20 ml). After filtration, the solvent was removed to obtain a yellow solid in 66% yield. Crystals suitable for single crystal X-ray diffraction studies were obtained by keeping concentrated toluene solution at -20 °C. Melting point: 209-211 °C. HRMS (FAB) m/z calculated for [C<sub>44</sub>H<sub>66</sub>N<sub>2</sub>P<sub>2</sub> (M+H)<sup>+</sup>] 685.4779, found 685.4797. <sup>1</sup>H NMR (500 MHz, C<sub>6</sub>D<sub>6</sub>, ppm) δ: 7.27-7.24 (m, 2H), 7.15 – 7.12 (m, 4H), 3.31-3.27 (m, 2H), 3.10-3.05 (m, 2H), 1.91-1.85 (m, 2H), 1.70 – 1.53 (m, 18H), 1.37 – 1.18 (m, 18H), 1.08-1.03 (m, 12H), 0.63 (s, 6H). <sup>13</sup>C NMR (126 MHz, C<sub>6</sub>D<sub>6</sub>) δ (ppm): 186.39 (d, J<sub>C-P</sub> = 84.2 Hz), 149.37, 149.03, 140.90, 124.66, 58.19, 46.80, 45.23, 37.36, 34.68, 28.73, 28.32, 26.54, 25.91, 25.21, 24.54, 18.71. <sup>31</sup>P NMR (162 MHz) δ (ppm): 66.00. <sup>31</sup>P {<sup>1</sup>H} NMR (162 MHz) δ (ppm): 66.00.

### Crystallographic Data:

**Table S1: Crystallographic details and Refinement parameters for compound 1-4**

| Compound          | <b>1</b>                             | <b>2</b>                             | <b>3</b>                                          | <b>4</b>                                                      |
|-------------------|--------------------------------------|--------------------------------------|---------------------------------------------------|---------------------------------------------------------------|
| CCDC Number       | 2264850                              | 2264851                              | 2264852                                           | 22648533                                                      |
| Empirical Formula | C <sub>22</sub> H <sub>33</sub> ClNP | C <sub>22</sub> H <sub>33</sub> BrNP | C <sub>22</sub> H <sub>33</sub> I <sub>2</sub> NP | C <sub>44</sub> H <sub>66</sub> N <sub>2</sub> P <sub>2</sub> |

|                                              |                                                   |                                                   |                                                   |                                                   |
|----------------------------------------------|---------------------------------------------------|---------------------------------------------------|---------------------------------------------------|---------------------------------------------------|
| Formula weight                               | 377.91                                            | 422.37                                            | 469.36                                            | 684.92                                            |
| Temperature                                  | 273.15                                            | 302                                               | 298.00                                            | 109.00                                            |
| Wavelength                                   | 0.71073                                           | 0.71073                                           | 0.71073                                           | 0.71073                                           |
| Crystal system, Space group                  | Orthorhombic,<br>Pbca                             | Orthorhombic,<br>Pbca                             | Orthorhombic,<br>Pbca                             | Orthorhombic,<br>Pbca                             |
| Unit cell dimensions [Å]                     | a= 8.8488(4)<br>b= 16.8077(9)<br>c= 29.5760(16)   | a= 9.2049(8)<br>b=16.6408 (13)<br>c= 29.176(3)    | a= 15.5985(9)<br>b=19.4320(13)<br>c= 29.7451(16)  | a= 24.690(3)<br>b=35.674(4)<br>c= 18.131(2)       |
| $\alpha$ [°]                                 | 90                                                | 90                                                | 90                                                | 90                                                |
| $\beta$ [°]                                  | 90                                                | 90                                                | 90                                                | 90                                                |
| $\gamma$ [°]                                 | 90                                                | 90                                                | 90                                                | 90                                                |
| Volume [Å <sup>3</sup> ]                     | 4398.8(4)                                         | 4469.1(7)                                         | 9016.0(9)                                         | 15970(3)                                          |
| Z                                            | 8                                                 | 8                                                 | 16                                                | 16                                                |
| Absorption coefficient [mm <sup>-1</sup> ]   | 0.251                                             | 1.916                                             | 1.497                                             | 0.141                                             |
| F (000)                                      | 1632.0                                            | 1776.0                                            | 3840.0                                            | 5984.0                                            |
| Crystal size [mm]                            | 0.2 × 0.1 × 0.08                                  | 0.22 × 0.13 × 0.08                                | 0.23 × 0.15 × 0.1                                 | 0.2 × 0.08 × 0.08                                 |
| Theta range for data collection [°]          | 4.848 to 56.58                                    | 4.896 to 52.876                                   | 3.784 to 52.738                                   | 4.012 to 52.742                                   |
| Reflection collected/unique                  | 117468, 5461                                      | 120954, 4589                                      | 81806, 9211                                       | 39142, 7829                                       |
| Data completeness                            | 99.9                                              | 99.6                                              | 99.9                                              | 99.9                                              |
| Data/restraints/parameters                   | 5461/0/233                                        | 4589/1/243                                        | 9211/2/485                                        | 7829/3/498                                        |
| Goodness-of-fit on F <sup>2</sup>            | 1.053                                             | 1.063                                             | 1.009                                             | 1.032                                             |
| Final R indexes [ $I \geq 2\sigma(I)$ ]      | R <sub>1</sub> = 0.0625, wR <sub>2</sub> = 0.1566 | R <sub>1</sub> = 0.0393, wR <sub>2</sub> = 0.0962 | R <sub>1</sub> = 0.0456, wR <sub>2</sub> = 0.1029 | R <sub>1</sub> = 0.0703, wR <sub>2</sub> = 0.1684 |
| Final R indexes [all data]                   | R <sub>1</sub> = 0.0877, wR <sub>2</sub> = 0.1711 | R <sub>1</sub> = 0.0587, wR <sub>2</sub> = 0.1067 | R <sub>1</sub> = 0.0873, wR <sub>2</sub> = 0.1255 | R <sub>1</sub> = 0.1000, wR <sub>2</sub> = 0.1942 |
| Largest diff. peak/hole [e Å <sup>-3</sup> ] | 0.36/-0.49                                        | 0.38/-0.25                                        | 0.63/-0.54                                        | 0.87/-0.42                                        |

**Table S2: Bond length [Å] and Bond angle [°] for compound 1.**

|     |     |            |     |     |          |
|-----|-----|------------|-----|-----|----------|
| C1  | P1  | 2.0787(10) | C12 | C20 | 1.515(4) |
| P1  | C1  | 1.708(2)   | C5  | C6  | 1.524(3) |
| N1  | C11 | 1.444(2)   | C5  | C9  | 1.520(3) |
| N1  | C5  | 1.509(2)   | C5  | C4  | 1.528(3) |
| N1  | C1  | 1.361(2)   | C6  | C7  | 1.518(3) |
| C17 | C16 | 1.514(4)   | C7  | C2  | 1.543(3) |
| C17 | C19 | 1.519(5)   | C2  | C1  | 1.533(3) |

|     |     |          |     |     |          |
|-----|-----|----------|-----|-----|----------|
| C17 | C18 | 1.537(5) | C2  | C3  | 1.544(3) |
| C11 | C16 | 1.397(3) | C2  | C8  | 1.540(3) |
| C11 | C12 | 1.408(3) | C20 | C21 | 1.530(4) |
| C16 | C15 | 1.395(3) | C20 | C22 | 1.532(4) |
| C15 | C14 | 1.379(4) | C4  | C3  | 1.529(3) |
| C14 | C13 | 1.367(4) | C3  | C10 | 1.520(4) |
| C13 | C12 | 1.394(3) |     |     |          |

|     |     |     |            |     |     |     |            |
|-----|-----|-----|------------|-----|-----|-----|------------|
| C1  | P1  | C1  | 109.37(8)  | C6  | C5  | C4  | 107.55(19) |
| C11 | N1  | C5  | 120.91(15) | C9  | C5  | C6  | 111.54(19) |
| C1  | N1  | C11 | 123.13(17) | C9  | C5  | C4  | 111.4(2)   |
| C1  | N1  | C5  | 115.83(16) | C7  | C6  | C5  | 109.74(18) |
| C16 | C17 | C19 | 113.2(2)   | C6  | C7  | C2  | 110.87(19) |
| C16 | C17 | C18 | 111.0(3)   | C7  | C2  | C3  | 108.4(2)   |
| C19 | C17 | C18 | 110.1(3)   | C1  | C2  | C7  | 106.31(17) |
| C16 | C11 | N1  | 119.17(19) | C1  | C2  | C3  | 108.14(17) |
| C16 | C11 | C12 | 122.0(2)   | C1  | C2  | C8  | 115.1(2)   |
| C12 | C11 | N1  | 118.79(19) | C8  | C2  | C7  | 108.07(19) |
| C11 | C16 | C17 | 123.0(2)   | C8  | C2  | C3  | 110.52(19) |
| C15 | C16 | C17 | 119.2(2)   | N1  | C1  | P1  | 135.50(16) |
| C15 | C16 | C11 | 117.8(2)   | N1  | C1  | C2  | 111.58(17) |
| C14 | C15 | C16 | 120.7(3)   | C2  | C1  | P1  | 112.91(14) |
| C13 | C14 | C15 | 120.7(3)   | C12 | C20 | C21 | 111.7(2)   |
| C14 | C13 | C12 | 121.2(3)   | C12 | C20 | C22 | 112.1(3)   |
| C11 | C12 | C20 | 123.6(2)   | C21 | C20 | C22 | 109.0(2)   |
| C13 | C12 | C11 | 117.4(2)   | C5  | C4  | C3  | 111.36(19) |
| C13 | C12 | C20 | 118.9(2)   | C4  | C3  | C2  | 108.77(17) |
| N1  | C5  | C6  | 107.51(18) | C10 | C3  | C2  | 113.5(2)   |
| N1  | C5  | C9  | 111.51(18) | C10 | C3  | C4  | 112.0(2)   |
| N1  | C5  | C4  | 107.06(17) |     |     |     |            |

**Table S3: Bond length [Å] and Bond angle [°] for compound 2.**

|     |     |          |     |     |          |
|-----|-----|----------|-----|-----|----------|
| Br2 | P1  | 2.196(3) | C16 | C20 | 1.514(4) |
| P1  | C1  | 1.710(2) | C5  | C6  | 1.524(3) |
| P1  | Br1 | 2.322(6) | C5  | C4  | 1.525(3) |
| N1  | C11 | 1.446(3) | C6  | C7  | 1.512(3) |
| N1  | C5  | 1.507(3) | C7  | C2  | 1.534(4) |
| N1  | C1  | 1.357(3) | C2  | C3  | 1.543(4) |
| C10 | C5  | 1.515(3) | C2  | C1  | 1.540(3) |
| C11 | C12 | 1.407(3) | C2  | C8  | 1.540(3) |
| C11 | C16 | 1.395(3) | C3  | C4  | 1.527(4) |
| C12 | C13 | 1.389(4) | C3  | C9  | 1.515(4) |
| C12 | C17 | 1.515(4) | C17 | C18 | 1.525(4) |
| C13 | C14 | 1.362(5) | C17 | C19 | 1.534(4) |
| C14 | C15 | 1.373(5) | C20 | C21 | 1.519(5) |
| C15 | C16 | 1.394(4) | C20 | C22 | 1.533(5) |

|     |     |     |            |     |     |     |            |
|-----|-----|-----|------------|-----|-----|-----|------------|
| C1  | P1  | Br2 | 112.97(11) | C6  | C5  | C4  | 107.7(2)   |
| C1  | P1  | Br1 | 108.69(18) | C7  | C6  | C5  | 109.5(2)   |
| C11 | N1  | C5  | 121.21(16) | C6  | C7  | C2  | 111.0(2)   |
| C1  | N1  | C11 | 122.46(18) | C7  | C2  | C3  | 108.5(2)   |
| C1  | N1  | C5  | 116.14(17) | C7  | C2  | C1  | 106.92(19) |
| C12 | C11 | N1  | 118.9(2)   | C7  | C2  | C8  | 108.0(2)   |
| C16 | C11 | N1  | 118.9(2)   | C1  | C2  | C3  | 107.81(19) |
| C16 | C11 | C12 | 122.2(2)   | C8  | C2  | C3  | 110.8(2)   |
| C11 | C12 | C17 | 123.4(2)   | C8  | C2  | C1  | 114.7(2)   |
| C13 | C12 | C11 | 117.0(3)   | C4  | C3  | C2  | 108.89(19) |
| C13 | C12 | C17 | 119.5(2)   | C9  | C3  | C2  | 113.6(2)   |
| C14 | C13 | C12 | 121.7(3)   | C9  | C3  | C4  | 112.2(2)   |
| C13 | C14 | C15 | 120.7(3)   | C5  | C4  | C3  | 110.9(2)   |
| C14 | C15 | C16 | 120.8(3)   | C12 | C17 | C18 | 111.7(2)   |
| C11 | C16 | C20 | 123.3(2)   | C12 | C17 | C19 | 111.9(3)   |
| C15 | C16 | C11 | 117.7(3)   | C18 | C17 | C19 | 109.7(2)   |
| C15 | C16 | C20 | 119.1(3)   | C16 | C20 | C21 | 113.2(2)   |
| N1  | C5  | C10 | 111.61(19) | C16 | C20 | C22 | 111.0(3)   |
| N1  | C5  | C6  | 107.71(18) | C21 | C20 | C22 | 109.8(3)   |
| N1  | C5  | C4  | 107.14(18) | N1  | C1  | P1  | 136.34(17) |
| C10 | C5  | C6  | 111.2(2)   | N1  | C1  | C2  | 110.91(18) |
| C10 | C5  | C4  | 111.3(2)   | C2  | C1  | P1  | 112.74(15) |

**Table S4: Bond length [Å] and Bond angle [°] for compound 3.**

|     |     |           |     |     |          |
|-----|-----|-----------|-----|-----|----------|
| I2  | P2  | 2.510(7)  | C40 | C42 | 1.532(7) |
| I1  | P1  | 2.405(7)  | C14 | C15 | 1.371(7) |
| P2  | C23 | 1.720(4)  | C15 | C16 | 1.393(6) |
| P2  | I2A | 2.379(10) | C38 | C37 | 1.368(7) |
| P1  | C1  | 1.715(5)  | C5  | C6  | 1.526(7) |
| P1  | I1A | 2.505(6)  | C5  | C4  | 1.525(8) |
| N1  | C11 | 1.456(5)  | C5  | C8  | 1.520(7) |
| N1  | C1  | 1.362(5)  | C43 | C45 | 1.533(7) |
| N1  | C5  | 1.502(5)  | C43 | C44 | 1.545(7) |
| N2  | C34 | 1.452(5)  | C23 | C24 | 1.539(7) |
| N2  | C27 | 1.509(5)  | C37 | C36 | 1.369(7) |
| N2  | C23 | 1.363(5)  | C20 | C22 | 1.527(7) |
| C39 | C34 | 1.399(6)  | C20 | C21 | 1.502(7) |
| C39 | C40 | 1.510(6)  | C17 | C16 | 1.503(7) |
| C39 | C38 | 1.393(6)  | C17 | C18 | 1.526(7) |
| C11 | C12 | 1.392(6)  | C17 | C19 | 1.528(7) |
| C11 | C16 | 1.410(6)  | C2  | C7  | 1.509(7) |
| C34 | C35 | 1.396(6)  | C2  | C3  | 1.534(9) |
| C12 | C13 | 1.400(6)  | C2  | C9  | 1.543(9) |
| C12 | C20 | 1.523(6)  | C6  | C7  | 1.559(8) |
| C35 | C43 | 1.503(6)  | C33 | C25 | 1.539(8) |
| C35 | C36 | 1.393(6)  | C28 | C29 | 1.545(8) |

|     |     |          |            |     |     |           |          |
|-----|-----|----------|------------|-----|-----|-----------|----------|
| C1  | C2  | 1.547(6) |            | C24 | C25 | 1.529(9)  |          |
| C27 | C30 | 1.526(6) |            | C24 | C29 | 1.534(9)  |          |
| C27 | C33 | 1.522(6) |            | C24 | C32 | 1.563(7)  |          |
| C27 | C28 | 1.522(7) |            | C7  | C10 | 1.482(9)  |          |
| C13 | C14 | 1.362(7) |            | C4  | C3  | 1.524(10) |          |
| C40 | C41 | 1.531(7) |            | C25 | C31 | 1.473(10) |          |
| C23 | P2  | I2       | 113.52(18) | C4  | C5  | C6        | 107.0(4) |
| C23 | P2  | I2A      | 114.9(2)   | C8  | C5  | C6        | 112.7(5) |
| C1  | P1  | I1       | 114.5(2)   | C8  | C5  | C4        | 111.5(5) |
| C1  | P1  | I1A      | 114.57(18) | C35 | C43 | C45       | 112.5(4) |
| C11 | N1  | C5       | 121.2(3)   | C35 | C43 | C44       | 112.3(5) |
| C1  | N1  | C11      | 121.5(3)   | C45 | C43 | C44       | 108.8(5) |
| C1  | N1  | C5       | 117.3(3)   | N2  | C23 | P2        | 136.4(3) |
| C34 | N2  | C27      | 121.4(3)   | N2  | C23 | C24       | 110.7(4) |
| C23 | N2  | C34      | 122.4(3)   | C24 | C23 | P2        | 112.9(3) |
| C23 | N2  | C27      | 116.2(3)   | C38 | C37 | C36       | 119.5(4) |
| C34 | C39 | C40      | 123.8(4)   | C37 | C36 | C35       | 121.9(5) |
| C38 | C39 | C34      | 117.2(4)   | C12 | C20 | C22       | 111.1(4) |
| C38 | C39 | C40      | 119.0(4)   | C21 | C20 | C12       | 113.3(5) |
| C12 | C11 | N1       | 119.4(4)   | C21 | C20 | C22       | 110.5(5) |
| C12 | C11 | C16      | 122.3(4)   | C16 | C17 | C18       | 111.9(4) |
| C16 | C11 | N1       | 118.3(4)   | C16 | C17 | C19       | 112.6(5) |
| C39 | C34 | N2       | 118.8(4)   | C18 | C17 | C19       | 109.7(5) |
| C35 | C34 | N2       | 119.1(4)   | C7  | C2  | C1        | 107.9(4) |
| C35 | C34 | C39      | 122.1(4)   | C7  | C2  | C3        | 109.5(5) |
| C11 | C12 | C13      | 117.5(4)   | C7  | C2  | C9        | 109.8(5) |
| C11 | C12 | C20      | 124.1(4)   | C3  | C2  | C1        | 106.5(5) |
| C13 | C12 | C20      | 118.3(4)   | C3  | C2  | C9        | 108.7(6) |
| C34 | C35 | C43      | 123.9(4)   | C9  | C2  | C1        | 114.4(5) |
| C36 | C35 | C34      | 117.4(4)   | C5  | C6  | C7        | 109.2(4) |
| C36 | C35 | C43      | 118.8(4)   | C27 | C33 | C25       | 109.3(4) |
| N1  | C1  | P1       | 137.4(3)   | C27 | C28 | C29       | 110.7(5) |
| N1  | C1  | C2       | 110.3(4)   | C23 | C24 | C32       | 114.5(5) |
| C2  | C1  | P1       | 112.3(3)   | C25 | C24 | C23       | 107.9(5) |
| N2  | C27 | C30      | 111.1(3)   | C25 | C24 | C29       | 109.8(6) |
| N2  | C27 | C33      | 107.1(4)   | C25 | C24 | C32       | 110.6(5) |
| N2  | C27 | C28      | 108.2(4)   | C29 | C24 | C23       | 106.8(5) |
| C33 | C27 | C30      | 111.8(4)   | C29 | C24 | C32       | 107.1(6) |
| C33 | C27 | C28      | 107.4(4)   | C2  | C7  | C6        | 110.4(4) |
| C28 | C27 | C30      | 111.0(4)   | C10 | C7  | C2        | 115.0(6) |
| C14 | C13 | C12      | 121.1(5)   | C10 | C7  | C6        | 111.5(6) |
| C39 | C40 | C41      | 111.9(4)   | C3  | C4  | C5        | 111.2(5) |
| C39 | C40 | C42      | 112.3(4)   | C11 | C16 | C17       | 123.3(4) |
| C41 | C40 | C42      | 108.3(4)   | C15 | C16 | C11       | 117.0(4) |
| C13 | C14 | C15      | 120.8(4)   | C15 | C16 | C17       | 119.7(4) |
| C14 | C15 | C16      | 121.3(4)   | C4  | C3  | C2        | 109.2(5) |
| C37 | C38 | C39      | 122.0(5)   | C24 | C25 | C33       | 110.3(4) |

|    |    |    |          |     |     |     |          |
|----|----|----|----------|-----|-----|-----|----------|
| N1 | C5 | C6 | 106.1(4) | C31 | C25 | C33 | 113.7(7) |
| N1 | C5 | C4 | 107.9(4) | C31 | C25 | C24 | 112.9(6) |
| N1 | C5 | C8 | 111.3(4) | C24 | C29 | C28 | 108.4(5) |

**Table S5: Bond length [Å] and Bond angle [°] for compound 4.**

|       |       |           |           |       |           |       |          |
|-------|-------|-----------|-----------|-------|-----------|-------|----------|
| C1    | C7_2  | 1.516(7)  | C5_1      | C8_1  | 1.508(7)  |       |          |
| C2    | C5    | 1.514(16) | C5_1      | C4_1  | 1.532(9)  |       |          |
| C2    | C6    | 1.680(18) | C6_1      | C7_1  | 1.537(12) |       |          |
| C2    | C7_2  | 1.520(13) | C7_1      | C2_1  | 1.551(13) |       |          |
| C3    | C4    | 1.506(15) | C7_1      | C9_1  | 1.372(13) |       |          |
| C3    | C8    | 1.753(15) | C2_1      | C1_1  | 1.540(7)  |       |          |
| C3    | C7_2  | 1.546(12) | C2_1      | C3_1  | 1.546(13) |       |          |
| C7    | C10A  | 1.546(16) | C2_1      | C10_1 | 1.576(11) |       |          |
| C7A   | C10_2 | 1.521(19) | C20_1     | C22_1 | 1.523(9)  |       |          |
| C4    | C10_2 | 1.55(3)   | C20_1     | C21_1 | 1.538(9)  |       |          |
| C5    | C10A  | 1.50(2)   | C17_1     | C19_1 | 1.536(9)  |       |          |
| C8    | C9    | 1.517(19) | C17_1     | C18_1 | 1.548(8)  |       |          |
| C8    | C10A  | 1.57(2)   | C4_1      | C3_1  | 1.517(11) |       |          |
| C6    | C10   | 1.53(2)   | P1_2      | P1_21 | 2.182(3)  |       |          |
| C6    | C10_2 | 1.50(3)   | P1_2      | C11_2 | 1.735(6)  |       |          |
| C10A  | C11_2 | 1.579(13) | N1_2      | C1_2  | 1.441(7)  |       |          |
| C20A  | C2_1  | 1.574(16) | N1_2      | C7_2  | 1.498(7)  |       |          |
| P1_1  | P1_11 | 2.193(3)  | N1_2      | C11_2 | 1.378(7)  |       |          |
| P1_1  | C1_1  | 1.721(5)  | C1_2      | C2_2  | 1.401(9)  |       |          |
| N1_1  | C11_1 | 1.433(6)  | C1_2      | C6_2  | 1.413(10) |       |          |
| N1_1  | C5_1  | 1.508(6)  | C2_2      | C3_2  | 1.376(9)  |       |          |
| N1_1  | C1_1  | 1.376(6)  | C2_2      | C12_2 | 1.527(11) |       |          |
| C11_1 | C12_1 | 1.396(9)  | C3_2      | C4_2  | 1.380(11) |       |          |
| C11_1 | C16_1 | 1.414(8)  | C4_2      | C5_2  | 1.378(10) |       |          |
| C12_1 | C13_1 | 1.397(8)  | C5_2      | C6_2  | 1.396(9)  |       |          |
| C12_1 | C20_1 | 1.519(9)  | C6_2      | C14_2 | 1.487(10) |       |          |
| C13_1 | C14_1 | 1.370(10) | C10_2     | C11_2 | 1.590(15) |       |          |
| C14_1 | C15_1 | 1.385(10) | C12_2     | C13_2 | 1.539(12) |       |          |
| C15_1 | C16_1 | 1.378(8)  | C12_2     | C20_2 | 1.523(11) |       |          |
| C16_1 | C17_1 | 1.515(9)  | C14_2     | C15_2 | 1.542(12) |       |          |
| C5_1  | C6_1  | 1.518(9)  | C14_2     | C21_2 | 1.533(10) |       |          |
| C5    | C2    | C7_2      | 119.6(8)  | C3_1  | C2_1      | C10_1 | 199.2(8) |
| C7_2  | C2    | C6        | 97.6(8)   | N1_1  | C1_1      | P1_1  | 134.6(4) |
| C4    | C3    | C7_2      | 119.6(8)  | N1_1  | C1_1      | C2_1  | 109.9(4) |
| C7_2  | C3    | C8        | 96.9(8)   | C2_1  | C1_1      | P1_1  | 115.5(4) |
| C3    | C4    | C10_2     | 100.8(12) | C12_1 | C20_1     | C22_1 | 112.3(6) |
| C10A  | C5    | C2        | 102.8(12) | C12_1 | C20_1     | C21_1 | 111.2(5) |
| C9    | C8    | C3        | 101.5(11) | C22_1 | C20_1     | C21_1 | 108.9(6) |



|       |       |                   |            |       |       |                   |           |
|-------|-------|-------------------|------------|-------|-------|-------------------|-----------|
| C9    | C8    | C10A              | 116.2(12)  | C16_1 | C17_1 | C19_1             | 111.9(5)  |
| C10A  | C8    | C3                | 115.1(9)   | C16_1 | C17_1 | C18_1             | 111.0(5)  |
| C10   | C6    | C2                | 100.5(14)  | C19_1 | C17_1 | C18_1             | 108.8(5)  |
| C10_2 | C6    | C2                | 117.2(10)  | C3_1  | C4_1  | C5_1              | 111.8(6)  |
| C10_2 | C6    | C10               | 113.0(15)  | C4_1  | C3_1  | C2_1              | 109.0(7)  |
| C7    | C10A  | C8                | 107.3(12)  | C11_2 | P1_2  | P1_2 <sup>1</sup> | 107.6(2)  |
| C7    | C10A  | C11_2             | 115.8(10)  | C1_2  | N1_2  | C7_2              | 121.0(4)  |
| C5    | C10A  | C7                | 110.3(12)  | C11_2 | N1_2  | C1_2              | 122.4(4)  |
| C5    | C10A  | C8                | 107.7(12)  | C11_2 | N1_2  | C7_2              | 116.6(5)  |
| C5    | C10A  | C11_2             | 114.8(11)  | C2_2  | C1_2  | N1_2              | 120.6(6)  |
| C8    | C10A  | C11_2             | 99.8(10)   | C2_2  | C1_2  | C6_2              | 121.3(5)  |
| C1_1  | P1_1  | P1_1 <sup>1</sup> | 107.55(18) | C6_2  | C1_2  | N1_2              | 118.1(6)  |
| C11_1 | N1_1  | C5_1              | 119.1(4)   | C1_2  | C2_2  | C12_2             | 123.3(6)  |
| C1_1  | N1_1  | C11_1             | 123.8(4)   | C3_2  | C2_2  | C1_2              | 118.6(7)  |
| C1_1  | N1_1  | C5_1              | 117.1(4)   | C3_2  | C2_2  | C12_2             | 118.1(6)  |
| C12_1 | C11_1 | N1_1              | 119.5(5)   | C2_2  | C3_2  | C4_2              | 121.6(7)  |
| C12_1 | C11_1 | C16_1             | 121.5(4)   | C5_2  | C4_2  | C3_2              | 119.4(6)  |
| C16_1 | C11_1 | N1_1              | 119.0(5)   | C4_2  | C5_2  | C6_2              | 121.9(7)  |
| C11_1 | C12_1 | C13_1             | 117.9(6)   | C1_2  | C6_2  | C14_2             | 124.6(6)  |
| C11_1 | C12_1 | C20_1             | 123.5(5)   | C5_2  | C6_2  | C1_2              | 117.1(6)  |
| C13_1 | C12_1 | C20_1             | 118.6(5)   | C5_2  | C6_2  | C14_2             | 118.2(7)  |
| C14_1 | C13_1 | C12_1             | 121.2(6)   | C1    | C7_2  | C2                | 111.2(7)  |
| C13_1 | C14_1 | C15_1             | 120.0(5)   | C1    | C7_2  | C3                | 109.6(7)  |
| C16_1 | C15_1 | C14_1             | 121.4(6)   | C2    | C7_2  | C3                | 108.8(6)  |
| C11_1 | C16_1 | C17_1             | 122.6(5)   | N1_2  | C7_2  | C1                | 111.9(5)  |
| C15_1 | C16_1 | C11_1             | 117.8(5)   | N1_2  | C7_2  | C2                | 108.4(6)  |
| C15_1 | C16_1 | C17_1             | 119.6(5)   | N1_2  | C7_2  | C3                | 106.8(6)  |
| N1_1  | C5_1  | C6_1              | 106.8(5)   | C7A   | C10_2 | C4                | 105.7(14) |
| N1_1  | C5_1  | C4_1              | 106.5(5)   | C7A   | C10_2 | C11_2             | 114.7(12) |
| C6_1  | C5_1  | C4_1              | 108.4(5)   | C4    | C10_2 | C11_2             | 113.4(13) |
| C8_1  | C5_1  | N1_1              | 112.3(4)   | C6    | C10_2 | C7A               | 112.8(14) |
| C8_1  | C5_1  | C6_1              | 111.4(6)   | C6    | C10_2 | C4                | 108.1(13) |
| C8_1  | C5_1  | C4_1              | 111.2(5)   | C6    | C10_2 | C11_2             | 102.2(14) |
| C5_1  | C6_1  | C7_1              | 109.7(6)   | C10A  | C11_2 | P1_2              | 112.8(6)  |
| C6_1  | C7_1  | C2_1              | 110.3(6)   | N1_2  | C11_2 | C10A              | 110.3(7)  |
| C9_1  | C7_1  | C6_1              | 121.6(11)  | N1_2  | C11_2 | P1_2              | 135.2(5)  |
| C9_1  | C7_1  | C2_1              | 112.2(7)   | N1_2  | C11_2 | C10_2             | 108.7(7)  |
| C7_1  | C2_1  | C20A              | 92.2(12)   | C10_2 | C11_2 | P1_2              | 114.5(7)  |
| C7_1  | C2_1  | C10_1             | 118.5(7)   | C2_2  | C12_2 | C13_2             | 111.1(6)  |
| C1_1  | C2_1  | C20A              | 111.9(8)   | C20_2 | C12_2 | C2_2              | 111.7(7)  |
| C1_1  | C2_1  | C7_1              | 108.3(7)   | C20_2 | C12_2 | C13_2             | 110.7(7)  |
| C1_1  | C2_1  | C3_1              | 108.0(6)   | C6_2  | C14_2 | C15_2             | 111.6(6)  |
| C1_1  | C2_1  | C10_1             | 114.6(6)   | C6_2  | C14_2 | C21_2             | 112.0(6)  |

C3\_1 C2\_1 C20A 126.8(10) C21\_2 C14\_2 C15\_2 108.3(7)  
C3\_1 C2\_1 C7\_1 107.3(6)

### Solid State structure of compound 3

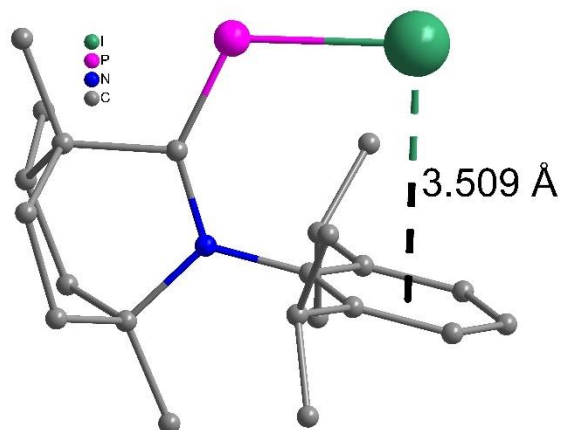

Fig S1: Representation of  $\pi$  interaction of X (X= I) with  $\pi$  electron cloud of Dipp group.

## NMR Data:

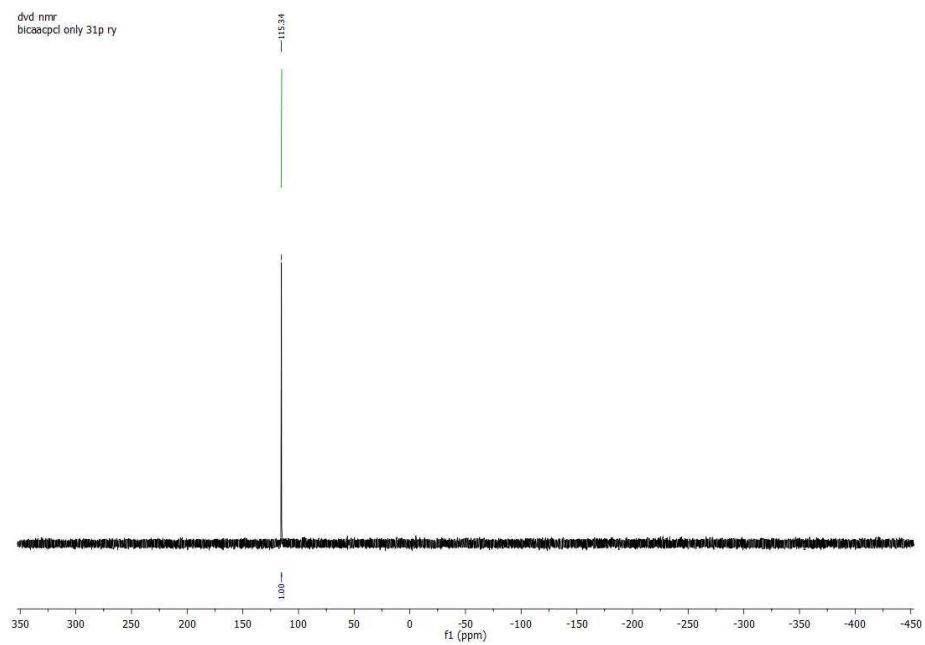

Fig S2:  $^{31}\text{P}$  NMR of compound **1**

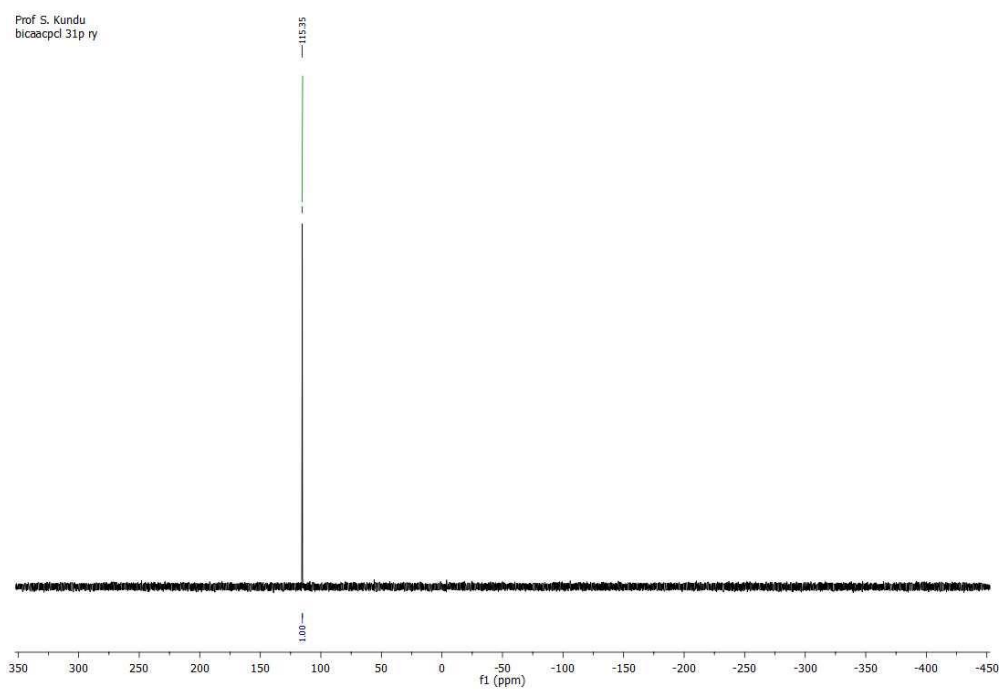

Fig S3:  $^{31}\text{P}\{^1\text{H}\}$  NMR of compound **1**

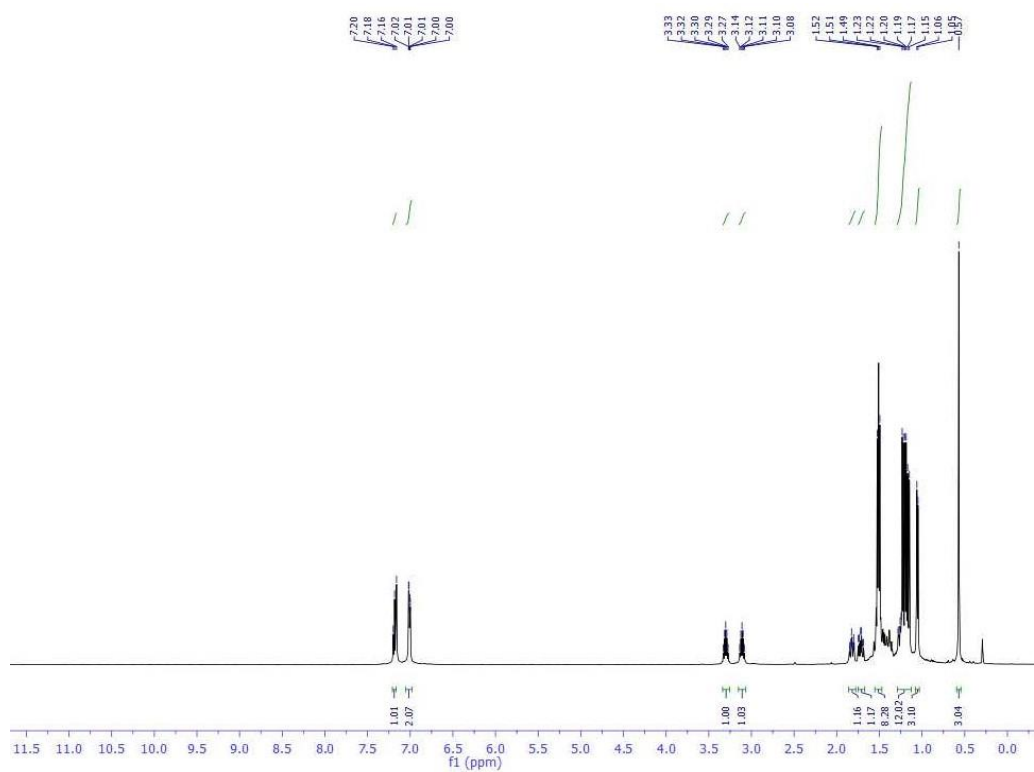

Fig S4:  $^1\text{H}$  NMR of compound **1**

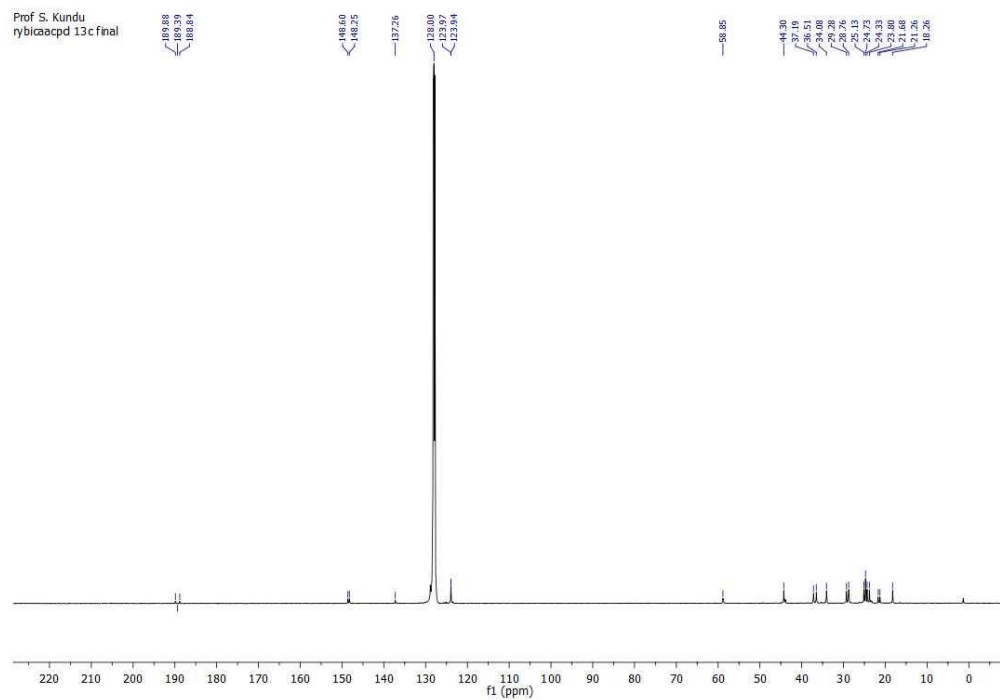

Fig S5:  $^{13}\text{C}$  NMR of compound **1**

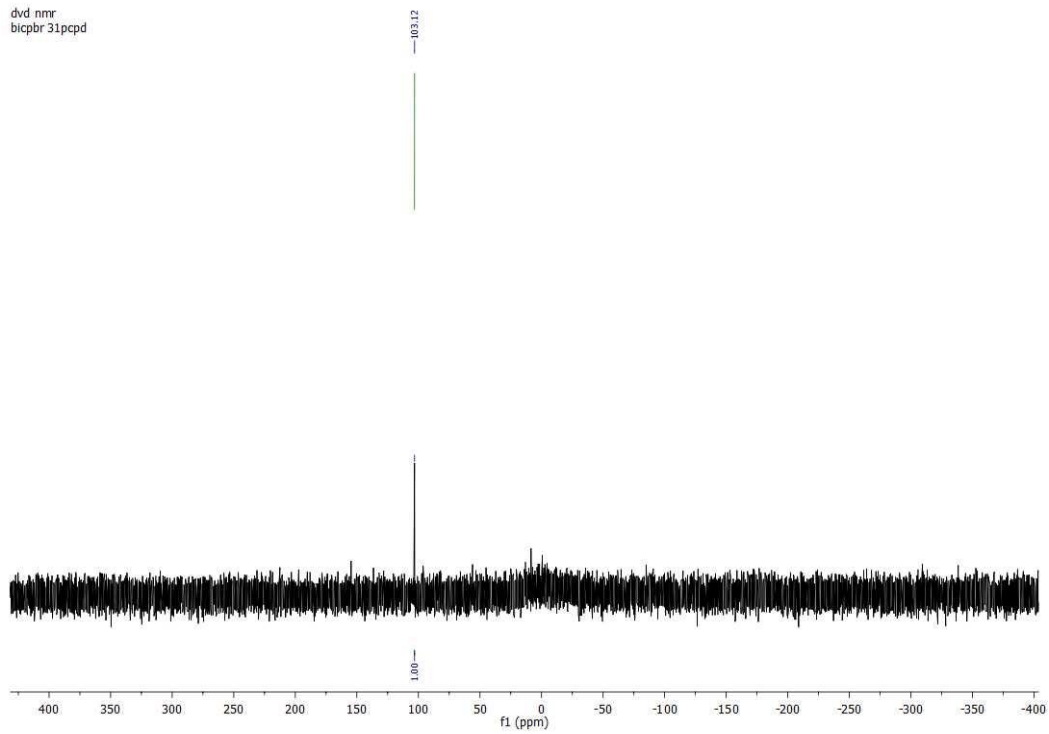

Fig S6:  $^{31}\text{P}\{^1\text{H}\}$  NMR of compound **2**

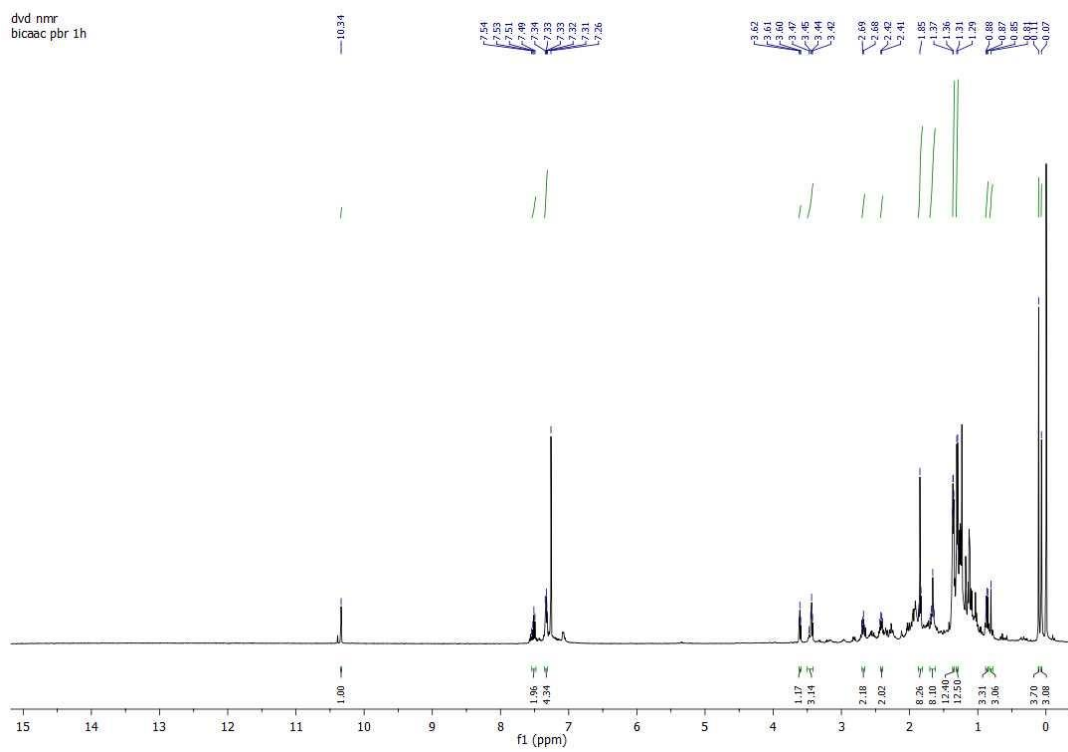

Fig S7:  $^1\text{H}$  NMR of compound **2**

dvd nmr  
ry bicpl p31

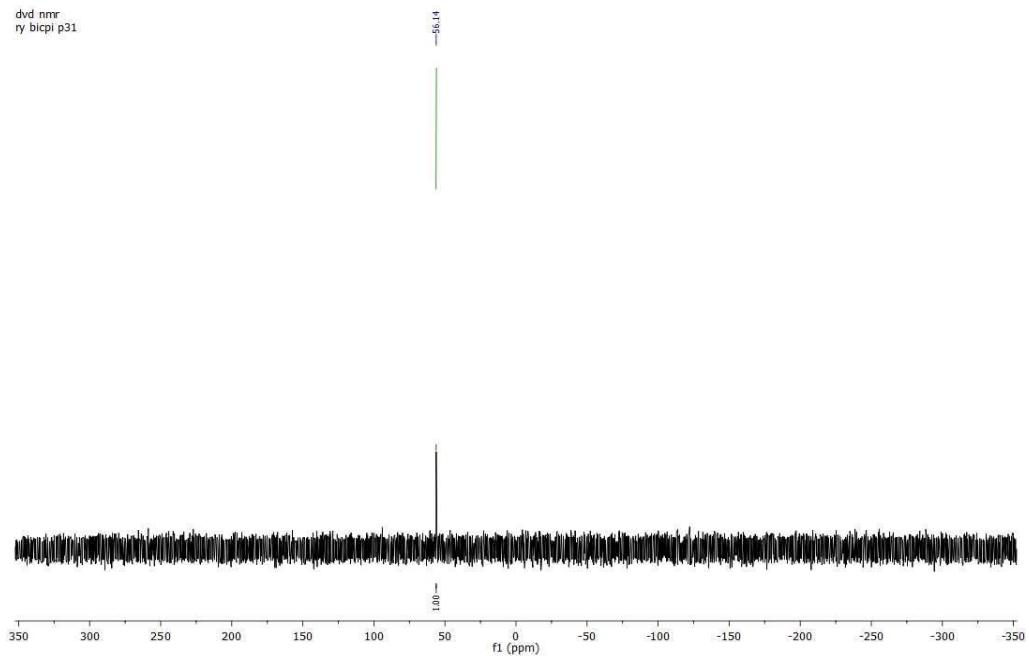

Fig S8:  $^{31}\text{P}$  NMR of compound **3**

dvd nmr  
ry bicpl p31cpd again

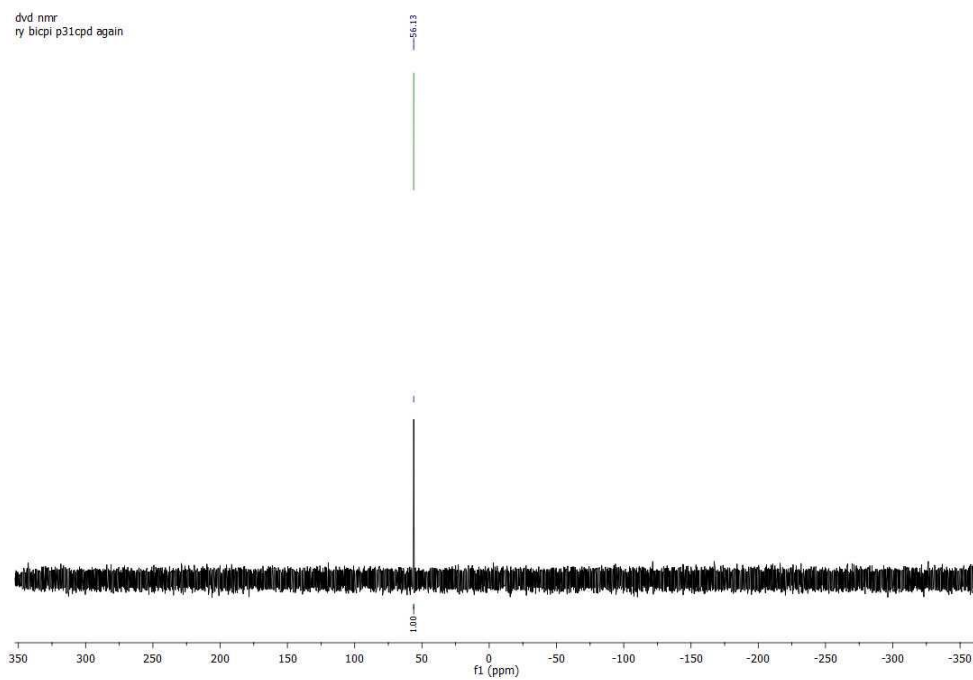

Fig S9:  $^{31}\text{P}\{^1\text{H}\}$  NMR of compound **3**

New folder  
ry bicpi 1h

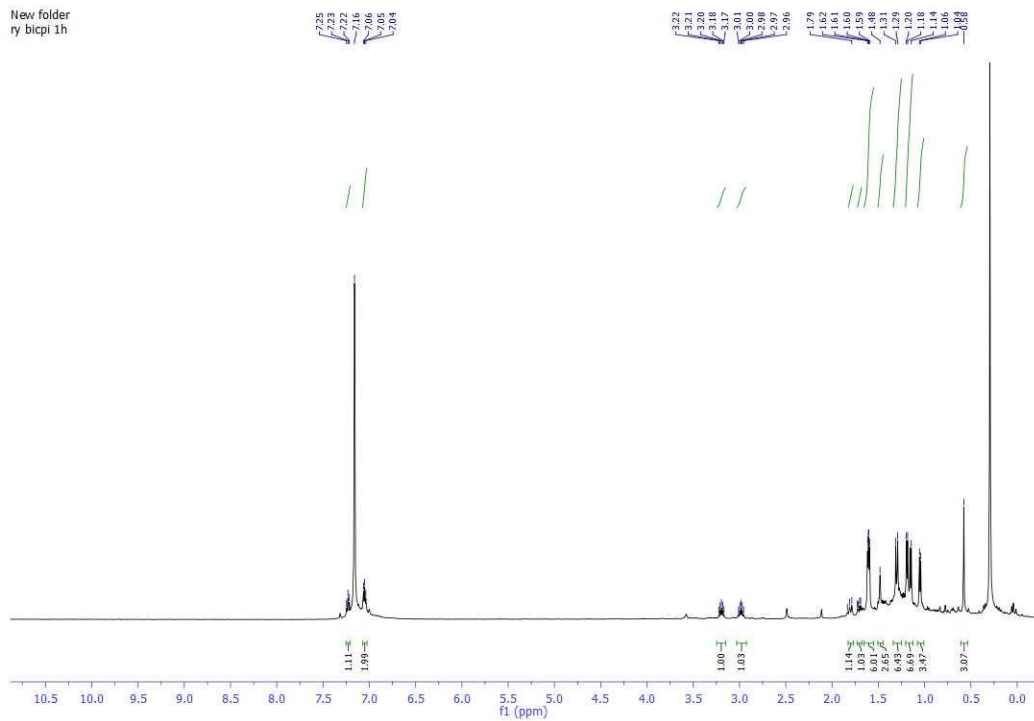

Fig S10: <sup>1</sup>H NMR of compound 3

Prof. S. Kundu  
ry bicpi 13c

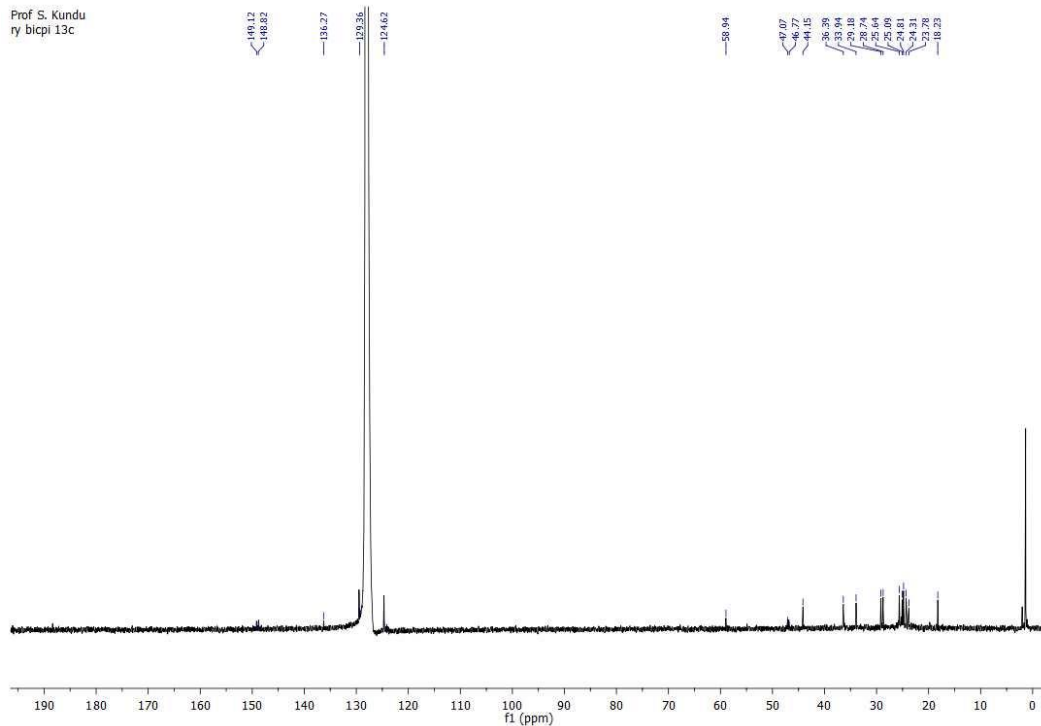

Fig S11: <sup>13</sup>C NMR of compound 3

RY PP 2  
31P

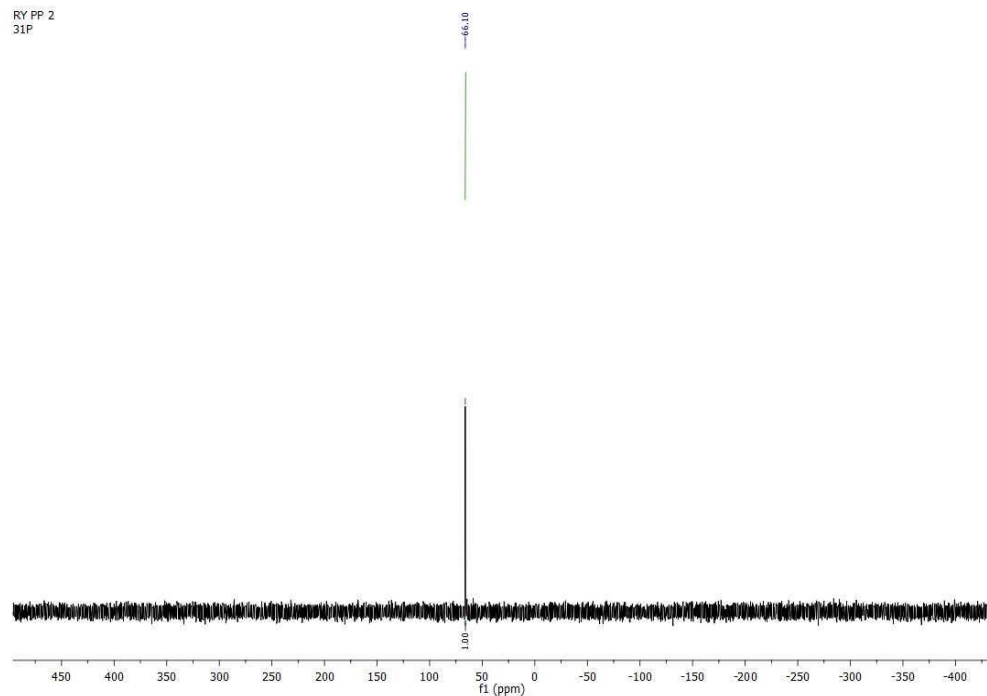

Fig S12:  $^{31}\text{P}$  NMR of compound 4

RY PP  
31P{1H}

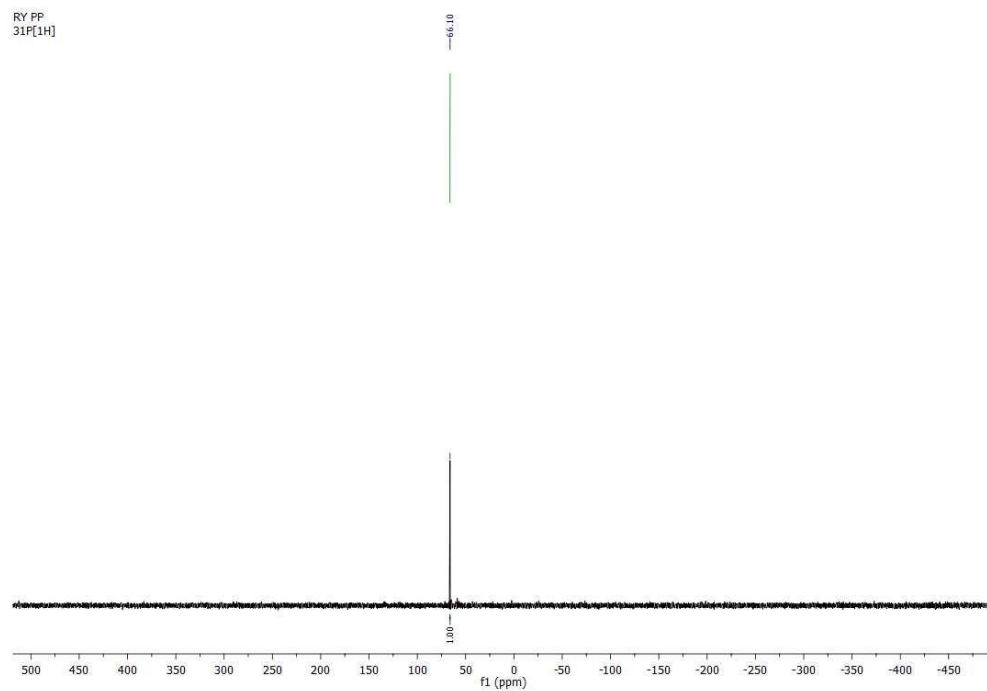

Fig S13:  $^{31}\text{P}\{^1\text{H}\}$  NMR of compound 4



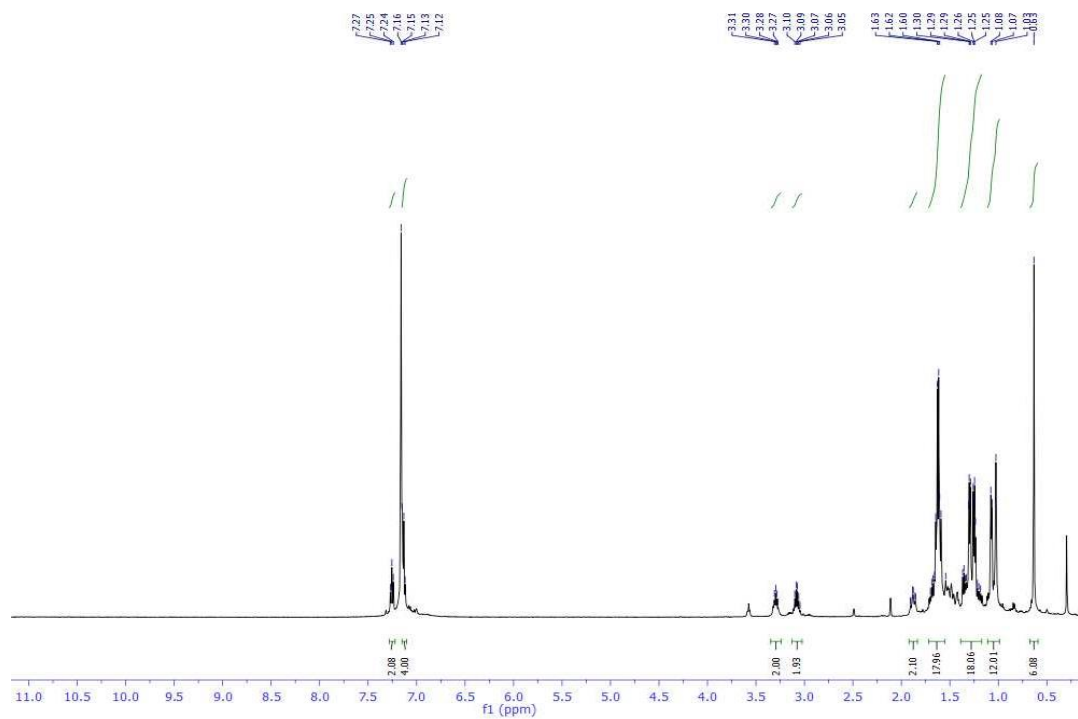

Fig S14: <sup>1</sup>H NMR of compound 4

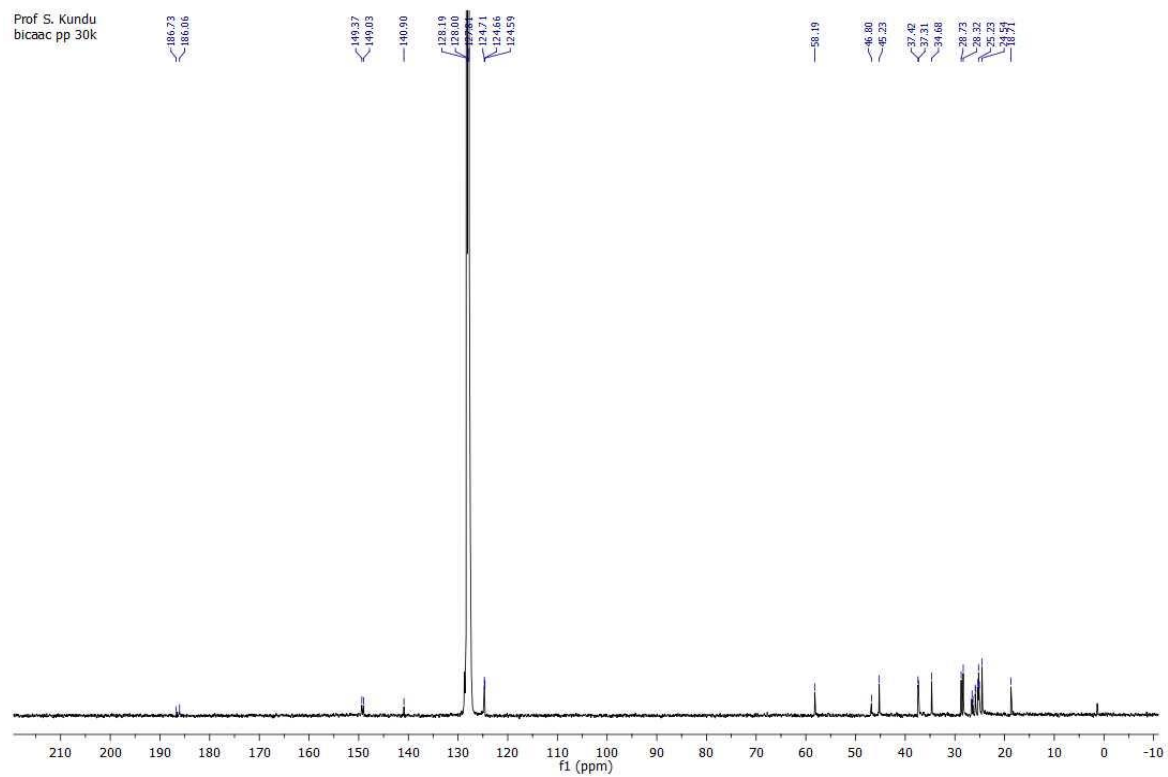

S15: <sup>13</sup>C NMR of compound 4

Fig

## HRMS Data:

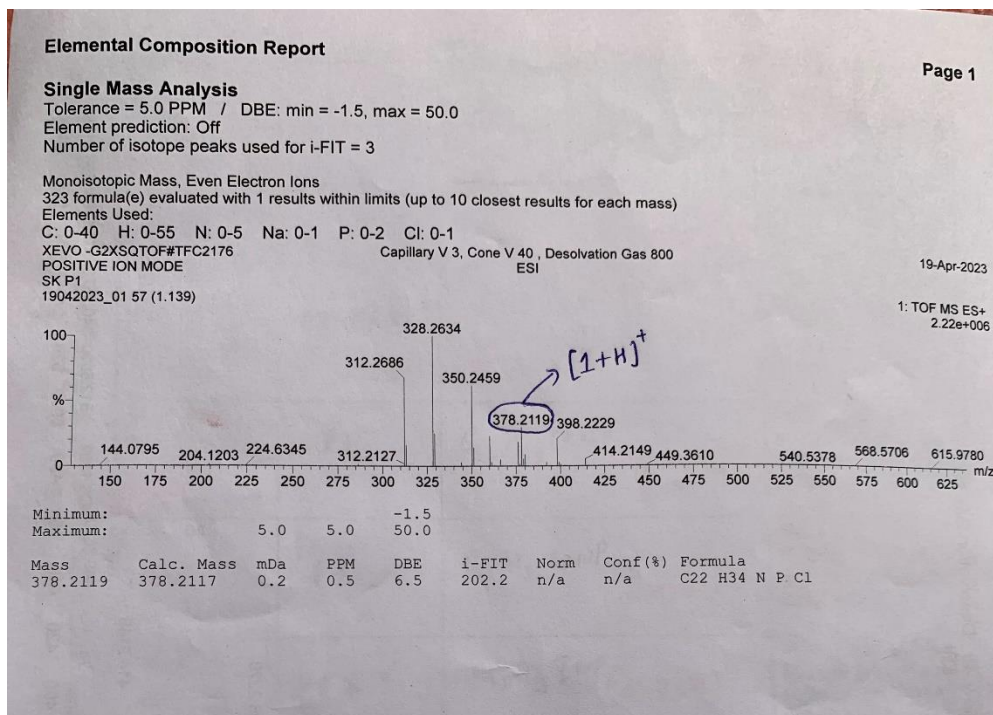

Fig S16: HRMS of compound 1

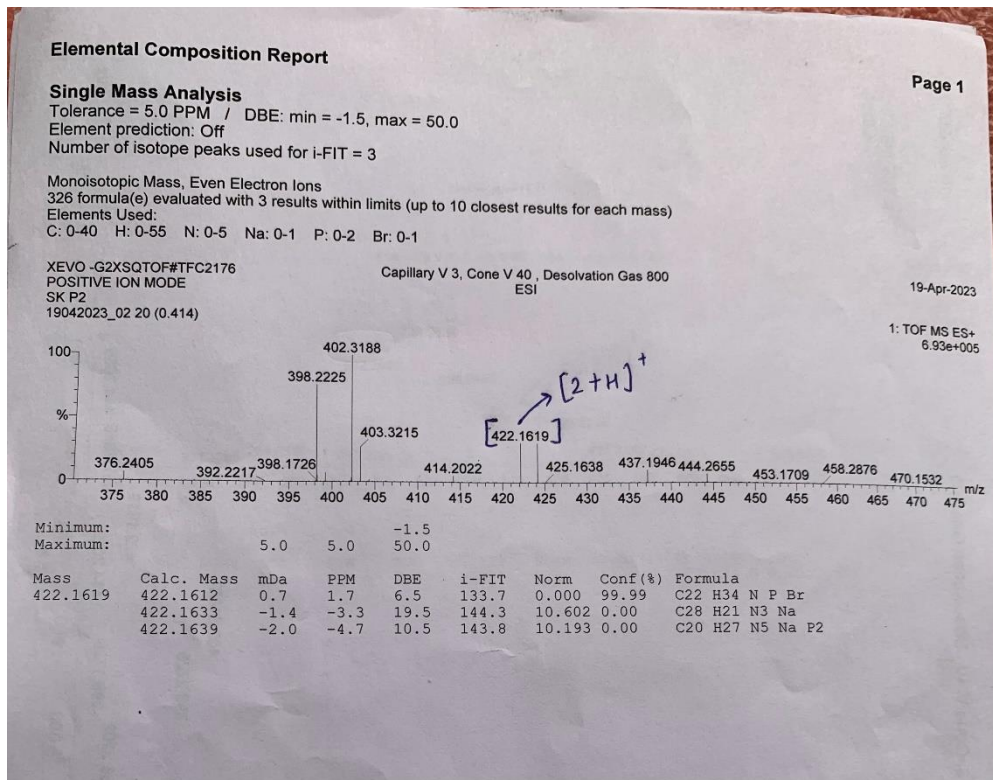

Fig S17: HRMS of compound 2.

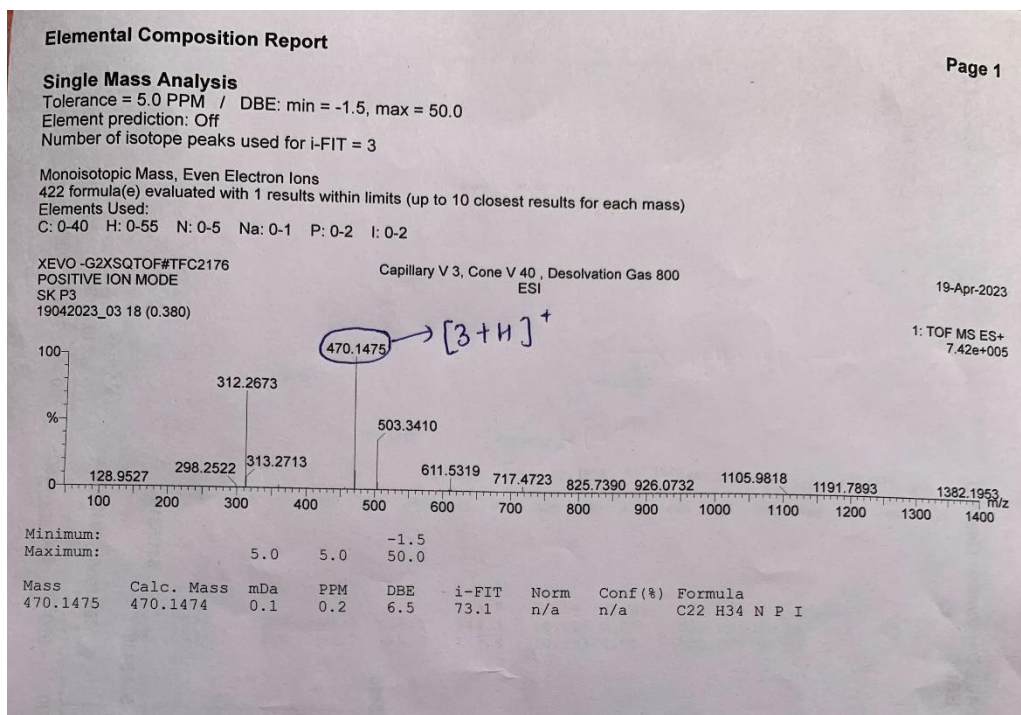

Fig S18: HRMS of compound 3.

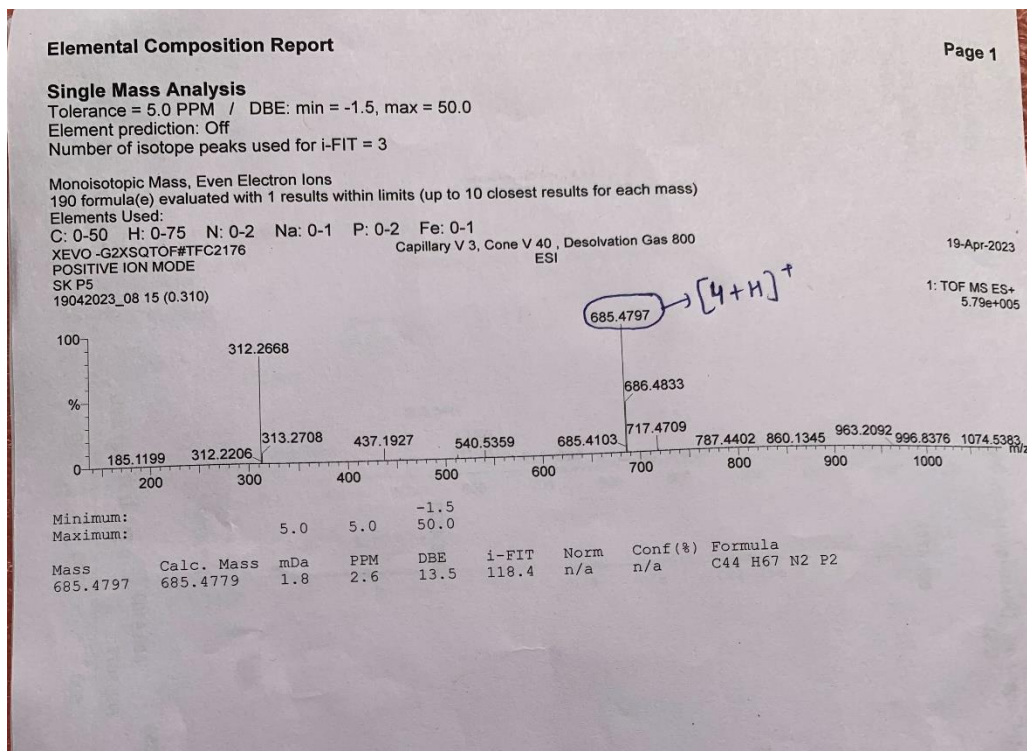

Fig S19: HRMS of compound 4.

## Cyclic Voltammetry:

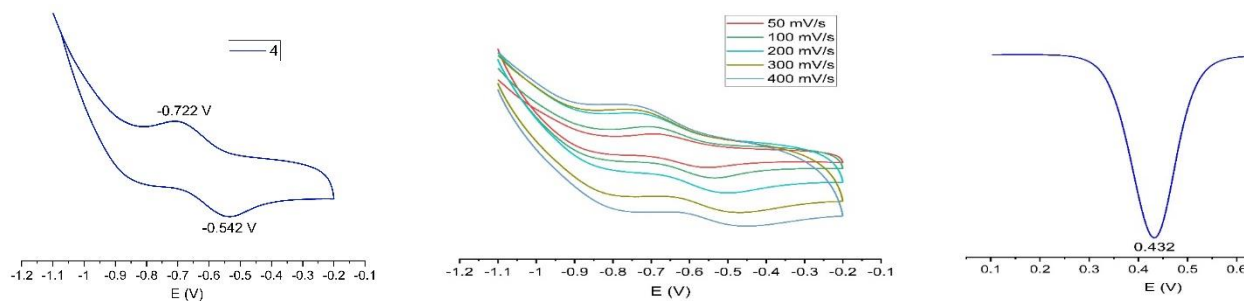

Fig S20: Cyclic Voltammogram (left) at scan rate = 0.1 V/s, Multiple oxidative scan (middle) of THF solution of compound **4** showing  $E_{1/2}$  at  $-0.20$  V versus  $Fc^+/Fc$  and Differential pulse voltammetry (DPV) of ferrocene (mM) (right) against the  $Bu_4NPF_6$  (0.1 M) as the supporting electrolyte (scan rate = 0.1 V/s).

## Theoretical Studies

### 1. Roby-Gould Bond Indices (RGI) analysis

Roby-Gould method gives two independent covalent and ionic bond indices utilizing the expectation values of quantum mechanical operators and are based on well-known ideas of bonding and antibonding orbitals. This method depends upon the partitioning of either real space or Hilbert space (in case of RGI), which is non-unique.

For RGI analysis, geometry was optimized for **1,2** and **4** by using the *Gaussian09* program<sup>S8</sup> at B3LYP/6-311G(d,p) followed by single point energy calculation on optimized geometry of **1,2,4** and crystal geometry of **3** at B3LYP/def2-TZVP. The Roby-Gould Bond Indices (RGI) of all the molecules were calculated at B3LYP/def2-TZVP level with *TONTO* program.<sup>S16</sup>

The covalent bond index ( $c$ ), ionic bond index ( $i$ ), total bond order ( $\tau$ ), and percentage covalency for different bonds in **1-4** compounds are reported.

**Table S6.** Roby-Gould bond indices for different bonds in  $(BICAAC)_2$  PCI (**1**).

| Atoms A-B | $d_{AB}$ (Å) | $c$  | $i$   | $\tau$ | % Covalency |
|-----------|--------------|------|-------|--------|-------------|
| Cl--P     | 2.15         | 0.86 | 0.74  | 1.13   | 57.61       |
| P--C12    | 1.73         | 1.61 | -0.17 | 1.62   | 98.9        |
| N--C2     | 1.45         | 1.07 | 0.29  | 1.11   | 93.17       |
| N--C8     | 1.51         | 0.97 | 0.27  | 1      | 92.91       |
| N--C12    | 1.37         | 1.42 | 0.33  | 1.46   | 95          |
| C1--C3    | 1.53         | 1.07 | 0.1   | 1.07   | 99.11       |
| C1--C13   | 1.54         | 1.04 | -0.09 | 1.04   | 99.24       |
| C1--C21   | 1.54         | 1.03 | -0.09 | 1.03   | 99.25       |
| C2--C3    | 1.41         | 1.5  | -0.02 | 1.5    | 99.98       |

|          |      |      |       |      |       |
|----------|------|------|-------|------|-------|
| C2--C7   | 1.41 | 1.51 | -0.02 | 1.51 | 99.98 |
| C3--C4   | 1.4  | 1.54 | -0.05 | 1.55 | 99.88 |
| C4--C5   | 1.39 | 1.59 | 0.01  | 1.59 | 100   |
| C5--C6   | 1.39 | 1.57 | 0     | 1.57 | 100   |
| C6--C7   | 1.4  | 1.54 | 0.05  | 1.54 | 99.88 |
| C7--C14  | 1.53 | 1.05 | -0.1  | 1.06 | 99.1  |
| C8--C9   | 1.54 | 1.01 | -0.15 | 1.02 | 97.84 |
| C8--C16  | 1.53 | 1.05 | -0.21 | 1.07 | 96.22 |
| C8--C17  | 1.54 | 1.02 | -0.15 | 1.03 | 98.02 |
| C9--C10  | 1.54 | 1.01 | 0.01  | 1.01 | 100   |
| C10--C11 | 1.56 | 1.01 | 0.09  | 1.02 | 99.14 |
| C11--C12 | 1.55 | 1.08 | 0.09  | 1.08 | 99.25 |
| C11--C18 | 1.57 | 1    | -0.04 | 1    | 99.8  |
| C11--C20 | 1.54 | 1.04 | -0.17 | 1.06 | 97.56 |
| C14--C15 | 1.54 | 1.04 | -0.1  | 1.04 | 99.1  |
| C14--C22 | 1.54 | 1.03 | -0.09 | 1.04 | 99.29 |
| C17--C18 | 1.55 | 1    | 0.05  | 1    | 99.74 |
| C18--C19 | 1.53 | 1.05 | -0.12 | 1.06 | 98.73 |
| C1--H1   | 1.09 | 0.87 | 0.15  | 0.88 | 97.1  |
| C4--H2   | 1.08 | 0.9  | 0.16  | 0.92 | 97.02 |
| C5--H3   | 1.08 | 0.91 | 0.17  | 0.92 | 96.66 |
| C6--H4   | 1.08 | 0.9  | 0.16  | 0.92 | 97.03 |
| C9--H5   | 1.09 | 0.9  | 0.16  | 0.91 | 96.98 |
| C9--H6   | 1.09 | 0.91 | 0.16  | 0.92 | 96.86 |
| C10--H7  | 1.09 | 0.91 | 0.16  | 0.92 | 96.83 |
| C10--H8  | 1.09 | 0.91 | 0.17  | 0.92 | 96.68 |
| C13--H9  | 1.09 | 0.92 | 0.16  | 0.94 | 97.04 |
| C13--H10 | 1.09 | 0.91 | 0.17  | 0.92 | 96.58 |
| C13--H11 | 1.09 | 0.92 | 0.15  | 0.93 | 97.26 |
| C14--H12 | 1.09 | 0.87 | 0.15  | 0.89 | 97.03 |
| C15--H13 | 1.09 | 0.92 | 0.16  | 0.93 | 96.96 |
| C15--H14 | 1.09 | 0.91 | 0.15  | 0.92 | 97.39 |
| C15--H15 | 1.09 | 0.92 | 0.16  | 0.93 | 97.06 |
| C16--H16 | 1.09 | 0.92 | 0.17  | 0.93 | 96.86 |
| C16--H17 | 1.09 | 0.91 | 0.16  | 0.92 | 97.01 |
| C16--H18 | 1.09 | 0.91 | 0.16  | 0.92 | 97    |
| C17--H19 | 1.09 | 0.89 | 0.15  | 0.91 | 97.1  |
| C17--H20 | 1.09 | 0.91 | 0.16  | 0.92 | 96.89 |
| C18--H21 | 1.1  | 0.89 | 0.16  | 0.91 | 96.76 |
| C19--H22 | 1.09 | 0.92 | 0.16  | 0.94 | 96.95 |
| C19--H23 | 1.09 | 0.92 | 0.16  | 0.93 | 96.96 |
| C19--H24 | 1.09 | 0.91 | 0.16  | 0.93 | 96.99 |
| C20--H25 | 1.09 | 0.91 | 0.16  | 0.93 | 96.88 |

|          |      |      |      |      |       |
|----------|------|------|------|------|-------|
| C20--H26 | 1.09 | 0.92 | 0.16 | 0.93 | 96.94 |
| C20--H27 | 1.09 | 0.92 | 0.17 | 0.93 | 96.74 |
| C21--H28 | 1.09 | 0.92 | 0.16 | 0.94 | 96.95 |
| C21--H29 | 1.09 | 0.92 | 0.16 | 0.93 | 97.1  |
| C21--H30 | 1.09 | 0.91 | 0.15 | 0.93 | 97.33 |
| C22--H31 | 1.09 | 0.92 | 0.16 | 0.93 | 97.08 |
| C22--H32 | 1.09 | 0.92 | 0.15 | 0.93 | 97.24 |
| C22--H33 | 1.09 | 0.91 | 0.17 | 0.93 | 96.55 |

**Table S7.** Roby-Gould bond indices for different bonds in (BICAAC)<sub>2</sub>PBr (**2**).

| Atoms A-B | $d_{AB}(\text{Å})$ | $c$  | $i$   | $\tau$ | % Covalency |
|-----------|--------------------|------|-------|--------|-------------|
| Br--P     | 2.31               | 0.87 | 0.72  | 1.13   | 58.85       |
| P--C18    | 1.73               | 1.62 | -0.14 | 1.62   | 99.3        |
| N--C2     | 1.45               | 1.07 | 0.29  | 1.11   | 93.37       |
| N--C8     | 1.51               | 0.97 | 0.27  | 1.01   | 92.66       |
| N--C18    | 1.37               | 1.43 | 0.34  | 1.46   | 94.75       |
| C1--C8    | 1.53               | 1.05 | 0.21  | 1.07   | 96.08       |
| C2--C3    | 1.41               | 1.51 | -0.02 | 1.51   | 99.99       |
| C2--C7    | 1.41               | 1.51 | -0.02 | 1.51   | 99.99       |
| C3--C4    | 1.4                | 1.55 | -0.06 | 1.55   | 99.87       |
| C3--C14   | 1.53               | 1.07 | -0.1  | 1.07   | 99.17       |
| C4--C5    | 1.39               | 1.59 | 0.01  | 1.59   | 100         |
| C5--C6    | 1.39               | 1.58 | 0     | 1.58   | 100         |
| C6--C7    | 1.4                | 1.55 | 0.05  | 1.55   | 99.88       |
| C7--C16   | 1.53               | 1.06 | -0.09 | 1.06   | 99.23       |
| C8--C9    | 1.54               | 1.02 | -0.15 | 1.03   | 97.81       |
| C8--C13   | 1.54               | 1.02 | -0.14 | 1.03   | 98.05       |
| C9--C10   | 1.54               | 1.01 | 0.01  | 1.01   | 100         |
| C10--C11  | 1.55               | 1    | 0.1   | 1.01   | 99.04       |
| C11--C12  | 1.57               | 1    | -0.04 | 1      | 99.81       |
| C11--C18  | 1.55               | 1.08 | 0.1   | 1.08   | 99.21       |
| C11--C19  | 1.54               | 1.04 | -0.17 | 1.05   | 97.47       |
| C12--C13  | 1.55               | 1    | -0.05 | 1      | 99.72       |
| C12--C20  | 1.53               | 1.04 | -0.12 | 1.05   | 98.75       |
| C14--C15  | 1.54               | 1.03 | -0.09 | 1.03   | 99.25       |
| C14--C21  | 1.54               | 1.03 | -0.09 | 1.04   | 99.28       |
| C16--C17  | 1.54               | 1.03 | -0.1  | 1.04   | 99.06       |
| C16--C22  | 1.54               | 1.03 | -0.09 | 1.04   | 99.26       |
| C1--H1    | 1.09               | 0.92 | 0.16  | 0.93   | 96.88       |
| C1--H2    | 1.09               | 0.91 | 0.16  | 0.92   | 96.98       |
| C1--H3    | 1.09               | 0.9  | 0.16  | 0.92   | 97.07       |
| C4--H4    | 1.08               | 0.9  | 0.16  | 0.91   | 97.01       |

|          |      |      |      |      |       |
|----------|------|------|------|------|-------|
| C5--H5   | 1.08 | 0.91 | 0.17 | 0.93 | 96.6  |
| C6--H6   | 1.08 | 0.9  | 0.16 | 0.92 | 97    |
| C9--H7   | 1.09 | 0.91 | 0.16 | 0.92 | 96.85 |
| C9--H8   | 1.09 | 0.9  | 0.16 | 0.91 | 96.93 |
| C10--H9  | 1.09 | 0.9  | 0.17 | 0.92 | 96.75 |
| C10--H10 | 1.09 | 0.91 | 0.17 | 0.92 | 96.78 |
| C12--H11 | 1.1  | 0.9  | 0.16 | 0.91 | 96.75 |
| C13--H12 | 1.09 | 0.91 | 0.16 | 0.92 | 96.89 |
| C13--H13 | 1.09 | 0.89 | 0.15 | 0.91 | 97.18 |
| C14--H14 | 1.09 | 0.87 | 0.15 | 0.89 | 97.02 |
| C15--H15 | 1.09 | 0.92 | 0.16 | 0.94 | 96.96 |
| C15--H16 | 1.09 | 0.92 | 0.16 | 0.93 | 97.09 |
| C15--H17 | 1.09 | 0.91 | 0.15 | 0.93 | 97.34 |
| C16--H18 | 1.09 | 0.87 | 0.15 | 0.88 | 97.08 |
| C17--H19 | 1.09 | 0.92 | 0.16 | 0.93 | 96.95 |
| C17--H20 | 1.09 | 0.91 | 0.15 | 0.92 | 97.43 |
| C17--H21 | 1.09 | 0.92 | 0.16 | 0.93 | 97.06 |
| C19--H22 | 1.09 | 0.91 | 0.16 | 0.93 | 96.86 |
| C19--H23 | 1.09 | 0.91 | 0.17 | 0.93 | 96.78 |
| C19--H24 | 1.09 | 0.92 | 0.16 | 0.93 | 96.91 |
| C20--H25 | 1.09 | 0.92 | 0.16 | 0.93 | 97.01 |
| C20--H26 | 1.09 | 0.91 | 0.16 | 0.93 | 96.96 |
| C20--H27 | 1.09 | 0.91 | 0.16 | 0.93 | 97.04 |
| C21--H28 | 1.09 | 0.92 | 0.16 | 0.94 | 97.06 |
| C21--H29 | 1.09 | 0.91 | 0.17 | 0.92 | 96.6  |
| C21--H30 | 1.09 | 0.92 | 0.15 | 0.93 | 97.26 |
| C22--H31 | 1.09 | 0.92 | 0.16 | 0.93 | 97.07 |
| C22--H32 | 1.09 | 0.92 | 0.16 | 0.93 | 97.21 |
| C22--H33 | 1.09 | 0.91 | 0.17 | 0.92 | 96.57 |

**Table S8.** Roby-Gould bond indices for different bonds in (BICAAC)<sub>2</sub>PI (**3**)

| Atoms A-B | $d_{AB}(\text{Å})$ | $c$  | $i$   | $\tau$ | % Covalency |
|-----------|--------------------|------|-------|--------|-------------|
| P--C9     | 1.72               | 1.64 | -0.11 | 1.64   | 99.51       |
| N--C2     | 1.45               | 1.06 | 0.3   | 1.1    | 92.73       |
| N--C4     | 1.51               | 0.97 | 0.28  | 1.01   | 92.51       |
| N--C9     | 1.36               | 1.43 | 0.32  | 1.47   | 95.25       |
| C1--C2    | 1.4                | 1.5  | 0.02  | 1.5    | 99.99       |
| C1--C5    | 1.51               | 1.06 | -0.13 | 1.07   | 98.6        |
| C1--C7    | 1.39               | 1.52 | -0.08 | 1.53   | 99.7        |
| C2--C3    | 1.39               | 1.51 | -0.02 | 1.51   | 99.98       |
| C3--C8    | 1.5                | 1.06 | -0.12 | 1.07   | 98.72       |



|          |      |      |       |      |       |
|----------|------|------|-------|------|-------|
| C3--C11  | 1.39 | 1.52 | -0.08 | 1.52 | 99.74 |
| C4--C6   | 1.53 | 1    | -0.28 | 1.04 | 92.61 |
| C4--C12  | 1.52 | 1    | -0.19 | 1.02 | 96.45 |
| C4--C13  | 1.52 | 1    | -0.19 | 1.02 | 96.4  |
| C5--C14  | 1.53 | 0.96 | -0.15 | 0.97 | 97.59 |
| C5--C16  | 1.53 | 0.97 | -0.15 | 0.98 | 97.73 |
| C7--C10  | 1.37 | 1.55 | 0     | 1.55 | 100   |
| C8--C17  | 1.53 | 0.97 | -0.16 | 0.98 | 97.47 |
| C8--C20  | 1.54 | 0.97 | -0.15 | 0.98 | 97.79 |
| C9--C15  | 1.54 | 1.08 | -0.08 | 1.08 | 99.5  |
| C10--C11 | 1.37 | 1.54 | 0     | 1.54 | 100   |
| C12--C18 | 1.54 | 0.95 | 0.06  | 0.95 | 99.63 |
| C13--C19 | 1.55 | 0.95 | 0.01  | 0.95 | 100   |
| C15--C18 | 1.53 | 1    | -0.09 | 1    | 99.25 |
| C15--C19 | 1.54 | 1    | -0.14 | 1    | 98.09 |
| C15--C21 | 1.56 | 0.97 | -0.23 | 1    | 94.66 |
| C18--C22 | 1.47 | 1    | -0.16 | 1.02 | 97.52 |
| C5--H1   | 0.98 | 0.88 | 0.16  | 0.89 | 96.69 |
| C6--H2   | 0.96 | 0.91 | 0.17  | 0.92 | 96.41 |
| C6--H3   | 0.96 | 0.92 | 0.18  | 0.94 | 96.15 |
| C6--H4   | 0.96 | 0.91 | 0.18  | 0.93 | 96.31 |
| C7--H5   | 0.93 | 0.9  | 0.17  | 0.91 | 96.38 |
| C8--H6   | 0.98 | 0.87 | 0.16  | 0.89 | 96.76 |
| C10--H7  | 0.93 | 0.9  | 0.18  | 0.92 | 96    |
| C11--H8  | 0.93 | 0.9  | 0.17  | 0.91 | 96.37 |
| C12--H9  | 0.97 | 0.89 | 0.17  | 0.91 | 96.63 |
| C12--H10 | 0.97 | 0.91 | 0.18  | 0.93 | 96.28 |
| C13--H11 | 0.97 | 0.91 | 0.18  | 0.93 | 96.27 |
| C13--H12 | 0.97 | 0.9  | 0.17  | 0.91 | 96.43 |
| C14--H13 | 0.96 | 0.92 | 0.18  | 0.93 | 96.43 |
| C14--H14 | 0.96 | 0.92 | 0.18  | 0.94 | 96.28 |
| C14--H15 | 0.96 | 0.91 | 0.17  | 0.93 | 96.47 |
| C16--H16 | 0.96 | 0.9  | 0.18  | 0.92 | 96.12 |
| C16--H17 | 0.96 | 0.92 | 0.18  | 0.93 | 96.34 |
| C16--H18 | 0.96 | 0.92 | 0.18  | 0.94 | 96.45 |
| C17--H19 | 0.96 | 0.92 | 0.18  | 0.93 | 96.46 |
| C17--H20 | 0.96 | 0.92 | 0.18  | 0.94 | 96.26 |
| C17--H21 | 0.96 | 0.92 | 0.18  | 0.93 | 96.41 |
| C18--H22 | 0.98 | 0.89 | 0.18  | 0.91 | 96.07 |
| C19--H23 | 0.97 | 0.91 | 0.18  | 0.92 | 96.04 |
| C19--H24 | 0.97 | 0.91 | 0.18  | 0.93 | 96.18 |
| C20--H25 | 0.96 | 0.92 | 0.17  | 0.94 | 96.52 |



|          |      |      |      |      |       |
|----------|------|------|------|------|-------|
| C20--H26 | 0.96 | 0.92 | 0.18 | 0.94 | 96.33 |
| C20--H27 | 0.96 | 0.91 | 0.18 | 0.92 | 96.09 |
| C21--H28 | 0.96 | 0.91 | 0.17 | 0.92 | 96.44 |
| C21--H29 | 0.96 | 0.91 | 0.18 | 0.93 | 96.29 |
| C21--H30 | 0.96 | 0.92 | 0.19 | 0.93 | 96.07 |
| C22--H31 | 0.96 | 0.91 | 0.18 | 0.93 | 96.25 |
| C22--H32 | 0.96 | 0.91 | 0.18 | 0.92 | 96.38 |
| C22--H33 | 0.96 | 0.91 | 0.18 | 0.93 | 96.35 |

**Table S9.** Roby-Gould bond indices for different bonds in (BICAAC)<sub>2</sub>P<sub>2</sub> (**4**)

| Atoms A-B | $d_{AB}(\text{Å})$ | $c$  | $i$   | $\tau$ | % Covalency |
|-----------|--------------------|------|-------|--------|-------------|
| P1--P2    | 2.23               | 1.07 | 0     | 1.07   | 100         |
| P1--C6    | 1.75               | 1.59 | 0.03  | 1.59   | 99.97       |
| P2--C28   | 1.75               | 1.6  | 0.04  | 1.6    | 99.95       |
| N1--C3    | 1.45               | 1.08 | 0.29  | 1.12   | 93.45       |
| N1--C6    | 1.39               | 1.4  | 0.35  | 1.45   | 94.06       |
| N1--C11   | 1.52               | 0.97 | 0.27  | 1.01   | 92.77       |
| N2--C25   | 1.45               | 1.08 | 0.29  | 1.12   | 93.37       |
| N2--C28   | 1.39               | 1.4  | 0.36  | 1.44   | 93.76       |
| N2--C33   | 1.52               | 0.97 | 0.27  | 1.01   | 92.63       |
| C1--C2    | 1.4                | 1.55 | 0.05  | 1.55   | 99.89       |
| C1--C5    | 1.39               | 1.58 | 0     | 1.58   | 100         |
| C2--C3    | 1.42               | 1.51 | 0.02  | 1.51   | 99.97       |
| C2--C12   | 1.53               | 1.06 | -0.09 | 1.06   | 99.23       |
| C3--C4    | 1.42               | 1.5  | -0.02 | 1.5    | 99.98       |
| C4--C7    | 1.53               | 1.06 | -0.1  | 1.07   | 99.15       |
| C4--C9    | 1.4                | 1.55 | -0.06 | 1.55   | 99.86       |
| C5--C9    | 1.39               | 1.58 | 0     | 1.58   | 100         |
| C6--C13   | 1.6                | 1.06 | -0.11 | 1.06   | 98.99       |
| C7--C15   | 1.54               | 1.03 | -0.09 | 1.04   | 99.23       |
| C7--C17   | 1.54               | 1.03 | -0.09 | 1.04   | 99.27       |
| C8--C11   | 1.53               | 1.03 | 0.16  | 1.04   | 97.68       |
| C8--C19   | 1.52               | 1.03 | 0.05  | 1.03   | 99.72       |
| C10--C11  | 1.54               | 1.03 | 0.2   | 1.05   | 96.27       |
| C11--C16  | 1.55               | 1.02 | -0.2  | 1.04   | 96.12       |
| C12--C14  | 1.54               | 1.03 | -0.09 | 1.04   | 99.18       |
| C12--C18  | 1.54               | 1.03 | -0.09 | 1.04   | 99.17       |
| C13--C19  | 1.56               | 0.99 | -0.07 | 0.99   | 99.53       |
| C13--C20  | 1.55               | 1.03 | -0.16 | 1.04   | 97.72       |
| C13--C22  | 1.55               | 1.02 | -0.16 | 1.04   | 97.64       |

|          |      |      |       |      |       |
|----------|------|------|-------|------|-------|
| C19--C21 | 1.54 | 1.04 | -0.11 | 1.05 | 98.93 |
| C23--C24 | 1.4  | 1.55 | 0.05  | 1.55 | 99.87 |
| C23--C27 | 1.39 | 1.59 | 0     | 1.59 | 100   |
| C24--C25 | 1.42 | 1.51 | 0.02  | 1.51 | 99.97 |
| C24--C34 | 1.53 | 1.06 | -0.09 | 1.07 | 99.23 |
| C25--C26 | 1.42 | 1.51 | -0.02 | 1.51 | 99.98 |
| C26--C29 | 1.53 | 1.06 | -0.1  | 1.07 | 99.18 |
| C26--C31 | 1.4  | 1.55 | -0.06 | 1.55 | 99.87 |
| C27--C31 | 1.39 | 1.58 | 0     | 1.58 | 100   |
| C28--C35 | 1.6  | 1.05 | -0.11 | 1.06 | 98.89 |
| C29--C37 | 1.54 | 1.04 | -0.1  | 1.04 | 99.13 |
| C29--C39 | 1.54 | 1.03 | -0.09 | 1.04 | 99.18 |
| C30--C33 | 1.53 | 1.02 | 0.15  | 1.03 | 97.79 |
| C30--C41 | 1.52 | 1.03 | 0.05  | 1.03 | 99.76 |
| C32--C33 | 1.54 | 1.04 | 0.21  | 1.06 | 96.16 |
| C33--C38 | 1.55 | 1.02 | -0.21 | 1.04 | 95.88 |
| C34--C36 | 1.54 | 1.03 | -0.09 | 1.03 | 99.23 |
| C34--C40 | 1.54 | 1.03 | -0.09 | 1.03 | 99.18 |
| C35--C41 | 1.56 | 0.99 | -0.06 | 0.99 | 99.6  |
| C35--C42 | 1.55 | 1.04 | -0.16 | 1.05 | 97.7  |
| C35--C44 | 1.55 | 1.03 | -0.16 | 1.04 | 97.63 |
| C41--C43 | 1.54 | 1.04 | -0.1  | 1.05 | 99    |
| C1--H1   | 1.08 | 0.9  | 0.16  | 0.92 | 97.1  |
| C5--H2   | 1.08 | 0.91 | 0.17  | 0.93 | 96.73 |
| C7--H3   | 1.09 | 0.87 | 0.15  | 0.88 | 97.09 |
| C8--H4   | 1.1  | 0.89 | 0.15  | 0.9  | 97.29 |
| C8--H5   | 1.1  | 0.9  | 0.16  | 0.92 | 97.06 |
| C9--H6   | 1.08 | 0.9  | 0.15  | 0.91 | 97.12 |
| C10--H7  | 1.09 | 0.92 | 0.16  | 0.93 | 96.97 |
| C10--H8  | 1.09 | 0.9  | 0.15  | 0.91 | 97.28 |
| C10--H9  | 1.09 | 0.91 | 0.16  | 0.92 | 97.04 |
| C12--H10 | 1.09 | 0.87 | 0.16  | 0.89 | 96.85 |
| C14--H12 | 1.09 | 0.89 | 0.16  | 0.91 | 96.96 |
| C14--H13 | 1.09 | 0.92 | 0.16  | 0.93 | 97.16 |
| C14--H14 | 1.09 | 0.92 | 0.15  | 0.93 | 97.36 |
| C15--H15 | 1.09 | 0.92 | 0.16  | 0.93 | 97.14 |
| C15--H16 | 1.09 | 0.91 | 0.15  | 0.93 | 97.27 |
| C15--H17 | 1.09 | 0.92 | 0.16  | 0.93 | 97.02 |
| C16--H18 | 1.09 | 0.9  | 0.15  | 0.91 | 97.26 |
| C16--H19 | 1.09 | 0.91 | 0.16  | 0.93 | 97.14 |
| C16--H20 | 1.09 | 0.92 | 0.16  | 0.93 | 97.12 |
| C17--H21 | 1.09 | 0.92 | 0.16  | 0.93 | 97.15 |

|          |      |      |      |      |       |
|----------|------|------|------|------|-------|
| C17--H22 | 1.09 | 0.9  | 0.16 | 0.92 | 96.9  |
| C17--H23 | 1.09 | 0.92 | 0.15 | 0.93 | 97.24 |
| C18--H24 | 1.09 | 0.92 | 0.16 | 0.93 | 97.1  |
| C18--H25 | 1.09 | 0.92 | 0.16 | 0.93 | 96.99 |
| C18--H26 | 1.09 | 0.91 | 0.15 | 0.92 | 97.37 |
| C19--H27 | 1.09 | 0.88 | 0.15 | 0.89 | 97.15 |
| C20--H11 | 1.09 | 0.92 | 0.16 | 0.93 | 97.23 |
| C20--H28 | 1.09 | 0.9  | 0.16 | 0.91 | 96.92 |
| C20--H29 | 1.09 | 0.91 | 0.15 | 0.92 | 97.4  |
| C21--H30 | 1.09 | 0.92 | 0.16 | 0.93 | 96.96 |
| C21--H31 | 1.09 | 0.91 | 0.16 | 0.93 | 97.18 |
| C21--H32 | 1.09 | 0.92 | 0.16 | 0.93 | 97.12 |
| C22--H33 | 1.09 | 0.91 | 0.15 | 0.92 | 97.23 |
| C22--H34 | 1.09 | 0.9  | 0.16 | 0.92 | 96.84 |
| C22--H35 | 1.09 | 0.91 | 0.14 | 0.92 | 97.57 |
| C23--H36 | 1.08 | 0.9  | 0.15 | 0.91 | 97.15 |
| C27--H37 | 1.08 | 0.91 | 0.17 | 0.93 | 96.71 |
| C29--H38 | 1.09 | 0.87 | 0.15 | 0.88 | 97.18 |
| C30--H39 | 1.1  | 0.89 | 0.15 | 0.91 | 97.18 |
| C30--H40 | 1.1  | 0.9  | 0.16 | 0.92 | 97.06 |
| C31--H41 | 1.08 | 0.9  | 0.16 | 0.92 | 97.06 |
| C32--H42 | 1.09 | 0.92 | 0.16 | 0.93 | 96.97 |
| C32--H43 | 1.09 | 0.91 | 0.15 | 0.92 | 97.16 |
| C32--H44 | 1.09 | 0.9  | 0.16 | 0.92 | 97.1  |
| C34--H45 | 1.09 | 0.88 | 0.16 | 0.89 | 96.74 |
| C36--H47 | 1.09 | 0.89 | 0.16 | 0.91 | 97.01 |
| C36--H48 | 1.09 | 0.92 | 0.16 | 0.93 | 97.19 |
| C36--H49 | 1.09 | 0.92 | 0.15 | 0.93 | 97.32 |
| C37--H50 | 1.09 | 0.92 | 0.16 | 0.93 | 97.2  |
| C37--H51 | 1.09 | 0.91 | 0.15 | 0.93 | 97.28 |
| C37--H52 | 1.09 | 0.92 | 0.16 | 0.93 | 96.98 |
| C38--H53 | 1.09 | 0.89 | 0.15 | 0.91 | 97.31 |
| C38--H54 | 1.09 | 0.91 | 0.15 | 0.93 | 97.2  |
| C38--H55 | 1.09 | 0.92 | 0.16 | 0.94 | 97.06 |
| C39--H56 | 1.09 | 0.92 | 0.16 | 0.93 | 97.1  |
| C39--H57 | 1.09 | 0.9  | 0.16 | 0.92 | 96.85 |
| C39--H58 | 1.09 | 0.92 | 0.15 | 0.93 | 97.27 |
| C40--H59 | 1.09 | 0.92 | 0.16 | 0.93 | 97.05 |
| C40--H60 | 1.09 | 0.92 | 0.16 | 0.93 | 97    |
| C40--H61 | 1.09 | 0.91 | 0.15 | 0.92 | 97.35 |
| C41--H62 | 1.09 | 0.88 | 0.16 | 0.9  | 96.98 |
| C42--H46 | 1.09 | 0.92 | 0.16 | 0.93 | 97.15 |

|          |      |      |      |      |       |
|----------|------|------|------|------|-------|
| C42--H63 | 1.09 | 0.9  | 0.16 | 0.91 | 96.86 |
| C42--H64 | 1.09 | 0.91 | 0.15 | 0.92 | 97.45 |
| C43--H65 | 1.09 | 0.92 | 0.16 | 0.93 | 96.96 |
| C43--H66 | 1.09 | 0.91 | 0.16 | 0.93 | 97.17 |
| C43--H67 | 1.09 | 0.92 | 0.16 | 0.93 | 97.04 |
| C44--H68 | 1.09 | 0.91 | 0.15 | 0.92 | 97.31 |
| C44--H69 | 1.09 | 0.91 | 0.17 | 0.92 | 96.76 |
| C44--H70 | 1.09 | 0.91 | 0.14 | 0.92 | 97.58 |

## 2. Electron localization function (ELF) and Local orbital locator (LOL) plots

The molecular wavefunctions for optimized geometry of **1,2,4** and crystal geometry of **3** were calculated at B3LYP/def2-TZVP(6d,10f) level. These wavefunctions were used to analyze electron density distribution and bonding features. Electron localization function (ELF)<sup>S9</sup> represents the regions where the electron is localized. Local Orbital Locator (LOL)<sup>S10</sup> represents the location of localized electronic groups which makes it easy to interpret the location of electron pairs and shells. ELF and LOL plots were made with the help of molecular wavefunctions by using *Multwfn*.<sup>S11</sup>

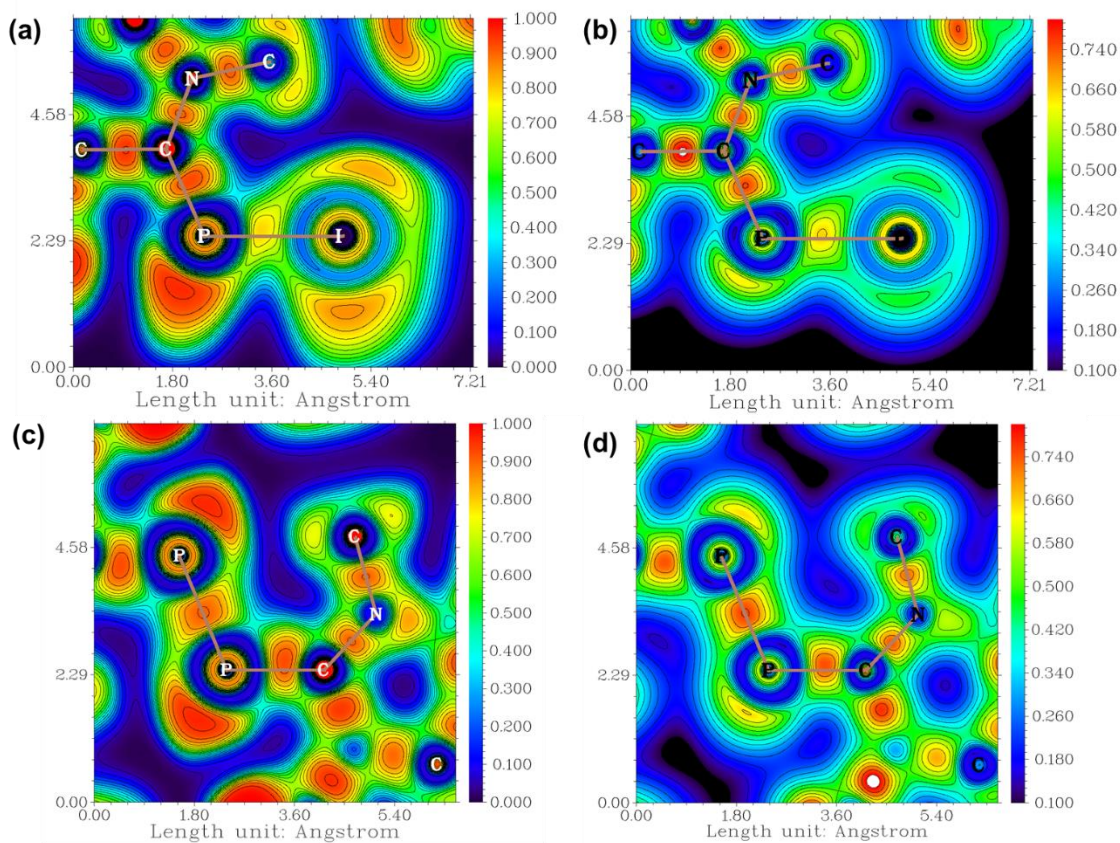

Figure S21: (a) ELF (b) LOL plots of **3** along C-P-I plane, (c) ELF (d) LOL plots of **4** along C-P-P plane.

### 3. QTAIM analysis

Electron density topological analysis was carried out using the *AIMALL* program<sup>S12</sup> to investigate the topological parameters such as the electronic charge density ( $\rho$ ), laplacian of electronic charge density ( $\nabla^2\rho$ ), ellipticity ( $\varepsilon$ ), bond path length ( $R_{ij}$ ), kinetic energy density ( $V$ ) and potential energy density ( $G$ ) for **1-4**. The molecular wavefunctions for optimized geometry of **1,2,4** and crystal geometry of **3** were calculated at B3LYP/def2-TZVP level.

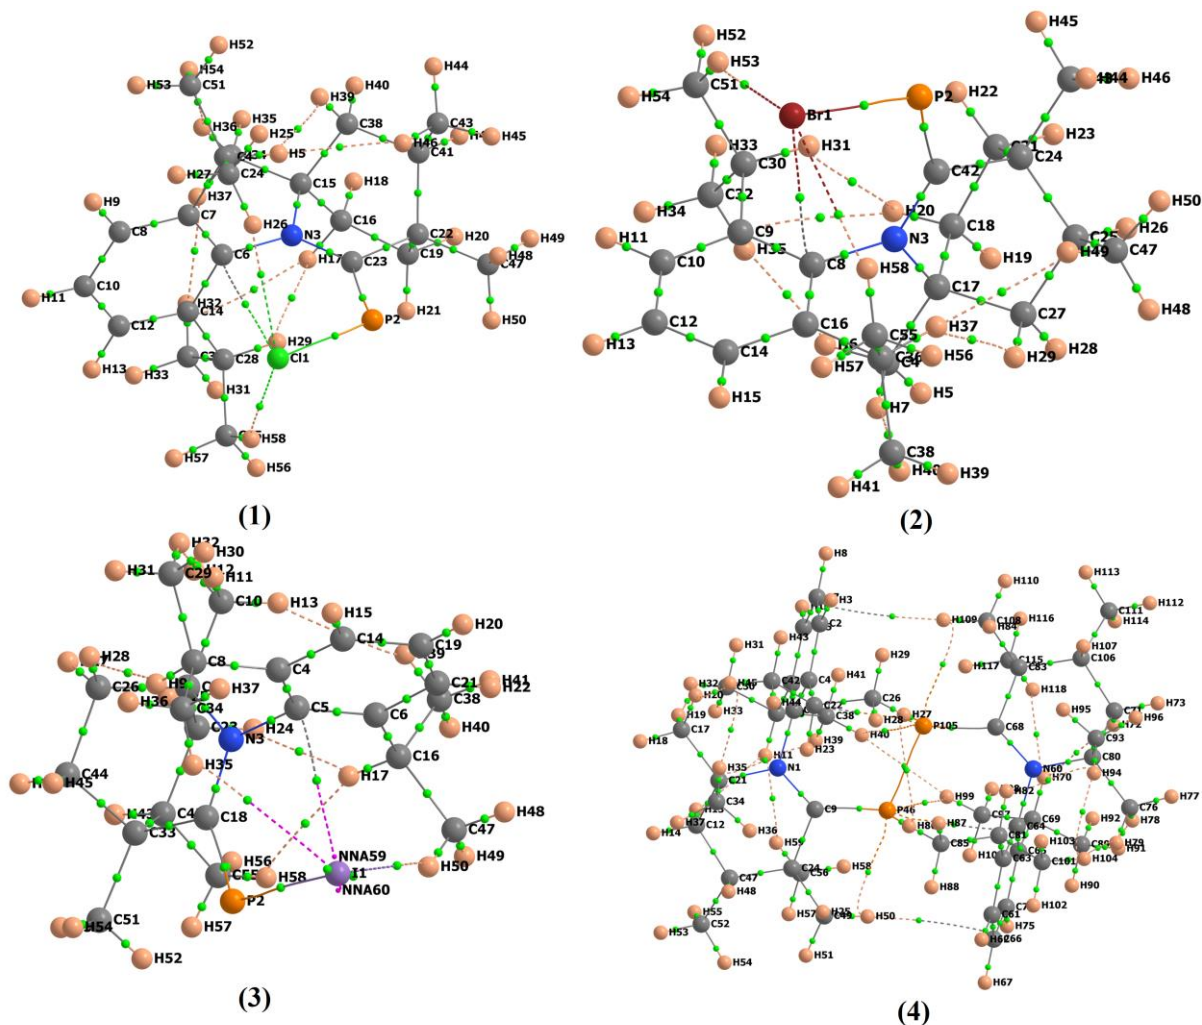

Figure S22: Molecular graphs of **1-4** obtained from electron density topology studies from QTAIM approach.

**Table S10.** Electron density topological descriptors for different bonding interactions in (BICAAC)PCI (**1**)

| Atoms     | $R_{ij}(\text{\AA})$ | $\rho(\text{e}\text{\AA}^{-3})$ | $\nabla^2\rho(\text{e}\text{\AA}^{-5})$ | $\varepsilon$ | $ V /G$ |
|-----------|----------------------|---------------------------------|-----------------------------------------|---------------|---------|
| C10 - C12 | 1.387                | 2.18                            | -23.48                                  | 0.198         | 4.279   |
| C10 - H11 | 1.069                | 1.94                            | -24.79                                  | 0.016         | 8.752   |
| C12 - C14 | 1.397                | 2.14                            | -22.51                                  | 0.199         | 4.229   |
| C12 - H13 | 1.069                | 1.93                            | -24.64                                  | 0.019         | 8.459   |
| C14 - C28 | 1.526                | 1.69                            | -15.51                                  | 0.020         | 4.705   |

|           |       |      |        |       |       |
|-----------|-------|------|--------|-------|-------|
| C15 - C16 | 1.543 | 1.66 | -14.81 | 0.024 | 4.674 |
| C15 - C34 | 1.526 | 1.70 | -15.64 | 0.014 | 4.758 |
| C15 - C38 | 1.541 | 1.67 | -15.00 | 0.023 | 4.696 |
| C16 - C19 | 1.539 | 1.64 | -14.48 | 0.001 | 4.655 |
| C16 - H17 | 1.076 | 1.91 | -23.73 | 0.007 | 7.784 |
| C16 - H18 | 1.080 | 1.89 | -23.20 | 0.008 | 7.582 |
| C19 - C22 | 1.555 | 1.60 | -13.63 | 0.008 | 4.482 |
| C19 - H20 | 1.080 | 1.89 | -23.24 | 0.009 | 7.646 |
| C19 - H21 | 1.078 | 1.90 | -23.58 | 0.009 | 7.846 |
| C22 - C23 | 1.548 | 1.62 | -13.96 | 0.034 | 4.420 |
| C22 - C41 | 1.566 | 1.57 | -13.16 | 0.009 | 4.473 |
| C22 - C47 | 1.537 | 1.65 | -14.72 | 0.004 | 4.653 |
| C24 - H25 | 1.080 | 1.87 | -22.79 | 0.011 | 7.510 |
| C24 - H26 | 1.076 | 1.90 | -23.68 | 0.010 | 8.087 |
| C24 - H27 | 1.080 | 1.87 | -22.81 | 0.011 | 7.481 |
| C28 - C30 | 1.540 | 1.63 | -14.28 | 0.015 | 4.617 |
| C28 - C55 | 1.541 | 1.62 | -14.21 | 0.013 | 4.606 |
| C28 - H29 | 1.076 | 1.93 | -24.19 | 0.005 | 7.840 |
| C30 - H31 | 1.080 | 1.87 | -22.86 | 0.009 | 7.583 |
| C30 - H32 | 1.079 | 1.88 | -22.97 | 0.010 | 7.537 |
| C30 - H33 | 1.080 | 1.87 | -22.91 | 0.008 | 7.578 |
| C34 - H35 | 1.079 | 1.88 | -22.93 | 0.008 | 7.544 |
| C34 - H36 | 1.075 | 1.90 | -23.48 | 0.010 | 7.777 |
| C34 - H37 | 1.075 | 1.90 | -23.45 | 0.010 | 7.790 |
| C38 - C41 | 1.550 | 1.62 | -14.06 | 0.006 | 4.629 |
| C38 - H39 | 1.077 | 1.90 | -23.58 | 0.007 | 7.711 |
| C38 - H40 | 1.080 | 1.89 | -23.17 | 0.007 | 7.578 |
| C4 - C24  | 1.542 | 1.62 | -14.18 | 0.013 | 4.602 |
| C4 - C51  | 1.540 | 1.63 | -14.28 | 0.015 | 4.615 |
| C4 - C7   | 1.526 | 1.69 | -15.50 | 0.019 | 4.702 |
| C4 - H5   | 1.075 | 1.94 | -24.26 | 0.004 | 7.834 |
| C41 - C43 | 1.532 | 1.66 | -14.87 | 0.009 | 4.671 |
| C41 - H42 | 1.083 | 1.90 | -23.33 | 0.004 | 7.586 |
| C43 - H44 | 1.080 | 1.87 | -22.78 | 0.009 | 7.485 |
| C43 - H45 | 1.077 | 1.89 | -23.19 | 0.011 | 7.654 |
| C43 - H46 | 1.079 | 1.88 | -23.05 | 0.009 | 7.707 |
| C47 - H48 | 1.075 | 1.90 | -23.50 | 0.012 | 7.816 |
| C47 - H49 | 1.081 | 1.87 | -22.70 | 0.010 | 7.439 |
| C47 - H50 | 1.077 | 1.89 | -23.27 | 0.011 | 7.779 |
| C51 - H52 | 1.080 | 1.87 | -22.88 | 0.009 | 7.584 |
| C51 - H53 | 1.079 | 1.87 | -22.92 | 0.008 | 7.573 |

|           |       |      |        |       |       |
|-----------|-------|------|--------|-------|-------|
| C51 - H54 | 1.078 | 1.88 | -23.00 | 0.011 | 7.534 |
| C55 - H56 | 1.080 | 1.87 | -22.80 | 0.011 | 7.516 |
| C55 - H57 | 1.080 | 1.87 | -22.82 | 0.011 | 7.485 |
| C55 - H58 | 1.076 | 1.90 | -23.65 | 0.010 | 8.083 |
| C6 - C14  | 1.411 | 2.09 | -21.43 | 0.253 | 4.199 |
| C6 - C7   | 1.412 | 2.09 | -21.41 | 0.253 | 4.200 |
| C7 - C8   | 1.397 | 2.14 | -22.53 | 0.199 | 4.230 |
| C8 - C10  | 1.387 | 2.18 | -23.47 | 0.198 | 4.279 |
| C8 - H9   | 1.069 | 1.94 | -24.64 | 0.019 | 8.460 |
| C11 - C6  | 3.199 | 0.07 | 0.81   | 0.453 | 0.824 |
| C11 - H26 | 2.891 | 0.05 | 0.53   | 0.046 | 0.766 |
| C11 - H58 | 2.924 | 0.05 | 0.50   | 0.040 | 0.763 |
| C11 - P2  | 2.147 | 0.73 | -2.70  | 0.182 | 2.595 |
| H17 - H29 | 2.293 | 0.06 | 0.68   | 0.276 | 0.825 |
| H17 - H32 | 2.720 | 0.03 | 0.44   | 3.848 | 0.767 |
| H32 - H37 | 2.311 | 0.04 | 0.44   | 0.066 | 0.817 |
| H36 - H54 | 2.193 | 0.05 | 0.53   | 0.066 | 0.822 |
| H5 - H39  | 2.188 | 0.06 | 0.69   | 0.146 | 0.838 |
| H5 - H46  | 2.437 | 0.03 | 0.37   | 0.156 | 0.820 |
| N3 - C15  | 1.514 | 1.60 | -12.64 | 0.072 | 3.319 |
| N3 - C23  | 1.365 | 2.16 | -23.51 | 0.126 | 3.074 |
| N3 - C6   | 1.451 | 1.81 | -17.62 | 0.004 | 3.399 |
| P2 - C23  | 1.733 | 1.17 | 4.72   | 0.714 | 1.757 |

**Table S11.** Electron density topological descriptors for different bonding interactions in (BICAAC)PBr (**2**)

| Atoms     | $R_{ij}(\text{\AA})$ | $\rho(\text{e}\text{\AA}^{-3})$ | $\nabla^2\rho(\text{e}\text{\AA}^{-5})$ | $\epsilon$ | $ V /G$ |
|-----------|----------------------|---------------------------------|-----------------------------------------|------------|---------|
| Br1 - C8  | 3.347                | 0.07                            | 0.70                                    | 0.547      | 0.853   |
| Br1 - H53 | 3.018                | 0.05                            | 0.47                                    | 0.031      | 0.806   |
| Br1 - H58 | 2.975                | 0.05                            | 0.51                                    | 0.033      | 0.813   |
| Br1 - P2  | 2.315                | 0.64                            | -1.51                                   | 0.119      | 2.509   |
| C10 - C12 | 1.387                | 2.18                            | -23.48                                  | 0.197      | 4.281   |
| C10 - H11 | 1.069                | 1.94                            | -24.66                                  | 0.019      | 8.467   |
| C12 - C14 | 1.387                | 2.18                            | -23.49                                  | 0.198      | 4.280   |
| C12 - H13 | 1.069                | 1.94                            | -24.80                                  | 0.016      | 8.762   |
| C14 - C16 | 1.397                | 2.14                            | -22.52                                  | 0.199      | 4.231   |
| C14 - H15 | 1.069                | 1.94                            | -24.66                                  | 0.019      | 8.469   |
| C16 - C36 | 1.527                | 1.69                            | -15.48                                  | 0.020      | 4.701   |
| C17 - C18 | 1.544                | 1.66                            | -14.78                                  | 0.024      | 4.672   |
| C17 - C27 | 1.541                | 1.67                            | -15.00                                  | 0.023      | 4.696   |

|           |       |      |        |       |       |
|-----------|-------|------|--------|-------|-------|
| C18 - C21 | 1.539 | 1.64 | -14.51 | 0.001 | 4.656 |
| C18 - H19 | 1.080 | 1.89 | -23.21 | 0.008 | 7.582 |
| C18 - H20 | 1.076 | 1.91 | -23.75 | 0.007 | 7.790 |
| C21 - C24 | 1.555 | 1.60 | -13.63 | 0.009 | 4.480 |
| C21 - H22 | 1.079 | 1.90 | -23.58 | 0.009 | 7.846 |
| C21 - H23 | 1.080 | 1.89 | -23.25 | 0.009 | 7.649 |
| C24 - C25 | 1.566 | 1.57 | -13.16 | 0.009 | 4.472 |
| C24 - C42 | 1.550 | 1.61 | -13.81 | 0.034 | 4.406 |
| C24 - C43 | 1.536 | 1.65 | -14.75 | 0.004 | 4.655 |
| C25 - C27 | 1.549 | 1.62 | -14.12 | 0.007 | 4.632 |
| C25 - C47 | 1.532 | 1.66 | -14.86 | 0.009 | 4.671 |
| C25 - H26 | 1.083 | 1.90 | -23.33 | 0.004 | 7.586 |
| C27 - H28 | 1.080 | 1.89 | -23.17 | 0.007 | 7.579 |
| C27 - H29 | 1.078 | 1.90 | -23.56 | 0.008 | 7.710 |
| C30 - C32 | 1.541 | 1.63 | -14.26 | 0.015 | 4.614 |
| C30 - C51 | 1.541 | 1.62 | -14.23 | 0.013 | 4.607 |
| C30 - H31 | 1.076 | 1.93 | -24.20 | 0.005 | 7.835 |
| C32 - H33 | 1.080 | 1.87 | -22.86 | 0.009 | 7.582 |
| C32 - H34 | 1.079 | 1.88 | -22.92 | 0.008 | 7.582 |
| C32 - H35 | 1.079 | 1.88 | -22.99 | 0.011 | 7.536 |
| C36 - C38 | 1.541 | 1.63 | -14.26 | 0.015 | 4.614 |
| C36 - C55 | 1.541 | 1.62 | -14.21 | 0.013 | 4.602 |
| C36 - H37 | 1.075 | 1.94 | -24.25 | 0.005 | 7.826 |
| C38 - H39 | 1.080 | 1.87 | -22.87 | 0.009 | 7.585 |
| C38 - H40 | 1.078 | 1.88 | -23.00 | 0.011 | 7.531 |
| C38 - H41 | 1.080 | 1.87 | -22.91 | 0.009 | 7.575 |
| C4 - C17  | 1.526 | 1.70 | -15.65 | 0.014 | 4.757 |
| C4 - H5   | 1.079 | 1.88 | -22.93 | 0.008 | 7.546 |
| C4 - H6   | 1.075 | 1.90 | -23.47 | 0.010 | 7.789 |
| C4 - H7   | 1.075 | 1.90 | -23.50 | 0.010 | 7.778 |
| C43 - H44 | 1.075 | 1.90 | -23.52 | 0.011 | 7.827 |
| C43 - H45 | 1.077 | 1.89 | -23.29 | 0.011 | 7.788 |
| C43 - H46 | 1.081 | 1.87 | -22.70 | 0.010 | 7.437 |
| C47 - H48 | 1.080 | 1.87 | -22.78 | 0.009 | 7.488 |
| C47 - H49 | 1.079 | 1.88 | -23.05 | 0.009 | 7.709 |
| C47 - H50 | 1.077 | 1.89 | -23.19 | 0.011 | 7.658 |
| C51 - H52 | 1.080 | 1.87 | -22.80 | 0.011 | 7.511 |
| C51 - H53 | 1.075 | 1.90 | -23.68 | 0.010 | 8.086 |
| C51 - H54 | 1.080 | 1.87 | -22.81 | 0.011 | 7.484 |
| C55 - H56 | 1.080 | 1.87 | -22.79 | 0.011 | 7.506 |
| C55 - H57 | 1.080 | 1.87 | -22.81 | 0.011 | 7.484 |



|           |       |      |        |       |       |
|-----------|-------|------|--------|-------|-------|
| C55 - H58 | 1.075 | 1.90 | -23.69 | 0.010 | 8.088 |
| C8 - C16  | 1.412 | 2.09 | -21.37 | 0.253 | 4.197 |
| C8 - C9   | 1.412 | 2.09 | -21.37 | 0.253 | 4.197 |
| C9 - C10  | 1.397 | 2.14 | -22.53 | 0.199 | 4.230 |
| C9 - C30  | 1.527 | 1.69 | -15.47 | 0.020 | 4.703 |
| H20 - H31 | 2.285 | 0.06 | 0.69   | 0.279 | 0.826 |
| H20 - H35 | 2.708 | 0.04 | 0.45   | 3.109 | 0.771 |
| H29 - H37 | 2.169 | 0.07 | 0.70   | 0.136 | 0.839 |
| H37 - H49 | 2.467 | 0.03 | 0.35   | 0.196 | 0.813 |
| H6 - H35  | 2.275 | 0.05 | 0.47   | 0.059 | 0.819 |
| H7 - H40  | 2.169 | 0.05 | 0.56   | 0.066 | 0.822 |
| N3 - C17  | 1.514 | 1.60 | -12.57 | 0.072 | 3.315 |
| N3 - C42  | 1.366 | 2.16 | -23.55 | 0.128 | 3.079 |
| N3 - C8   | 1.451 | 1.82 | -17.68 | 0.003 | 3.396 |
| P2 - C42  | 1.736 | 1.16 | 4.65   | 0.690 | 1.757 |

**Table S12.** Electron density topological descriptors for different bonding interactions in (BICAAC)PI (**3**)

| Atoms     | $R_{ij}(\text{\AA})$ | $\rho(\text{e}\text{\AA}^{-3})$ | $\nabla^2\rho(\text{e}\text{\AA}^{-5})$ | $\epsilon$ | $ V /G$ |
|-----------|----------------------|---------------------------------|-----------------------------------------|------------|---------|
| C10 - H11 | 0.942                | 2.50                            | -38.94                                  | 0.018      | 6.377   |
| C10 - H12 | 0.943                | 2.48                            | -38.48                                  | 0.019      | 6.253   |
| C10 - H13 | 0.943                | 2.49                            | -38.79                                  | 0.017      | 6.408   |
| C14 - C19 | 1.368                | 2.26                            | -25.06                                  | 0.184      | 4.293   |
| C14 - H15 | 0.911                | 2.70                            | -46.49                                  | 0.011      | 6.719   |
| C16 - C38 | 1.532                | 1.63                            | -14.21                                  | 0.019      | 4.484   |
| C16 - C47 | 1.544                | 1.60                            | -13.57                                  | 0.016      | 4.447   |
| C16 - H17 | 0.964                | 2.45                            | -37.59                                  | 0.005      | 7.088   |
| C18 - C33 | 1.538                | 1.66                            | -14.52                                  | 0.032      | 4.419   |
| C19 - C21 | 1.369                | 2.25                            | -24.98                                  | 0.184      | 4.291   |
| C19 - H20 | 0.911                | 2.71                            | -46.84                                  | 0.004      | 6.934   |
| C21 - H22 | 0.911                | 2.71                            | -46.61                                  | 0.011      | 6.723   |
| C23 - C42 | 1.539                | 1.64                            | -14.26                                  | 0.013      | 4.540   |
| C23 - H24 | 0.953                | 2.46                            | -38.07                                  | 0.012      | 6.590   |
| C23 - H25 | 0.954                | 2.45                            | -37.72                                  | 0.012      | 6.515   |
| C26 - C44 | 1.545                | 1.60                            | -13.69                                  | 0.008      | 4.491   |
| C26 - H27 | 0.954                | 2.45                            | -37.74                                  | 0.015      | 6.525   |
| C26 - H28 | 0.953                | 2.46                            | -38.09                                  | 0.014      | 6.610   |
| C29 - H30 | 0.943                | 2.48                            | -38.52                                  | 0.016      | 6.224   |
| C29 - H31 | 0.942                | 2.48                            | -38.65                                  | 0.017      | 6.203   |
| C29 - H32 | 0.943                | 2.48                            | -38.62                                  | 0.017      | 6.200   |

|           |       |      |        |       |       |
|-----------|-------|------|--------|-------|-------|
| C33 - C42 | 1.528 | 1.69 | -15.17 | 0.015 | 4.545 |
| C33 - C44 | 1.535 | 1.66 | -14.55 | 0.008 | 4.497 |
| C33 - C51 | 1.562 | 1.56 | -12.98 | 0.008 | 4.452 |
| C34 - H35 | 0.942 | 2.51 | -39.32 | 0.018 | 6.595 |
| C34 - H36 | 0.943 | 2.48 | -38.46 | 0.020 | 6.152 |
| C34 - H37 | 0.942 | 2.48 | -38.68 | 0.020 | 6.197 |
| C38 - H39 | 0.943 | 2.48 | -38.68 | 0.018 | 6.194 |
| C38 - H40 | 0.943 | 2.48 | -38.62 | 0.017 | 6.220 |
| C38 - H41 | 0.944 | 2.48 | -38.44 | 0.016 | 6.236 |
| C4 - C14  | 1.393 | 2.16 | -22.84 | 0.189 | 4.236 |
| C4 - C5   | 1.398 | 2.15 | -22.60 | 0.248 | 4.222 |
| C4 - C8   | 1.510 | 1.74 | -16.36 | 0.018 | 4.675 |
| C42 - C55 | 1.472 | 1.85 | -18.02 | 0.015 | 4.615 |
| C42 - H43 | 0.963 | 2.43 | -37.12 | 0.006 | 6.652 |
| C44 - H45 | 0.953 | 2.47 | -38.46 | 0.014 | 6.820 |
| C44 - H46 | 0.953 | 2.46 | -37.97 | 0.014 | 6.629 |
| C47 - H48 | 0.944 | 2.48 | -38.45 | 0.020 | 6.194 |
| C47 - H49 | 0.943 | 2.48 | -38.44 | 0.021 | 6.188 |
| C47 - H50 | 0.942 | 2.51 | -39.32 | 0.018 | 6.611 |
| C5 - C6   | 1.395 | 2.16 | -22.86 | 0.249 | 4.219 |
| C51 - H52 | 0.942 | 2.50 | -39.15 | 0.019 | 6.473 |
| C51 - H53 | 0.943 | 2.47 | -38.35 | 0.023 | 6.179 |
| C51 - H54 | 0.943 | 2.49 | -38.83 | 0.020 | 6.467 |
| C55 - H56 | 0.943 | 2.47 | -38.28 | 0.014 | 6.057 |
| C55 - H57 | 0.944 | 2.48 | -38.41 | 0.014 | 6.194 |
| C55 - H58 | 0.943 | 2.49 | -38.68 | 0.012 | 6.249 |
| C6 - C16  | 1.503 | 1.77 | -16.78 | 0.015 | 4.688 |
| C6 - C21  | 1.392 | 2.16 | -22.91 | 0.188 | 4.244 |
| C7 - C10  | 1.526 | 1.68 | -15.17 | 0.016 | 4.597 |
| C7 - C23  | 1.522 | 1.73 | -15.89 | 0.023 | 4.670 |
| C7 - C26  | 1.521 | 1.73 | -15.98 | 0.024 | 4.687 |
| C8 - C29  | 1.531 | 1.64 | -14.33 | 0.018 | 4.492 |
| C8 - C34  | 1.533 | 1.63 | -14.13 | 0.014 | 4.466 |
| C8 - H9   | 0.962 | 2.45 | -37.78 | 0.006 | 7.064 |
| H11 - H32 | 2.355 | 0.04 | 0.43   | 0.195 | 0.787 |
| H13 - H39 | 2.486 | 0.03 | 0.34   | 0.227 | 0.768 |
| H17 - H24 | 2.220 | 0.06 | 0.68   | 0.201 | 0.821 |
| H17 - H58 | 2.415 | 0.03 | 0.40   | 0.117 | 0.804 |
| H9 - H28  | 2.183 | 0.06 | 0.74   | 0.197 | 0.818 |
| I1 - H50  | 2.973 | 0.04 | 0.40   | 0.040 | 0.806 |
| I1 - P2   | 2.212 | 0.55 | -0.72  | 0.092 | 2.312 |

|          |       |      |        |       |       |
|----------|-------|------|--------|-------|-------|
| N3 - C18 | 1.362 | 2.18 | -23.74 | 0.122 | 3.061 |
| N3 - C5  | 1.453 | 1.81 | -17.51 | 0.009 | 3.383 |
| N3 - C7  | 1.509 | 1.61 | -12.91 | 0.070 | 3.293 |
| P2 - C18 | 1.723 | 1.18 | 5.54   | 0.626 | 1.726 |

**Table S13.** Electron density topological descriptors for different bonding interactions in (BICAAC)<sub>2</sub>P<sub>2</sub> (**4**)

| Atoms       | R <sub>ij</sub> (Å) | ρ(eÅ <sup>-3</sup> ) | ∇ <sup>2</sup> ρ(eÅ <sup>-5</sup> ) | ε     | V /G  |
|-------------|---------------------|----------------------|-------------------------------------|-------|-------|
| C10 - C30   | 1.541               | 1.63                 | -14.28                              | 0.015 | 4.620 |
| C10 - C38   | 1.540               | 1.63                 | -14.25                              | 0.014 | 4.598 |
| C10 - H11   | 1.074               | 1.94                 | -24.40                              | 0.005 | 7.859 |
| C101 - H102 | 1.080               | 1.87                 | -22.88                              | 0.008 | 7.539 |
| C101 - H103 | 1.080               | 1.87                 | -22.82                              | 0.009 | 7.562 |
| C101 - H104 | 1.078               | 1.88                 | -23.08                              | 0.011 | 7.548 |
| C106 - C111 | 1.538               | 1.64                 | -14.43                              | 0.007 | 4.617 |
| C106 - H107 | 1.080               | 1.91                 | -23.60                              | 0.004 | 7.522 |
| C108 - H109 | 1.073               | 1.92                 | -23.96                              | 0.009 | 8.054 |
| C108 - H110 | 1.080               | 1.87                 | -22.73                              | 0.011 | 7.363 |
| C111 - H112 | 1.080               | 1.87                 | -22.76                              | 0.008 | 7.461 |
| C111 - H113 | 1.078               | 1.88                 | -23.09                              | 0.010 | 7.574 |
| C111 - H114 | 1.079               | 1.88                 | -23.03                              | 0.009 | 7.586 |
| C115 - H116 | 1.079               | 1.88                 | -23.02                              | 0.012 | 7.508 |
| C115 - H117 | 1.074               | 1.92                 | -23.88                              | 0.009 | 7.997 |
| C115 - H118 | 1.079               | 1.87                 | -22.89                              | 0.013 | 7.441 |
| C12 - C21   | 1.531               | 1.70                 | -15.63                              | 0.021 | 4.766 |
| C12 - C47   | 1.518               | 1.72                 | -15.80                              | 0.014 | 4.664 |
| C12 - H13   | 1.081               | 1.88                 | -23.05                              | 0.006 | 7.548 |
| C12 - H14   | 1.082               | 1.88                 | -22.98                              | 0.004 | 7.484 |
| C15 - H16   | 1.069               | 1.93                 | -24.60                              | 0.019 | 8.414 |
| C17 - C21   | 1.535               | 1.67                 | -15.13                              | 0.017 | 4.741 |
| C17 - H18   | 1.079               | 1.87                 | -22.87                              | 0.008 | 7.499 |
| C17 - H19   | 1.075               | 1.90                 | -23.41                              | 0.010 | 7.709 |
| C17 - H20   | 1.075               | 1.90                 | -23.59                              | 0.009 | 7.809 |
| C2 - C4     | 1.398               | 2.14                 | -22.47                              | 0.198 | 4.234 |
| C2 - C7     | 1.385               | 2.19                 | -23.60                              | 0.200 | 4.276 |
| C2 - H3     | 1.069               | 1.94                 | -24.63                              | 0.019 | 8.397 |
| C21 - C34   | 1.548               | 1.63                 | -14.42                              | 0.032 | 4.712 |
| C22 - C26   | 1.541               | 1.63                 | -14.23                              | 0.012 | 4.602 |
| C22 - C42   | 1.543               | 1.62                 | -14.15                              | 0.016 | 4.602 |
| C22 - H23   | 1.075               | 1.94                 | -24.39                              | 0.005 | 7.969 |

|           |       |      |        |       |       |
|-----------|-------|------|--------|-------|-------|
| C24 - C47 | 1.564 | 1.59 | -13.52 | 0.015 | 4.592 |
| C24 - C49 | 1.548 | 1.62 | -14.14 | 0.008 | 4.623 |
| C24 - C56 | 1.554 | 1.59 | -13.65 | 0.009 | 4.554 |
| C26 - H27 | 1.075 | 1.91 | -23.72 | 0.009 | 8.065 |
| C26 - H28 | 1.080 | 1.87 | -22.75 | 0.010 | 7.454 |
| C26 - H29 | 1.080 | 1.87 | -22.76 | 0.011 | 7.422 |
| C30 - H31 | 1.079 | 1.87 | -22.90 | 0.009 | 7.533 |
| C30 - H32 | 1.078 | 1.88 | -23.02 | 0.010 | 7.565 |
| C30 - H33 | 1.080 | 1.87 | -22.83 | 0.009 | 7.549 |
| C34 - H35 | 1.073 | 1.91 | -23.71 | 0.010 | 7.681 |
| C34 - H36 | 1.076 | 1.89 | -23.32 | 0.010 | 7.663 |
| C34 - H37 | 1.080 | 1.87 | -22.72 | 0.009 | 7.439 |
| C38 - H39 | 1.080 | 1.87 | -22.76 | 0.010 | 7.493 |
| C38 - H40 | 1.075 | 1.90 | -23.66 | 0.009 | 8.037 |
| C38 - H41 | 1.080 | 1.87 | -22.77 | 0.010 | 7.478 |
| C4 - C22  | 1.527 | 1.69 | -15.48 | 0.020 | 4.708 |
| C4 - C5   | 1.416 | 2.07 | -21.05 | 0.251 | 4.193 |
| C42 - H43 | 1.080 | 1.87 | -22.88 | 0.008 | 7.539 |
| C42 - H44 | 1.080 | 1.87 | -22.82 | 0.009 | 7.562 |
| C42 - H45 | 1.078 | 1.88 | -23.08 | 0.011 | 7.548 |
| C47 - C52 | 1.538 | 1.64 | -14.43 | 0.007 | 4.617 |
| C47 - H48 | 1.080 | 1.91 | -23.60 | 0.004 | 7.522 |
| C49 - H50 | 1.073 | 1.92 | -23.96 | 0.009 | 8.054 |
| C49 - H51 | 1.080 | 1.87 | -22.73 | 0.011 | 7.363 |
| C5 - C6   | 1.416 | 2.07 | -21.04 | 0.251 | 4.198 |
| C5 - P105 | 3.230 | 0.08 | 0.78   | 1.040 | 0.880 |
| C52 - H53 | 1.080 | 1.87 | -22.76 | 0.008 | 7.461 |
| C52 - H54 | 1.078 | 1.88 | -23.09 | 0.010 | 7.574 |
| C52 - H55 | 1.079 | 1.88 | -23.03 | 0.009 | 7.586 |
| C56 - H57 | 1.079 | 1.88 | -23.02 | 0.012 | 7.508 |
| C56 - H58 | 1.074 | 1.92 | -23.88 | 0.009 | 7.997 |
| C56 - H59 | 1.079 | 1.87 | -22.89 | 0.013 | 7.441 |
| C6 - C10  | 1.526 | 1.69 | -15.51 | 0.019 | 4.706 |
| C6 - C15  | 1.396 | 2.14 | -22.58 | 0.199 | 4.233 |
| C61 - C63 | 1.398 | 2.14 | -22.47 | 0.198 | 4.234 |
| C61 - C66 | 1.385 | 2.19 | -23.60 | 0.200 | 4.276 |
| C61 - H62 | 1.069 | 1.94 | -24.63 | 0.019 | 8.397 |
| C63 - C64 | 1.416 | 2.07 | -21.04 | 0.251 | 4.193 |
| C63 - C81 | 1.527 | 1.69 | -15.48 | 0.020 | 4.708 |
| C64 - C65 | 1.416 | 2.07 | -21.04 | 0.251 | 4.198 |
| C65 - C69 | 1.526 | 1.69 | -15.51 | 0.019 | 4.706 |

|            |       |      |        |       |       |
|------------|-------|------|--------|-------|-------|
| C65 - C74  | 1.396 | 2.14 | -22.58 | 0.199 | 4.233 |
| C66 - C74  | 1.386 | 2.18 | -23.57 | 0.198 | 4.283 |
| C66 - H67  | 1.070 | 1.93 | -24.69 | 0.017 | 8.666 |
| C68 - C83  | 1.600 | 1.47 | -11.50 | 0.034 | 4.364 |
| C68 - P105 | 1.757 | 1.11 | 4.06   | 0.490 | 1.771 |
| C69 - C89  | 1.541 | 1.63 | -14.28 | 0.015 | 4.620 |
| C69 - C97  | 1.540 | 1.63 | -14.25 | 0.014 | 4.598 |
| C69 - H70  | 1.074 | 1.94 | -24.40 | 0.005 | 7.859 |
| C7 - C15   | 1.386 | 2.18 | -23.57 | 0.198 | 4.283 |
| C7 - H109  | 3.304 | 0.02 | 0.26   | 0.524 | 0.739 |
| C7 - H8    | 1.070 | 1.93 | -24.69 | 0.017 | 8.666 |
| C71 - C106 | 1.518 | 1.72 | -15.80 | 0.014 | 4.664 |
| C71 - C80  | 1.531 | 1.70 | -15.63 | 0.021 | 4.766 |
| C71 - H72  | 1.081 | 1.88 | -23.05 | 0.006 | 7.548 |
| C71 - H73  | 1.082 | 1.88 | -22.98 | 0.004 | 7.484 |
| C74 - H75  | 1.069 | 1.93 | -24.60 | 0.019 | 8.414 |
| C76 - C80  | 1.535 | 1.67 | -15.13 | 0.017 | 4.741 |
| C76 - H77  | 1.079 | 1.87 | -22.87 | 0.008 | 7.499 |
| C76 - H78  | 1.075 | 1.90 | -23.41 | 0.010 | 7.709 |
| C76 - H79  | 1.075 | 1.90 | -23.59 | 0.009 | 7.809 |
| C80 - C93  | 1.548 | 1.63 | -14.42 | 0.032 | 4.712 |
| C81 - C101 | 1.543 | 1.62 | -14.15 | 0.016 | 4.602 |
| C81 - C85  | 1.541 | 1.63 | -14.23 | 0.012 | 4.602 |
| C81 - H82  | 1.075 | 1.94 | -24.39 | 0.005 | 7.969 |
| C83 - C106 | 1.564 | 1.59 | -13.52 | 0.015 | 4.592 |
| C83 - C108 | 1.548 | 1.62 | -14.14 | 0.008 | 4.623 |
| C83 - C115 | 1.554 | 1.59 | -13.65 | 0.009 | 4.553 |
| C85 - H86  | 1.075 | 1.91 | -23.72 | 0.009 | 8.065 |
| C85 - H87  | 1.080 | 1.87 | -22.75 | 0.010 | 7.454 |
| C85 - H88  | 1.080 | 1.87 | -22.76 | 0.011 | 7.422 |
| C89 - H90  | 1.079 | 1.87 | -22.90 | 0.009 | 7.533 |
| C89 - H91  | 1.078 | 1.88 | -23.02 | 0.010 | 7.565 |
| C89 - H92  | 1.080 | 1.87 | -22.83 | 0.009 | 7.549 |
| C9 - C24   | 1.600 | 1.47 | -11.50 | 0.034 | 4.364 |
| C9 - P46   | 1.757 | 1.11 | 4.06   | 0.490 | 1.771 |
| C93 - H94  | 1.073 | 1.91 | -23.71 | 0.010 | 7.681 |
| C93 - H95  | 1.076 | 1.89 | -23.32 | 0.010 | 7.663 |
| C93 - H96  | 1.080 | 1.87 | -22.72 | 0.009 | 7.440 |
| C97 - H100 | 1.080 | 1.87 | -22.77 | 0.010 | 7.478 |
| C97 - H98  | 1.080 | 1.87 | -22.76 | 0.010 | 7.493 |
| C97 - H99  | 1.075 | 1.90 | -23.66 | 0.009 | 8.037 |

|             |       |      |        |       |       |
|-------------|-------|------|--------|-------|-------|
| H11 - H13   | 2.340 | 0.05 | 0.49   | 0.385 | 0.837 |
| H11 - H59   | 2.223 | 0.05 | 0.54   | 0.039 | 0.840 |
| H19 - H32   | 2.174 | 0.05 | 0.56   | 0.092 | 0.820 |
| H20 - H45   | 2.385 | 0.04 | 0.42   | 0.049 | 0.802 |
| H23 - H35   | 2.350 | 0.08 | 0.91   | 0.735 | 0.829 |
| H25 - C49   | 1.079 | 1.88 | -22.97 | 0.012 | 7.562 |
| H27 - H86   | 2.852 | 0.02 | 0.30   | 0.408 | 0.693 |
| H27 - P105  | 2.852 | 0.07 | 0.54   | 0.018 | 0.871 |
| H35 - H45   | 2.271 | 0.07 | 0.79   | 0.426 | 0.807 |
| H40 - H99   | 2.573 | 0.02 | 0.24   | 0.291 | 0.774 |
| H40 - P105  | 3.132 | 0.04 | 0.37   | 0.412 | 0.804 |
| H50 - C66   | 3.305 | 0.02 | 0.26   | 0.524 | 0.739 |
| H70 - H118  | 2.223 | 0.05 | 0.54   | 0.039 | 0.840 |
| H70 - H72   | 2.340 | 0.05 | 0.49   | 0.384 | 0.836 |
| H78 - H91   | 2.174 | 0.05 | 0.56   | 0.092 | 0.820 |
| H79 - H104  | 2.385 | 0.04 | 0.42   | 0.050 | 0.801 |
| H82 - H94   | 2.349 | 0.08 | 0.91   | 0.735 | 0.829 |
| H84 - C108  | 1.079 | 1.88 | -22.97 | 0.012 | 7.562 |
| H94 - H104  | 2.272 | 0.07 | 0.79   | 0.427 | 0.807 |
| N1 - C21    | 1.517 | 1.59 | -12.43 | 0.060 | 3.351 |
| N1 - C5     | 1.453 | 1.83 | -17.64 | 0.031 | 3.484 |
| N1 - C9     | 1.387 | 2.06 | -21.86 | 0.144 | 3.160 |
| N60 - C64   | 1.453 | 1.83 | -17.64 | 0.031 | 3.484 |
| N60 - C68   | 1.387 | 2.06 | -21.86 | 0.144 | 3.159 |
| N60 - C80   | 1.517 | 1.59 | -12.43 | 0.060 | 3.351 |
| P105 - H109 | 2.833 | 0.11 | 1.21   | 1.509 | 0.908 |
| P46 - C64   | 3.230 | 0.08 | 0.78   | 1.040 | 0.880 |
| P46 - H50   | 2.832 | 0.11 | 1.21   | 1.509 | 0.908 |
| P46 - H86   | 2.853 | 0.07 | 0.54   | 0.018 | 0.871 |
| P46 - H99   | 3.132 | 0.04 | 0.37   | 0.411 | 0.804 |
| P46 - P105  | 2.228 | 0.77 | -3.32  | 0.187 | 3.395 |

4. **Hyperconjugative Interactions using second-order perturbation energetics:** The hyperconjugative interactions in complexes **1-4** were studied using second-order perturbation theory. The NBO analyses were performed on the optimized geometry of **1,2,4** and crystal geometry of **3** at B3LYP/def2-TZVP level using *Gaussian09*.<sup>58</sup> The hyperconjugative stabilization interaction energies (kcal/mol) for selected hyperconjugative interactions involving P atom are mentioned.

**Table S14.** Selected second-order perturbation analysis of the hyperconjugative interactions in **1-4**

| Compound | Donor orbital | Acceptor orbital     | Energy (kcal/mol) |
|----------|---------------|----------------------|-------------------|
| <b>1</b> | LP (1) P      | BD*(1)Cl 1 - P 2     | 1.33              |
|          | LP (1) P      | BD*(1) N 3 - C 23    | 17.2              |
|          | LP (1) P      | BD*(1) C 22 - C 47   | 0.57              |
|          | LP (1) P      | BD*(1) C 47 - H 49   | 1.21              |
| <b>2</b> | LP (1) P      | BD*(1)Br 1 - P 2     | 1.17              |
|          | LP (1) P      | BD*(1) N 3 - C 42    | 17.62             |
|          | LP (1) P      | BD*(1) C 24 - C 42   | 0.52              |
|          | LP (1) P      | BD*(1) C 24 - C 43   | 0.56              |
|          | LP (1) P      | BD*(1) C 43 - H 46   | 1.2               |
| <b>3</b> | LP (1) P      | BD*(1) I 1 - P 2     | 0.85              |
|          | LP (1) P      | BD*(1) N 3 - C 18    | 18.8              |
|          | LP (1) P      | BD*(1) C 18 - C 33   | 0.56              |
|          | LP (1) P      | BD*(1) C 51 - H 53   | 0.92              |
| <b>4</b> | LP (1) P      | BD*(2) C 9 - P 46    | 0.9               |
|          | LP (1) P      | BD*(1) N 60 - C 68   | 18.91             |
|          | LP (1) P      | BD*(1) C 108 - H 109 | 0.5               |
|          | LP (1) P      | BD*(1) C 108 - H 110 | 0.57              |

## DFT Calculations

The DFT calculations were carried out using Gaussian 16: ES64L-G16RevA.03.<sup>13</sup> Input coordinates of compound **1** was obtained from the experimental X-ray crystal structure. The optimization of all the stationary points in the gas phase was done using the M06-2X<sup>14</sup> density functional with def2svp3 basis set for all atoms. The vibrational frequencies of the normal modes were calculated to confirm the nature of the stationary points. All intermediates were at minima with no imaginary frequencies. The single point energy correction was done with def2-TZVP<sup>15</sup> for all atoms.

## Coordinates of Stationary Points

Compound **1**

|                                              |                             |
|----------------------------------------------|-----------------------------|
| Single Point Energy=                         | -1714.464091                |
| Zero-point correction=                       | 0.511261 (Hartree/Particle) |
| Thermal correction to Energy=                | 0.537301                    |
| Thermal correction to Enthalpy=              | 0.538245                    |
| Thermal correction to Gibbs Free Energy=     | 0.458391                    |
| Sum of electronic and zero-point Energies=   | -1712.682146                |
| Sum of electronic and thermal Energies=      | -1712.656106                |
| Sum of electronic and thermal Enthalpies=    | -1712.655162                |
| Sum of electronic and thermal Free Energies= | -1712.735017                |

**Table S15:** Coordinates of optimized structure of **1**

|    |             |             |             |
|----|-------------|-------------|-------------|
| Cl | -1.29122400 | -0.14753300 | 2.64299800  |
| P  | 0.74377600  | -0.62437800 | 2.32111000  |
| N  | 0.39012400  | 0.00393100  | -0.43787500 |
| C  | -0.72554400 | 2.67480900  | -0.19634400 |
| H  | 0.28033200  | 2.40012200  | -0.53728800 |
| C  | -1.04068600 | 0.14624700  | -0.40359100 |
| C  | -1.59677800 | 1.43672200  | -0.31978500 |
| C  | -2.98682300 | 1.55790000  | -0.27530400 |
| H  | -3.43724600 | 2.54869100  | -0.19482400 |
| C  | -3.80576200 | 0.43394000  | -0.31762200 |
| H  | -4.89042300 | 0.54626900  | -0.27998400 |
| C  | -3.23907800 | -0.83184700 | -0.39716200 |
| H  | -3.88552400 | -1.71183000 | -0.41479100 |
| C  | -1.85179100 | -1.00253700 | -0.43468000 |
| C  | 1.12176400  | 0.05397300  | -1.74055500 |
| C  | 1.71108800  | -1.34313800 | -1.99644100 |
| H  | 0.89580700  | -2.05693400 | -2.17483900 |
| H  | 2.30939400  | -1.30295300 | -2.91864700 |
| C  | 2.56781300  | -1.74786700 | -0.78588400 |



|   |             |             |             |
|---|-------------|-------------|-------------|
| H | 3.61163900  | -1.93640300 | -1.08069400 |
| H | 2.19364700  | -2.67372600 | -0.32338600 |
| C | 2.57457900  | -0.63997400 | 0.29623700  |
| C | 1.10692200  | -0.36921500 | 0.65577400  |
| C | -1.21278600 | 3.83529200  | -1.06632200 |
| H | -1.35657300 | 3.52812800  | -2.11306000 |
| H | -0.48219100 | 4.65715200  | -1.04481900 |
| H | -2.16793100 | 4.24100200  | -0.70101800 |
| C | -1.28788400 | -2.41376200 | -0.46667800 |
| H | -0.19542200 | -2.34472900 | -0.38143400 |
| C | -1.62508700 | -3.11394300 | -1.78772100 |
| H | -2.71269300 | -3.24981000 | -1.88964500 |
| H | -1.15669700 | -4.10893300 | -1.83014800 |
| H | -1.28244600 | -2.53385900 | -2.65761600 |
| C | 0.21174700  | 0.48535900  | -2.87913600 |
| H | -0.62744600 | -0.21048200 | -3.01280800 |
| H | 0.80081300  | 0.50662400  | -3.80677900 |
| H | -0.20165200 | 1.48877900  | -2.70767000 |
| C | 2.30831800  | 1.01792200  | -1.59013300 |
| H | 1.94361400  | 2.05360800  | -1.53132400 |
| H | 2.91437100  | 0.95227300  | -2.50613500 |
| C | 3.14237100  | 0.66321900  | -0.34021800 |
| H | 4.17053900  | 0.41383400  | -0.65120100 |
| C | 3.20537900  | 1.83558800  | 0.63563500  |
| H | 2.20189300  | 2.07849100  | 1.01965900  |
| H | 3.60161400  | 2.72661300  | 0.12692700  |
| H | 3.85535000  | 1.62653200  | 1.49601200  |
| C | 3.46375900  | -1.10335200 | 1.44968100  |
| H | 3.13513100  | -2.07771200 | 1.83750000  |
| H | 3.47650100  | -0.39468500 | 2.28734400  |

|   |             |             |            |
|---|-------------|-------------|------------|
| H | 4.49291100  | -1.21298700 | 1.07537600 |
| C | -0.59974400 | 3.10399600  | 1.27039000 |
| H | -1.58745500 | 3.36194000  | 1.68318800 |
| H | 0.05268900  | 3.98641900  | 1.35712600 |
| H | -0.18549100 | 2.29513400  | 1.88803300 |
| C | -1.77546200 | -3.24234500 | 0.72705500 |
| H | -1.56393300 | -2.72875500 | 1.67442400 |
| H | -1.27738200 | -4.22323600 | 0.73652000 |
| H | -2.86034200 | -3.42030100 | 0.67032700 |

**Compound 1'**

|                                              |                             |
|----------------------------------------------|-----------------------------|
| Single Point Energy=                         | -1714.456947                |
| Zero-point correction=                       | 0.510976 (Hartree/Particle) |
| Thermal correction to Energy=                | 0.537208                    |
| Thermal correction to Enthalpy=              | 0.538152                    |
| Thermal correction to Gibbs Free Energy=     | 0.457489                    |
| Sum of electronic and zero-point Energies=   | -1712.673981                |
| Sum of electronic and thermal Energies=      | -1712.647749                |
| Sum of electronic and thermal Enthalpies=    | -1712.646805                |
| Sum of electronic and thermal Free Energies= | -1712.727468                |

**Table S16:** Coordinates of optimized structure of **1'**

|    |             |             |             |
|----|-------------|-------------|-------------|
| Cl | -2.47824300 | -0.65864100 | -3.01168000 |
| P  | -0.69100100 | -0.28667600 | -1.95411900 |
| N  | 0.00057100  | -0.06143400 | 0.56651800  |
| C  | 0.76020100  | 2.66064700  | -0.23950800 |
| H  | -0.22635800 | 2.27343100  | 0.04682800  |
| C  | 1.30739600  | 0.16360600  | 0.01892200  |
| C  | 1.70723000  | 1.47450500  | -0.31535700 |
| C  | 3.01434900  | 1.67197900  | -0.76958900 |

|   |             |             |             |
|---|-------------|-------------|-------------|
| H | 3.34563300  | 2.68242300  | -1.01859600 |
| C | 3.89260700  | 0.60408500  | -0.91818100 |
| H | 4.91126100  | 0.77873800  | -1.26795500 |
| C | 3.46229800  | -0.68975900 | -0.64460900 |
| H | 4.14498300  | -1.52890300 | -0.79459600 |
| C | 2.16465600  | -0.93728000 | -0.18793300 |
| C | -0.23593500 | -0.04215300 | 2.03228800  |
| C | -0.78402500 | -1.41985400 | 2.43668100  |
| H | 0.02234000  | -2.16533000 | 2.38572300  |
| H | -1.10732100 | -1.36762100 | 3.48733200  |
| C | -1.94923000 | -1.77984700 | 1.50480200  |
| H | -2.84860600 | -2.04956300 | 2.07831300  |
| H | -1.70397400 | -2.64618200 | 0.87187800  |
| C | -2.32279200 | -0.59753100 | 0.57136500  |
| C | -1.06783600 | -0.31615200 | -0.25760900 |
| C | 1.19882500  | 3.68866600  | 0.80835400  |
| H | 1.27109300  | 3.25168000  | 1.81443900  |
| H | 0.48021400  | 4.52076200  | 0.85093800  |
| H | 2.18414100  | 4.10979900  | 0.55599400  |
| C | 1.71748900  | -2.37274800 | 0.03561800  |
| H | 0.65250300  | -2.35096200 | 0.30555400  |
| C | 2.49319500  | -3.04282500 | 1.17456000  |
| H | 3.56443300  | -3.11170300 | 0.93070900  |
| H | 2.12212600  | -4.06485600 | 1.34305600  |
| H | 2.40284600  | -2.48707800 | 2.11911500  |
| C | 1.03016100  | 0.29212300  | 2.80307800  |
| H | 1.82398000  | -0.44202900 | 2.61311700  |
| H | 0.79803200  | 0.28577500  | 3.87726800  |
| H | 1.41766700  | 1.28312700  | 2.53473000  |
| C | -1.33580700 | 0.99621100  | 2.28781600  |

|   |             |             |             |
|---|-------------|-------------|-------------|
| H | -0.95055700 | 1.99072400  | 2.01519300  |
| H | -1.55915700 | 1.02364400  | 3.36516700  |
| C | -2.59671300 | 0.65243600  | 1.46493800  |
| H | -3.39529700 | 0.33657000  | 2.15714700  |
| C | -3.10283000 | 1.85378400  | 0.66911600  |
| H | -2.42562000 | 2.07718500  | -0.17183900 |
| H | -3.15594400 | 2.74394500  | 1.31299000  |
| H | -4.10470000 | 1.68131800  | 0.25484000  |
| C | -3.58928800 | -0.98426000 | -0.18276500 |
| H | -3.44621200 | -1.90974300 | -0.75477400 |
| H | -3.92059100 | -0.21230700 | -0.88291300 |
| H | -4.38576100 | -1.15154500 | 0.55926500  |
| C | 0.60650400  | 3.32842100  | -1.61074600 |
| H | 1.54728500  | 3.80213000  | -1.93093100 |
| H | -0.16343200 | 4.11312800  | -1.56561500 |
| H | 0.30961300  | 2.59374700  | -2.37152500 |
| C | 1.84132200  | -3.19118500 | -1.25447500 |
| H | 1.29247100  | -2.70874400 | -2.07474500 |
| H | 1.42932000  | -4.20023800 | -1.10543700 |
| H | 2.89406400  | -3.30145100 | -1.55656400 |

#### Compound 5

|                                            |                             |
|--------------------------------------------|-----------------------------|
| Single Point Energy=                       | -1286.877864                |
| Zero-point correction=                     | 0.288118 (Hartree/Particle) |
| Thermal correction to Energy=              | 0.303013                    |
| Thermal correction to Enthalpy=            | 0.303957                    |
| Thermal correction to Gibbs Free Energy=   | 0.247204                    |
| Sum of electronic and zero-point Energies= | -1285.782284                |
| Sum of electronic and thermal Energies=    | -1285.767389                |
| Sum of electronic and thermal Enthalpies=  | -1285.766444                |

Sum of electronic and thermal Free Energies= -1285.823197

**Table S17:** Coordinates of optimized structure of **5**

|   |             |             |             |
|---|-------------|-------------|-------------|
| P | -2.02717000 | -1.03197900 | -0.08782200 |
| N | -0.04963700 | 0.94783000  | 0.15044100  |
| C | 1.34694900  | 1.25031800  | -0.23922700 |
| C | 1.52545200  | 0.73959800  | -1.67924900 |
| H | 0.79384400  | 1.25765000  | -2.31591800 |
| H | 2.52902700  | 1.01674400  | -2.03282200 |
| C | 1.31457800  | -0.78002400 | -1.71812800 |
| H | 2.26409100  | -1.31599300 | -1.87707800 |
| H | 0.63558700  | -1.06515700 | -2.53390700 |
| C | 0.71511000  | -1.26219100 | -0.37847900 |
| C | -0.45922900 | -0.32973500 | -0.07662500 |
| C | 1.64041100  | 2.74385400  | -0.18976000 |
| H | 0.91608500  | 3.30457700  | -0.79793000 |
| H | 2.64336700  | 2.92044600  | -0.60241700 |
| H | 1.62918400  | 3.14556400  | 0.83138900  |
| C | 2.26724800  | 0.43888800  | 0.68427900  |
| H | 2.24523200  | 0.87943600  | 1.69413600  |
| H | 3.30439400  | 0.51975600  | 0.32287600  |
| C | 1.78657900  | -1.03258800 | 0.73125900  |
| H | 2.62959400  | -1.69488200 | 0.47497300  |
| C | 1.28792000  | -1.40629300 | 2.12496400  |
| H | 0.41710300  | -0.79283600 | 2.40584300  |
| H | 2.07875700  | -1.23355400 | 2.86931800  |
| H | 0.99261100  | -2.46223000 | 2.19104900  |
| C | 0.34723800  | -2.73908600 | -0.49424100 |
| H | -0.34249400 | -2.90916300 | -1.33297600 |
| H | -0.12888000 | -3.12562500 | 0.41705900  |

|    |             |             |             |
|----|-------------|-------------|-------------|
| H  | 1.26117100  | -3.32282400 | -0.68171400 |
| C  | -0.74336700 | 1.83088000  | 1.07303600  |
| H  | -1.28777100 | 2.64252200  | 0.56934700  |
| H  | -1.46575600 | 1.24803700  | 1.65360700  |
| H  | -0.01572300 | 2.26570600  | 1.77298500  |
| Cl | -3.32457400 | 0.63794000  | -0.10532600 |

#### Compound 6

|                                              |                             |
|----------------------------------------------|-----------------------------|
| Single Point Energy=                         | -1254.833554                |
| Zero-point correction=                       | 0.517944 (Hartree/Particle) |
| Thermal correction to Energy=                | 0.542853                    |
| Thermal correction to Enthalpy=              | 0.543798                    |
| Thermal correction to Gibbs Free Energy=     | 0.466374                    |
| Sum of electronic and zero-point Energies=   | -1253.201298                |
| Sum of electronic and thermal Energies=      | -1253.176389                |
| Sum of electronic and thermal Enthalpies=    | -1253.175445                |
| Sum of electronic and thermal Free Energies= | -1253.252868                |

**Table S18:** Coordinates of optimized structure of **6**

|   |             |             |             |
|---|-------------|-------------|-------------|
| P | -0.71042500 | -0.23692200 | -2.50665500 |
| N | -0.24228600 | -0.15169100 | 0.24235800  |
| C | 0.46168100  | 2.67663100  | -0.03357100 |
| H | -0.52713000 | 2.20571600  | 0.03478300  |
| C | 1.13374800  | 0.20489600  | 0.06804800  |
| C | 1.49600000  | 1.56423600  | -0.00605400 |
| C | 2.85254900  | 1.88586200  | -0.11115500 |
| H | 3.15030500  | 2.93569100  | -0.16116600 |
| C | 3.82405400  | 0.89205300  | -0.16547300 |

|   |             |             |             |
|---|-------------|-------------|-------------|
| H | 4.87871100  | 1.16109400  | -0.24196600 |
| C | 3.44498700  | -0.44610400 | -0.14744200 |
| H | 4.20766300  | -1.22432200 | -0.22454600 |
| C | 2.10003200  | -0.81399900 | -0.04474400 |
| C | -0.82679000 | -0.33482900 | 1.59889800  |
| C | -1.34010700 | -1.78203200 | 1.70376900  |
| H | -0.48621700 | -2.47192000 | 1.76559200  |
| H | -1.89774600 | -1.87913100 | 2.64756000  |
| C | -2.23098000 | -2.08706900 | 0.48818900  |
| H | -3.21492800 | -2.47031600 | 0.79900300  |
| H | -1.77532500 | -2.85418100 | -0.15643200 |
| C | -2.45190900 | -0.81612300 | -0.36791300 |
| C | -1.06604900 | -0.36855100 | -0.82379700 |
| C | 0.61593800  | 3.64265900  | 1.14478000  |
| H | 0.55296600  | 3.12358600  | 2.11220600  |
| H | -0.17283900 | 4.40920200  | 1.11755500  |
| H | 1.58632000  | 4.16110200  | 1.10698200  |
| C | 1.72361100  | -2.28516500 | -0.10691400 |
| H | 0.62816800  | -2.35042000 | -0.06255000 |
| C | 2.30266800  | -3.07440700 | 1.07124900  |
| H | 3.40323300  | -3.06632300 | 1.04808700  |
| H | 1.97534800  | -4.12407700 | 1.03002300  |
| H | 1.98757300  | -2.65580600 | 2.03841600  |
| C | 0.18211600  | -0.02922800 | 2.69342600  |
| H | 1.05985300  | -0.68584900 | 2.62701100  |
| H | -0.29811800 | -0.18453300 | 3.66976000  |
| H | 0.53353100  | 1.00951200  | 2.63743800  |
| C | -2.04687500 | 0.59314100  | 1.69400100  |
| H | -1.70357900 | 1.63774800  | 1.64058300  |
| H | -2.51381800 | 0.46247500  | 2.68203700  |

|   |             |             |             |
|---|-------------|-------------|-------------|
| C | -3.04933400 | 0.28555800  | 0.55826000  |
| H | -3.95719300 | -0.16177100 | 0.99741100  |
| C | -3.45835300 | 1.54856400  | -0.19579200 |
| H | -2.61858000 | 1.93256500  | -0.79758100 |
| H | -3.76451700 | 2.33338900  | 0.51156400  |
| H | -4.30095900 | 1.36530500  | -0.87603600 |
| C | -3.40181900 | -1.14353400 | -1.51398500 |
| H | -3.03698700 | -2.00878800 | -2.08513100 |
| H | -3.50608100 | -0.30483700 | -2.21460900 |
| H | -4.39544400 | -1.38671200 | -1.10657500 |
| C | 0.50912400  | 3.43295800  | -1.36595900 |
| H | 1.47268500  | 3.94954400  | -1.49636000 |
| H | -0.28723200 | 4.19153700  | -1.40165600 |
| H | 0.36621500  | 2.74423300  | -2.21005500 |
| C | 2.15417100  | -2.90200100 | -1.44228100 |
| H | 1.70953400  | -2.35311500 | -2.28397300 |
| H | 1.82483600  | -3.95004000 | -1.50184900 |
| H | 3.24917900  | -2.88652400 | -1.55460800 |
| H | 0.65217400  | 0.15053600  | -2.36083300 |

**Table S19: Theoretically calculated Bond length [Å] and Bond angle [°] for optimized structure of compound 1.**

| Number | Atom1 | Atom2 | Length |
|--------|-------|-------|--------|
| 1      | Cl1   | P2    | 2.1148 |
| 2      | P2    | C23   | 1.7234 |
| 3      | N3    | C6    | 1.4383 |
| 4      | N3    | C15   | 1.4950 |
| 5      | N3    | C23   | 1.3598 |
| 6      | C4    | H5    | 1.0970 |



|    |     |     |        |
|----|-----|-----|--------|
| 7  | C4  | C7  | 1.5190 |
| 8  | C4  | C24 | 1.5301 |
| 9  | C4  | C51 | 1.5334 |
| 10 | C6  | C7  | 1.4077 |
| 11 | C6  | C14 | 1.4065 |
| 12 | C7  | C8  | 1.3960 |
| 13 | C8  | H9  | 1.0913 |
| 14 | C8  | C10 | 1.3914 |
| 15 | C10 | H11 | 1.0911 |
| 16 | C10 | C12 | 1.3891 |
| 17 | C12 | H13 | 1.0920 |
| 18 | C12 | C14 | 1.3983 |
| 19 | C14 | C28 | 1.5201 |
| 20 | C15 | C16 | 1.5377 |
| 21 | C15 | C34 | 1.5201 |
| 22 | C15 | C38 | 1.5361 |
| 23 | C16 | H17 | 1.0982 |
| 24 | C16 | H18 | 1.1000 |
| 25 | C16 | C19 | 1.5372 |
| 26 | C19 | H20 | 1.1009 |
| 27 | C19 | H21 | 1.1005 |
| 28 | C19 | C22 | 1.5487 |
| 29 | C22 | C23 | 1.5352 |
| 30 | C22 | C41 | 1.5575 |
| 31 | C22 | C47 | 1.5284 |
| 32 | C24 | H25 | 1.1004 |
| 33 | C24 | H26 | 1.0999 |
| 34 | C24 | H27 | 1.1001 |
| 35 | C28 | H29 | 1.0980 |
| 36 | C28 | C30 | 1.5326 |

|    |     |     |        |
|----|-----|-----|--------|
| 37 | C28 | C55 | 1.5328 |
| 38 | C30 | H31 | 1.1008 |
| 39 | C30 | H32 | 1.1006 |
| 40 | C30 | H33 | 1.1003 |
| 41 | C34 | H35 | 1.0983 |
| 42 | C34 | H36 | 1.0991 |
| 43 | C34 | H37 | 1.0987 |
| 44 | C38 | H39 | 1.0996 |
| 45 | C38 | H40 | 1.1003 |
| 46 | C38 | C41 | 1.5440 |
| 47 | C41 | H42 | 1.1027 |
| 48 | C41 | C43 | 1.5267 |
| 49 | C43 | H44 | 1.1016 |
| 50 | C43 | H45 | 1.0998 |
| 51 | C43 | H46 | 1.0984 |
| 52 | C47 | H48 | 1.0990 |
| 53 | C47 | H49 | 1.0973 |
| 54 | C47 | H50 | 1.1005 |
| 55 | C51 | H52 | 1.1012 |
| 56 | C51 | H53 | 1.1008 |
| 57 | C51 | H54 | 1.0988 |
| 58 | C55 | H56 | 1.0981 |
| 59 | C55 | H57 | 1.1002 |
| 60 | C55 | H58 | 1.1008 |

| Number | Atom1 | Atom2 | Atom3 | Angle  |
|--------|-------|-------|-------|--------|
| 1      | Cl1   | P2    | C23   | 108.45 |
| 2      | C6    | N3    | C15   | 120.29 |
| 3      | C6    | N3    | C23   | 122.16 |
| 4      | C15   | N3    | C23   | 116.87 |
| 5      | H5    | C4    | C7    | 107.25 |

|    |     |     |     |        |
|----|-----|-----|-----|--------|
| 6  | H5  | C4  | C24 | 107.77 |
| 7  | H5  | C4  | C51 | 106.99 |
| 8  | C7  | C4  | C24 | 112.91 |
| 9  | C7  | C4  | C51 | 110.67 |
| 10 | C24 | C4  | C51 | 110.96 |
| 11 | N3  | C6  | C7  | 119.02 |
| 12 | N3  | C6  | C14 | 119.49 |
| 13 | C7  | C6  | C14 | 121.48 |
| 14 | C4  | C7  | C6  | 121.70 |
| 15 | C4  | C7  | C8  | 119.85 |
| 16 | C6  | C7  | C8  | 118.35 |
| 17 | C7  | C8  | H9  | 119.48 |
| 18 | C7  | C8  | C10 | 121.00 |
| 19 | H9  | C8  | C10 | 119.52 |
| 20 | C8  | C10 | H11 | 120.06 |
| 21 | C8  | C10 | C12 | 119.85 |
| 22 | H11 | C10 | C12 | 120.09 |
| 23 | C10 | C12 | H13 | 119.58 |
| 24 | C10 | C12 | C14 | 121.17 |
| 25 | H13 | C12 | C14 | 119.24 |
| 26 | C6  | C14 | C12 | 118.15 |
| 27 | C6  | C14 | C28 | 123.01 |
| 28 | C12 | C14 | C28 | 118.81 |
| 29 | N3  | C15 | C16 | 107.58 |
| 30 | N3  | C15 | C34 | 111.66 |
| 31 | N3  | C15 | C38 | 108.28 |
| 32 | C16 | C15 | C34 | 111.27 |
| 33 | C16 | C15 | C38 | 106.88 |
| 34 | C34 | C15 | C38 | 110.96 |
| 35 | C15 | C16 | H17 | 109.45 |

|    |     |     |     |        |
|----|-----|-----|-----|--------|
| 36 | C15 | C16 | H18 | 108.35 |
| 37 | C15 | C16 | C19 | 108.77 |
| 38 | H17 | C16 | H18 | 106.94 |
| 39 | H17 | C16 | C19 | 111.75 |
| 40 | H18 | C16 | C19 | 111.51 |
| 41 | C16 | C19 | H20 | 111.26 |
| 42 | C16 | C19 | H21 | 111.28 |
| 43 | C16 | C19 | C22 | 111.36 |
| 44 | H20 | C19 | H21 | 106.91 |
| 45 | H20 | C19 | C22 | 107.78 |
| 46 | H21 | C19 | C22 | 108.04 |
| 47 | C19 | C22 | C23 | 106.60 |
| 48 | C19 | C22 | C41 | 108.34 |
| 49 | C19 | C22 | C47 | 108.24 |
| 50 | C23 | C22 | C41 | 107.26 |
| 51 | C23 | C22 | C47 | 115.65 |
| 52 | C41 | C22 | C47 | 110.49 |
| 53 | P2  | C23 | N3  | 134.97 |
| 54 | P2  | C23 | C22 | 113.68 |
| 55 | N3  | C23 | C22 | 111.34 |
| 56 | C4  | C24 | H25 | 111.76 |
| 57 | C4  | C24 | H26 | 110.13 |
| 58 | C4  | C24 | H27 | 111.56 |
| 59 | H25 | C24 | H26 | 108.30 |
| 60 | H25 | C24 | H27 | 107.78 |
| 61 | H26 | C24 | H27 | 107.14 |
| 62 | C14 | C28 | H29 | 108.00 |
| 63 | C14 | C28 | C30 | 111.14 |
| 64 | C14 | C28 | C55 | 111.56 |
| 65 | H29 | C28 | C30 | 108.34 |

|    |     |     |     |        |
|----|-----|-----|-----|--------|
| 66 | H29 | C28 | C55 | 106.86 |
| 67 | C30 | C28 | C55 | 110.76 |
| 68 | C28 | C30 | H31 | 110.71 |
| 69 | C28 | C30 | H32 | 110.64 |
| 70 | C28 | C30 | H33 | 111.85 |
| 71 | H31 | C30 | H32 | 107.78 |
| 72 | H31 | C30 | H33 | 107.44 |
| 73 | H32 | C30 | H33 | 108.27 |
| 74 | C15 | C34 | H35 | 111.64 |
| 75 | C15 | C34 | H36 | 108.47 |
| 76 | C15 | C34 | H37 | 111.57 |
| 77 | H35 | C34 | H36 | 108.60 |
| 78 | H35 | C34 | H37 | 108.07 |
| 79 | H36 | C34 | H37 | 108.40 |
| 80 | C15 | C38 | H39 | 109.88 |
| 81 | C15 | C38 | H40 | 107.85 |
| 82 | C15 | C38 | C41 | 110.64 |
| 83 | H39 | C38 | H40 | 106.46 |
| 84 | H39 | C38 | C41 | 110.63 |
| 85 | H40 | C38 | C41 | 111.26 |
| 86 | C22 | C41 | C38 | 109.03 |
| 87 | C22 | C41 | H42 | 105.42 |
| 88 | C22 | C41 | C43 | 113.36 |
| 89 | C38 | C41 | H42 | 109.11 |
| 90 | C38 | C41 | C43 | 111.30 |
| 91 | H42 | C41 | C43 | 108.39 |
| 92 | C41 | C43 | H44 | 110.77 |
| 93 | C41 | C43 | H45 | 109.96 |
| 94 | C41 | C43 | H46 | 112.27 |
| 95 | H44 | C43 | H45 | 108.11 |

|     |     |     |     |        |
|-----|-----|-----|-----|--------|
| 96  | H44 | C43 | H46 | 107.93 |
| 97  | H45 | C43 | H46 | 107.66 |
| 98  | C22 | C47 | H48 | 111.17 |
| 99  | C22 | C47 | H49 | 112.77 |
| 100 | C22 | C47 | H50 | 108.51 |
| 101 | H48 | C47 | H49 | 107.86 |
| 102 | H48 | C47 | H50 | 108.14 |
| 103 | H49 | C47 | H50 | 108.25 |
| 104 | C4  | C51 | H52 | 110.52 |
| 105 | C4  | C51 | H53 | 110.39 |
| 106 | C4  | C51 | H54 | 111.25 |
| 107 | H52 | C51 | H53 | 108.32 |
| 108 | H52 | C51 | H54 | 107.45 |
| 109 | H53 | C51 | H54 | 108.81 |
| 110 | C28 | C55 | H56 | 110.97 |
| 111 | C28 | C55 | H57 | 110.15 |
| 112 | C28 | C55 | H58 | 111.14 |
| 113 | H56 | C55 | H57 | 108.80 |
| 114 | H56 | C55 | H58 | 108.06 |
| 115 | H57 | C55 | H58 | 107.60 |

**Table S20: Theoretically calculated Bond length [Å] and Bond angle [°] for optimized structure of compound 1'.**

| Number | Atom1 | Atom2 | Length |
|--------|-------|-------|--------|
| 1      | Cl1   | P2    | 2.1097 |
| 2      | P2    | C23   | 1.7381 |
| 3      | N3    | C6    | 1.4346 |
| 4      | N3    | C15   | 1.4849 |
| 5      | N3    | C23   | 1.3732 |
| 6      | C4    | H5    | 1.0978 |

|    |     |     |        |
|----|-----|-----|--------|
| 7  | C4  | C7  | 1.5197 |
| 8  | C4  | C24 | 1.5321 |
| 9  | C4  | C51 | 1.5329 |
| 10 | C6  | C7  | 1.4107 |
| 11 | C6  | C14 | 1.4106 |
| 12 | C7  | C8  | 1.3978 |
| 13 | C8  | H9  | 1.0921 |
| 14 | C8  | C10 | 1.3906 |
| 15 | C10 | H11 | 1.0911 |
| 16 | C10 | C12 | 1.3908 |
| 17 | C12 | H13 | 1.0921 |
| 18 | C12 | C14 | 1.3977 |
| 19 | C14 | C28 | 1.5200 |
| 20 | C15 | C16 | 1.5369 |
| 21 | C15 | C34 | 1.5195 |
| 22 | C15 | C38 | 1.5341 |
| 23 | C16 | H17 | 1.0992 |
| 24 | C16 | H18 | 1.1005 |
| 25 | C16 | C19 | 1.5348 |
| 26 | C19 | H20 | 1.1003 |
| 27 | C19 | H21 | 1.1006 |
| 28 | C19 | C22 | 1.5520 |
| 29 | C22 | C23 | 1.5302 |
| 30 | C22 | C41 | 1.5606 |
| 31 | C22 | C47 | 1.5240 |
| 32 | C24 | H25 | 1.0992 |
| 33 | C24 | H26 | 1.1003 |
| 34 | C24 | H27 | 1.1008 |
| 35 | C28 | H29 | 1.0989 |
| 36 | C28 | C30 | 1.5323 |

|    |     |     |        |
|----|-----|-----|--------|
| 37 | C28 | C55 | 1.5328 |
| 38 | C30 | H31 | 1.1008 |
| 39 | C30 | H32 | 1.1004 |
| 40 | C30 | H33 | 1.0996 |
| 41 | C34 | H35 | 1.0978 |
| 42 | C34 | H36 | 1.0990 |
| 43 | C34 | H37 | 1.0974 |
| 44 | C38 | H39 | 1.1008 |
| 45 | C38 | H40 | 1.1007 |
| 46 | C38 | C41 | 1.5444 |
| 47 | C41 | H42 | 1.1030 |
| 48 | C41 | C43 | 1.5273 |
| 49 | C43 | H44 | 1.1026 |
| 50 | C43 | H45 | 1.0999 |
| 51 | C43 | H46 | 1.0978 |
| 52 | C47 | H48 | 1.0973 |
| 53 | C47 | H49 | 1.0936 |
| 54 | C47 | H50 | 1.1014 |
| 55 | C51 | H52 | 1.1009 |
| 56 | C51 | H53 | 1.1002 |
| 57 | C51 | H54 | 1.0985 |
| 58 | C55 | H56 | 1.0985 |
| 59 | C55 | H57 | 1.1000 |
| 60 | C55 | H58 | 1.1008 |

| Number | Atom1 | Atom2 | Atom3 | Angle  |
|--------|-------|-------|-------|--------|
| 1      | Cl1   | P2    | C23   | 107.62 |
| 2      | C6    | N3    | C15   | 121.32 |
| 3      | C6    | N3    | C23   | 120.58 |
| 4      | C15   | N3    | C23   | 118.09 |
| 5      | H5    | C4    | C7    | 107.32 |



|    |     |     |     |        |
|----|-----|-----|-----|--------|
| 6  | H5  | C4  | C24 | 108.39 |
| 7  | H5  | C4  | C51 | 107.27 |
| 8  | C7  | C4  | C24 | 112.30 |
| 9  | C7  | C4  | C51 | 110.97 |
| 10 | C24 | C4  | C51 | 110.38 |
| 11 | N3  | C6  | C7  | 119.63 |
| 12 | N3  | C6  | C14 | 119.15 |
| 13 | C7  | C6  | C14 | 121.22 |
| 14 | C4  | C7  | C6  | 122.47 |
| 15 | C4  | C7  | C8  | 119.25 |
| 16 | C6  | C7  | C8  | 118.25 |
| 17 | C7  | C8  | H9  | 119.24 |
| 18 | C7  | C8  | C10 | 121.12 |
| 19 | H9  | C8  | C10 | 119.64 |
| 20 | C8  | C10 | H11 | 120.07 |
| 21 | C8  | C10 | C12 | 119.87 |
| 22 | H11 | C10 | C12 | 120.05 |
| 23 | C10 | C12 | H13 | 119.63 |
| 24 | C10 | C12 | C14 | 121.08 |
| 25 | H13 | C12 | C14 | 119.29 |
| 26 | C6  | C14 | C12 | 118.29 |
| 27 | C6  | C14 | C28 | 122.46 |
| 28 | C12 | C14 | C28 | 119.24 |
| 29 | N3  | C15 | C16 | 107.76 |
| 30 | N3  | C15 | C34 | 111.77 |
| 31 | N3  | C15 | C38 | 106.70 |
| 32 | C16 | C15 | C34 | 111.16 |
| 33 | C16 | C15 | C38 | 107.89 |
| 34 | C34 | C15 | C38 | 111.35 |
| 35 | C15 | C16 | H17 | 109.52 |

|    |     |     |     |        |
|----|-----|-----|-----|--------|
| 36 | C15 | C16 | H18 | 108.26 |
| 37 | C15 | C16 | C19 | 108.73 |
| 38 | H17 | C16 | H18 | 106.98 |
| 39 | H17 | C16 | C19 | 111.70 |
| 40 | H18 | C16 | C19 | 111.58 |
| 41 | C16 | C19 | H20 | 111.20 |
| 42 | C16 | C19 | H21 | 111.38 |
| 43 | C16 | C19 | C22 | 111.67 |
| 44 | H20 | C19 | H21 | 106.79 |
| 45 | H20 | C19 | C22 | 107.67 |
| 46 | H21 | C19 | C22 | 107.91 |
| 47 | C19 | C22 | C23 | 105.57 |
| 48 | C19 | C22 | C41 | 107.94 |
| 49 | C19 | C22 | C47 | 107.72 |
| 50 | C23 | C22 | C41 | 107.87 |
| 51 | C23 | C22 | C47 | 117.40 |
| 52 | C41 | C22 | C47 | 109.92 |
| 53 | P2  | C23 | N3  | 114.45 |
| 54 | P2  | C23 | C22 | 135.21 |
| 55 | N3  | C23 | C22 | 110.31 |
| 56 | C4  | C24 | H25 | 112.21 |
| 57 | C4  | C24 | H26 | 110.30 |
| 58 | C4  | C24 | H27 | 110.86 |
| 59 | H25 | C24 | H26 | 107.96 |
| 60 | H25 | C24 | H27 | 107.64 |
| 61 | H26 | C24 | H27 | 107.71 |
| 62 | C14 | C28 | H29 | 107.61 |
| 63 | C14 | C28 | C30 | 111.92 |
| 64 | C14 | C28 | C55 | 110.90 |
| 65 | H29 | C28 | C30 | 108.46 |

|    |     |     |     |        |
|----|-----|-----|-----|--------|
| 66 | H29 | C28 | C55 | 107.19 |
| 67 | C30 | C28 | C55 | 110.56 |
| 68 | C28 | C30 | H31 | 110.81 |
| 69 | C28 | C30 | H32 | 110.44 |
| 70 | C28 | C30 | H33 | 112.08 |
| 71 | H31 | C30 | H32 | 107.70 |
| 72 | H31 | C30 | H33 | 107.58 |
| 73 | H32 | C30 | H33 | 108.07 |
| 74 | C15 | C34 | H35 | 111.57 |
| 75 | C15 | C34 | H36 | 108.57 |
| 76 | C15 | C34 | H37 | 111.64 |
| 77 | H35 | C34 | H36 | 108.55 |
| 78 | H35 | C34 | H37 | 107.83 |
| 79 | H36 | C34 | H37 | 108.59 |
| 80 | C15 | C38 | H39 | 108.63 |
| 81 | C15 | C38 | H40 | 108.99 |
| 82 | C15 | C38 | C41 | 110.24 |
| 83 | H39 | C38 | H40 | 106.91 |
| 84 | H39 | C38 | C41 | 110.78 |
| 85 | H40 | C38 | C41 | 111.19 |
| 86 | C22 | C41 | C38 | 109.88 |
| 87 | C22 | C41 | H42 | 104.90 |
| 88 | C22 | C41 | C43 | 112.94 |
| 89 | C38 | C41 | H42 | 108.69 |
| 90 | C38 | C41 | C43 | 111.90 |
| 91 | H42 | C41 | C43 | 108.20 |
| 92 | C41 | C43 | H44 | 110.69 |
| 93 | C41 | C43 | H45 | 110.34 |
| 94 | C41 | C43 | H46 | 112.05 |
| 95 | H44 | C43 | H45 | 108.19 |

|     |     |     |     |        |
|-----|-----|-----|-----|--------|
| 96  | H44 | C43 | H46 | 107.73 |
| 97  | H45 | C43 | H46 | 107.70 |
| 98  | C22 | C47 | H48 | 111.32 |
| 99  | C22 | C47 | H49 | 112.92 |
| 100 | C22 | C47 | H50 | 107.82 |
| 101 | H48 | C47 | H49 | 107.53 |
| 102 | H48 | C47 | H50 | 108.51 |
| 103 | H49 | C47 | H50 | 108.63 |
| 104 | C4  | C51 | H52 | 111.22 |
| 105 | C4  | C51 | H53 | 110.13 |
| 106 | C4  | C51 | H54 | 110.81 |
| 107 | H52 | C51 | H53 | 107.64 |
| 108 | H52 | C51 | H54 | 108.50 |
| 109 | H53 | C51 | H54 | 108.44 |
| 110 | C28 | C55 | H56 | 110.70 |
| 111 | C28 | C55 | H57 | 110.21 |
| 112 | C28 | C55 | H58 | 111.21 |
| 113 | H56 | C55 | H57 | 108.48 |
| 114 | H56 | C55 | H58 | 108.48 |
| 115 | H57 | C55 | H58 | 107.67 |

**Table S21: Theoretically calculated Bond length [Å] and Bond angle [°] for optimized structure of compound 5.**

| Number | Atom1 | Atom2 | Length |
|--------|-------|-------|--------|
| 1      | P1    | C11   | 1.7181 |
| 2      | P1    | Cl33  | 2.1147 |
| 3      | N2    | C3    | 1.4810 |
| 4      | N2    | C11   | 1.3606 |
| 5      | N2    | C29   | 1.4534 |
| 6      | C3    | C4    | 1.5383 |

|    |     |     |        |
|----|-----|-----|--------|
| 7  | C3  | C12 | 1.5230 |
| 8  | C3  | C16 | 1.5356 |
| 9  | C4  | H5  | 1.0996 |
| 10 | C4  | H6  | 1.0995 |
| 11 | C4  | C7  | 1.5347 |
| 12 | C7  | H8  | 1.1019 |
| 13 | C7  | H9  | 1.0990 |
| 14 | C7  | C10 | 1.5448 |
| 15 | C10 | C11 | 1.5296 |
| 16 | C10 | C19 | 1.5596 |
| 17 | C10 | C25 | 1.5264 |
| 18 | C12 | H13 | 1.0994 |
| 19 | C12 | H14 | 1.0988 |
| 20 | C12 | H15 | 1.0974 |
| 21 | C16 | H17 | 1.1019 |
| 22 | C16 | H18 | 1.1013 |
| 23 | C16 | C19 | 1.5487 |
| 24 | C19 | H20 | 1.1023 |
| 25 | C19 | C21 | 1.5267 |
| 26 | C21 | H22 | 1.1016 |
| 27 | C21 | H23 | 1.0997 |
| 28 | C21 | H24 | 1.0984 |
| 29 | C25 | H26 | 1.0992 |
| 30 | C25 | H27 | 1.0984 |
| 31 | C25 | H28 | 1.1006 |
| 32 | C29 | H30 | 1.0994 |
| 33 | C29 | H31 | 1.0949 |
| 34 | C29 | H32 | 1.0994 |

Number Atom1 Atom2 Atom3 Angle

|   |     |    |      |        |
|---|-----|----|------|--------|
| 1 | C11 | P1 | Cl33 | 103.72 |
|---|-----|----|------|--------|

|    |     |     |     |        |
|----|-----|-----|-----|--------|
| 2  | C3  | N2  | C11 | 115.58 |
| 3  | C3  | N2  | C29 | 119.54 |
| 4  | C11 | N2  | C29 | 122.19 |
| 5  | N2  | C3  | C4  | 106.73 |
| 6  | N2  | C3  | C12 | 111.93 |
| 7  | N2  | C3  | C16 | 107.40 |
| 8  | C4  | C3  | C12 | 109.49 |
| 9  | C4  | C3  | C16 | 108.54 |
| 10 | C12 | C3  | C16 | 112.53 |
| 11 | C3  | C4  | H5  | 107.96 |
| 12 | C3  | C4  | H6  | 108.87 |
| 13 | C3  | C4  | C7  | 109.66 |
| 14 | H5  | C4  | H6  | 107.60 |
| 15 | H5  | C4  | C7  | 111.12 |
| 16 | H6  | C4  | C7  | 111.52 |
| 17 | C4  | C7  | H8  | 111.53 |
| 18 | C4  | C7  | H9  | 111.14 |
| 19 | C4  | C7  | C10 | 109.90 |
| 20 | H8  | C7  | H9  | 107.40 |
| 21 | H8  | C7  | C10 | 107.92 |
| 22 | H9  | C7  | C10 | 108.84 |
| 23 | C7  | C10 | C11 | 106.19 |
| 24 | C7  | C10 | C19 | 107.73 |
| 25 | C7  | C10 | C25 | 109.26 |
| 26 | C11 | C10 | C19 | 107.29 |
| 27 | C11 | C10 | C25 | 114.82 |
| 28 | C19 | C10 | C25 | 111.22 |
| 29 | P1  | C11 | N2  | 131.27 |
| 30 | P1  | C11 | C10 | 116.75 |
| 31 | N2  | C11 | C10 | 111.98 |

|    |     |     |     |        |
|----|-----|-----|-----|--------|
| 32 | C3  | C12 | H13 | 110.81 |
| 33 | C3  | C12 | H14 | 108.74 |
| 34 | C3  | C12 | H15 | 112.78 |
| 35 | H13 | C12 | H14 | 108.16 |
| 36 | H13 | C12 | H15 | 108.74 |
| 37 | H14 | C12 | H15 | 107.45 |
| 38 | C3  | C16 | H17 | 109.14 |
| 39 | C3  | C16 | H18 | 109.16 |
| 40 | C3  | C16 | C19 | 109.53 |
| 41 | H17 | C16 | H18 | 106.87 |
| 42 | H17 | C16 | C19 | 110.23 |
| 43 | H18 | C16 | C19 | 111.84 |
| 44 | C10 | C19 | C16 | 109.36 |
| 45 | C10 | C19 | H20 | 105.75 |
| 46 | C10 | C19 | C21 | 112.90 |
| 47 | C16 | C19 | H20 | 109.06 |
| 48 | C16 | C19 | C21 | 111.20 |
| 49 | H20 | C19 | C21 | 108.36 |
| 50 | C19 | C21 | H22 | 110.77 |
| 51 | C19 | C21 | H23 | 110.15 |
| 52 | C19 | C21 | H24 | 112.21 |
| 53 | H22 | C21 | H23 | 107.97 |
| 54 | H22 | C21 | H24 | 107.91 |
| 55 | H23 | C21 | H24 | 107.68 |
| 56 | C10 | C25 | H26 | 111.03 |
| 57 | C10 | C25 | H27 | 112.46 |
| 58 | C10 | C25 | H28 | 109.02 |
| 59 | H26 | C25 | H27 | 107.86 |
| 60 | H26 | C25 | H28 | 108.00 |
| 61 | H27 | C25 | H28 | 108.34 |

|    |     |     |     |        |
|----|-----|-----|-----|--------|
| 62 | N2  | C29 | H30 | 113.21 |
| 63 | N2  | C29 | H31 | 109.15 |
| 64 | N2  | C29 | H32 | 109.18 |
| 65 | H30 | C29 | H31 | 108.01 |
| 66 | H30 | C29 | H32 | 109.12 |
| 67 | H31 | C29 | H32 | 108.04 |

**Table S22: Theoretically calculated Bond length [Å] and Bond angle [°] for optimized structure of compound 6.**

| Number | Atom1 | Atom2 | Length |
|--------|-------|-------|--------|
| 1      | P1    | C22   | 1.7251 |
| 2      | P1    | H58   | 1.4241 |
| 3      | N2    | C5    | 1.4321 |
| 4      | N2    | C14   | 1.4884 |
| 5      | N2    | C22   | 1.3647 |
| 6      | C3    | H4    | 1.0973 |
| 7      | C3    | C6    | 1.5192 |
| 8      | C3    | C23   | 1.5316 |
| 9      | C3    | C50   | 1.5329 |
| 10     | C5    | C6    | 1.4087 |
| 11     | C5    | C13   | 1.4088 |
| 12     | C6    | C7    | 1.3981 |
| 13     | C7    | H8    | 1.0924 |
| 14     | C7    | C9    | 1.3909 |
| 15     | C9    | H10   | 1.0911 |
| 16     | C9    | C11   | 1.3910 |
| 17     | C11   | H12   | 1.0924 |
| 18     | C11   | C13   | 1.3982 |
| 19     | C13   | C27   | 1.5199 |
| 20     | C14   | C15   | 1.5391 |
| 21     | C14   | C33   | 1.5196 |



|    |     |     |        |
|----|-----|-----|--------|
| 22 | C14 | C37 | 1.5358 |
| 23 | C15 | H16 | 1.0995 |
| 24 | C15 | H17 | 1.1005 |
| 25 | C15 | C18 | 1.5377 |
| 26 | C18 | H19 | 1.1007 |
| 27 | C18 | H20 | 1.1007 |
| 28 | C18 | C21 | 1.5483 |
| 29 | C21 | C22 | 1.5260 |
| 30 | C21 | C40 | 1.5584 |
| 31 | C21 | C46 | 1.5242 |
| 32 | C23 | H24 | 1.0997 |
| 33 | C23 | H25 | 1.1001 |
| 34 | C23 | H26 | 1.1008 |
| 35 | C27 | H28 | 1.0982 |
| 36 | C27 | C29 | 1.5317 |
| 37 | C27 | C54 | 1.5327 |
| 38 | C29 | H30 | 1.1008 |
| 39 | C29 | H31 | 1.1003 |
| 40 | C29 | H32 | 1.1000 |
| 41 | C33 | H34 | 1.0982 |
| 42 | C33 | H35 | 1.0991 |
| 43 | C33 | H36 | 1.0980 |
| 44 | C37 | H38 | 1.1009 |
| 45 | C37 | H39 | 1.1005 |
| 46 | C37 | C40 | 1.5457 |
| 47 | C40 | H41 | 1.1033 |
| 48 | C40 | C42 | 1.5268 |
| 49 | C42 | H43 | 1.1022 |
| 50 | C42 | H44 | 1.1000 |
| 51 | C42 | H45 | 1.0983 |

|    |     |     |        |
|----|-----|-----|--------|
| 52 | C46 | H47 | 1.0991 |
| 53 | C46 | H48 | 1.0978 |
| 54 | C46 | H49 | 1.1011 |
| 55 | C50 | H51 | 1.1010 |
| 56 | C50 | H52 | 1.1003 |
| 57 | C50 | H53 | 1.0988 |
| 58 | C54 | H55 | 1.0989 |
| 59 | C54 | H56 | 1.1002 |
| 60 | C54 | H57 | 1.1009 |

Number Atom1 Atom2 Atom3 Angle

|    |     |    |     |        |
|----|-----|----|-----|--------|
| 1  | C22 | P1 | H58 | 96.78  |
| 2  | C5  | N2 | C14 | 121.26 |
| 3  | C5  | N2 | C22 | 121.63 |
| 4  | C14 | N2 | C22 | 117.10 |
| 5  | H4  | C3 | C6  | 107.35 |
| 6  | H4  | C3 | C23 | 108.27 |
| 7  | H4  | C3 | C50 | 107.09 |
| 8  | C6  | C3 | C23 | 112.30 |
| 9  | C6  | C3 | C50 | 110.85 |
| 10 | C23 | C3 | C50 | 110.76 |
| 11 | N2  | C5 | C6  | 119.59 |
| 12 | N2  | C5 | C13 | 119.25 |
| 13 | C6  | C5 | C13 | 121.15 |
| 14 | C3  | C6 | C5  | 122.17 |
| 15 | C3  | C6 | C7  | 119.39 |
| 16 | C5  | C6 | C7  | 118.39 |
| 17 | C6  | C7 | H8  | 119.28 |
| 18 | C6  | C7 | C9  | 121.08 |
| 19 | H8  | C7 | C9  | 119.63 |
| 20 | C7  | C9 | H10 | 120.12 |

|    |     |     |     |        |
|----|-----|-----|-----|--------|
| 21 | C7  | C9  | C11 | 119.77 |
| 22 | H10 | C9  | C11 | 120.10 |
| 23 | C9  | C11 | H12 | 119.61 |
| 24 | C9  | C11 | C13 | 121.08 |
| 25 | H12 | C11 | C13 | 119.30 |
| 26 | C5  | C13 | C11 | 118.39 |
| 27 | C5  | C13 | C27 | 122.24 |
| 28 | C11 | C13 | C27 | 119.34 |
| 29 | N2  | C14 | C15 | 107.98 |
| 30 | N2  | C14 | C33 | 111.78 |
| 31 | N2  | C14 | C37 | 107.10 |
| 32 | C15 | C14 | C33 | 111.19 |
| 33 | C15 | C14 | C37 | 107.39 |
| 34 | C33 | C14 | C37 | 111.18 |
| 35 | C14 | C15 | H16 | 109.56 |
| 36 | C14 | C15 | H17 | 108.08 |
| 37 | C14 | C15 | C18 | 109.02 |
| 38 | H16 | C15 | H17 | 106.85 |
| 39 | H16 | C15 | C18 | 111.71 |
| 40 | H17 | C15 | C18 | 111.53 |
| 41 | C15 | C18 | H19 | 111.33 |
| 42 | C15 | C18 | H20 | 111.18 |
| 43 | C15 | C18 | C21 | 110.91 |
| 44 | H19 | C18 | H20 | 107.03 |
| 45 | H19 | C18 | C21 | 108.32 |
| 46 | H20 | C18 | C21 | 107.90 |
| 47 | C18 | C21 | C22 | 106.04 |
| 48 | C18 | C21 | C40 | 107.84 |
| 49 | C18 | C21 | C46 | 109.17 |
| 50 | C22 | C21 | C40 | 108.57 |

|    |     |     |     |        |
|----|-----|-----|-----|--------|
| 51 | C22 | C21 | C46 | 113.85 |
| 52 | C40 | C21 | C46 | 111.09 |
| 53 | P1  | C22 | N2  | 128.73 |
| 54 | P1  | C22 | C21 | 120.07 |
| 55 | N2  | C22 | C21 | 111.18 |
| 56 | C3  | C23 | H24 | 111.92 |
| 57 | C3  | C23 | H25 | 110.38 |
| 58 | C3  | C23 | H26 | 111.06 |
| 59 | H24 | C23 | H25 | 108.04 |
| 60 | H24 | C23 | H26 | 107.63 |
| 61 | H25 | C23 | H26 | 107.64 |
| 62 | C13 | C27 | H28 | 107.63 |
| 63 | C13 | C27 | C29 | 111.94 |
| 64 | C13 | C27 | C54 | 110.83 |
| 65 | H28 | C27 | C29 | 108.39 |
| 66 | H28 | C27 | C54 | 106.95 |
| 67 | C29 | C27 | C54 | 110.89 |
| 68 | C27 | C29 | H30 | 110.98 |
| 69 | C27 | C29 | H31 | 110.50 |
| 70 | C27 | C29 | H32 | 111.83 |
| 71 | H30 | C29 | H31 | 107.68 |
| 72 | H30 | C29 | H32 | 107.58 |
| 73 | H31 | C29 | H32 | 108.10 |
| 74 | C14 | C33 | H34 | 111.52 |
| 75 | C14 | C33 | H35 | 108.74 |
| 76 | C14 | C33 | H36 | 111.47 |
| 77 | H34 | C33 | H35 | 108.57 |
| 78 | H34 | C33 | H36 | 107.86 |
| 79 | H35 | C33 | H36 | 108.59 |
| 80 | C14 | C37 | H38 | 108.82 |

|     |     |     |     |        |
|-----|-----|-----|-----|--------|
| 81  | C14 | C37 | H39 | 108.72 |
| 82  | C14 | C37 | C40 | 110.46 |
| 83  | H38 | C37 | H39 | 106.77 |
| 84  | H38 | C37 | C40 | 110.82 |
| 85  | H39 | C37 | C40 | 111.15 |
| 86  | C21 | C40 | C37 | 109.19 |
| 87  | C21 | C40 | H41 | 105.39 |
| 88  | C21 | C40 | C42 | 113.20 |
| 89  | C37 | C40 | H41 | 108.78 |
| 90  | C37 | C40 | C42 | 111.84 |
| 91  | H41 | C40 | C42 | 108.15 |
| 92  | C40 | C42 | H43 | 110.71 |
| 93  | C40 | C42 | H44 | 110.31 |
| 94  | C40 | C42 | H45 | 111.92 |
| 95  | H43 | C42 | H44 | 108.34 |
| 96  | H43 | C42 | H45 | 107.73 |
| 97  | H44 | C42 | H45 | 107.69 |
| 98  | C21 | C46 | H47 | 110.67 |
| 99  | C21 | C46 | H48 | 112.02 |
| 100 | C21 | C46 | H49 | 109.37 |
| 101 | H47 | C46 | H48 | 107.54 |
| 102 | H47 | C46 | H49 | 108.53 |
| 103 | H48 | C46 | H49 | 108.61 |
| 104 | C3  | C50 | H51 | 111.19 |
| 105 | C3  | C50 | H52 | 110.24 |
| 106 | C3  | C50 | H53 | 110.76 |
| 107 | H51 | C50 | H52 | 107.83 |
| 108 | H51 | C50 | H53 | 108.48 |
| 109 | H52 | C50 | H53 | 108.25 |
| 110 | C27 | C54 | H55 | 110.65 |

|     |     |     |     |        |
|-----|-----|-----|-----|--------|
| 111 | C27 | C54 | H56 | 110.26 |
| 112 | C27 | C54 | H57 | 111.26 |
| 113 | H55 | C54 | H56 | 108.25 |
| 114 | H55 | C54 | H57 | 108.50 |
| 115 | H56 | C54 | H57 | 107.80 |

## References:

1. E. Tomás-Mendivil, M. M. Hansmann, C. M. Weinstein, R. Jazzar, M. Melaimi and G. Bertrand, *J. Am. Chem. Soc.*, 2017, **139**, 7753–7756.
2. SMART, Bruker Molecular Analysis Research Tool, Version 5.618, Bruker AXS, Madison, WI (2000).
3. SAINT-NT, Version 6.04; Bruker AXS, WI (2001).
4. G. M. Sheldrick, *Acta Crystallogr C Struct Chem*, 2015, **71**, 3–8.
5. G. M. Sheldrick, *Acta Crystallogr A Found Crystallogr*, 2008, **64**, 112–122.
6. O. V. Dolomanov, L. J. Bourhis, R. J. Gildea, J. a. K. Howard and H. Puschmann, *J Appl Cryst*, 2009, **42**, 339–341.
7. CCDC 2264850-2264853 (1-4) contains the supplementary crystallographic data for this paper. These data can be obtained free of charge from The Cambridge Crystallographic Data Centre via <https://www.ccdc.cam.ac.uk/>.
8. M. J. Frisch, F. R. Clemente and G. W. Trucks, *Pittsburgh PA Gaussian Inc* 2009.
9. A. Savin, R. Nesper, S. Wengert and T. F. Fässler, *Angew. Chemie Int. Ed. English*, 1997, **36**, 1808–1832.
10. V. Tsirelson and A. Stash, *Acta Crystallogr. B.*, 2002, **58**, 780–785.
11. T. Lu and F. Chen, *J. Comput. Chem.*, 2012, **33**, 580–592.
12. T. A. Keith, *TK Gristmill Softw. Overl. Park. KS, USA* 2019.
13. M. J. Frisch, G. W. Trucks, H. B. Schlegel, G. E. Scuseria, M. A. Robb, J. R. Cheeseman, G. Scalmani, V. Barone, G. A. Petersson, H. Nakatsuji, X. Li, M. Caricato, A. V. Marenich, J. Bloino, B. G. Janesko, R. Gomperts, B. Mennucci, H. P. Hratchian, J. V. Ortiz, A. F. Izmaylov, J. L. Sonnenberg, D. Williams-Young, F. Ding, F. Lipparini, F. Egidi, J. Goings, B. Peng, A. Petrone, T. Henderson, D. Ranasinghe, V. G. Zakrzewski, J. Gao, N. Rega, G. Zheng, W. Liang, M. Hada, M. Ehara, K. Toyota, R. Fukuda, J. Hasegawa, M. Ishida, T. Nakajima, Y. Honda, O. Kitao, H. Nakai, T. Vreven, K. Throssell, J. A. Montgomery, Jr., J. E. Peralta, F. Ogliaro, M. J. Bearpark, J. J. Heyd, E. N. Brothers, K. N. Kudin, V. N. Staroverov, T. A. Keith, R. Kobayashi, J. Normand, K. Raghavachari, A. P. Rendell, J. C. Burant, S. S. Iyengar, J. Tomasi, M. Cossi, J. M. Millam, M. Klene, C. Adamo, R. Cammi, J. W. Ochterski, R. L. Martin, K. Morokuma, O. Farkas, J. B. Foresman, and D. J. Fox, Gaussian, Inc., Wallingford CT, 2016.
14. Y. Zhao and D. G. Truhlar, *Theor Chem Account*, 2008, **120**, 215–241.
15. F. Weigend and R. Ahlrichs, *Phys. Chem. Chem. Phys.*, 2005, **7**, 3297–3305.
16. D. Jayatilaka and D. J. Grimwood, in *Int. Conf. Comput. Sci.*, Springer, 2003, 142–151.
